# Supplementary material for: Ecosystem physio-phenology revealed using circular statistics
Source: Copernicus journal article supplement (doi:10.5194/bg-17-3991-2020), 2020-08-06

# Ecosystem physio-phenology revealed using circular statistics

## Supplementary information (III)

Daniel E. Pabon-Moreno<sup>1</sup>, Talie Musavi<sup>1</sup>, Mirco Migliavacca<sup>1</sup>, Markus Reichstein<sup>1,2</sup>,  
Christine Römermann<sup>2,3</sup>, and Miguel D. Mahecha<sup>1,2</sup>

<sup>1</sup>Max Planck Institute for Biogeochemistry, Hans-Knoell-Str. 10, 07745 Jena, Germany.

<sup>2</sup>German Centre for Integrative Biodiversity Research (iDiv), Deutscher Platz 5e, 04103 Leipzig, Germany.

<sup>3</sup>Friedrich Schiller University, Institute of Ecology and Evolution, Philosophenweg 16, D-07743 Jena, Germany.

### 1 $\text{DOY}_{\text{GPPmax}}$ sensitivity to different climate drivers

$\text{DOY}_{\text{GPPmax}}$  sensitivity to different climate drivers for each FLUXNET site analyzed. a)  $\text{DOY}_{\text{GPPmax}}$  distribution across the year. The arrow indicate the mean angular direction of the growing season. b) Regression coefficients for each growing season. c) Significance values for each variable. The red line represents a p-value of 0.05.

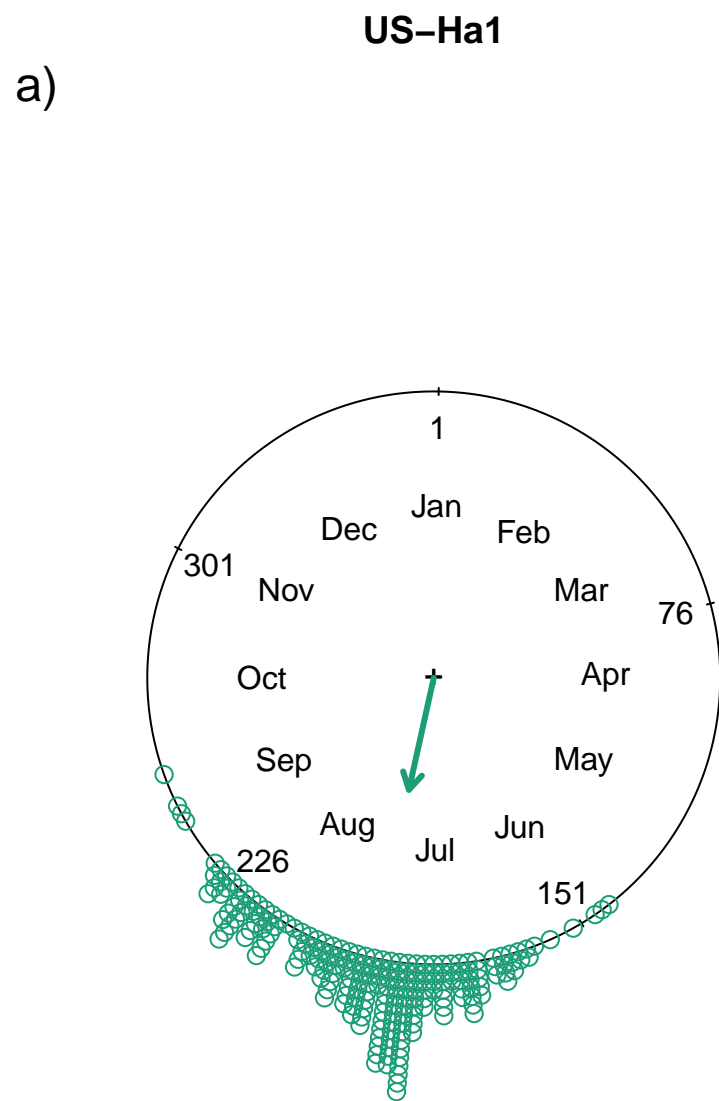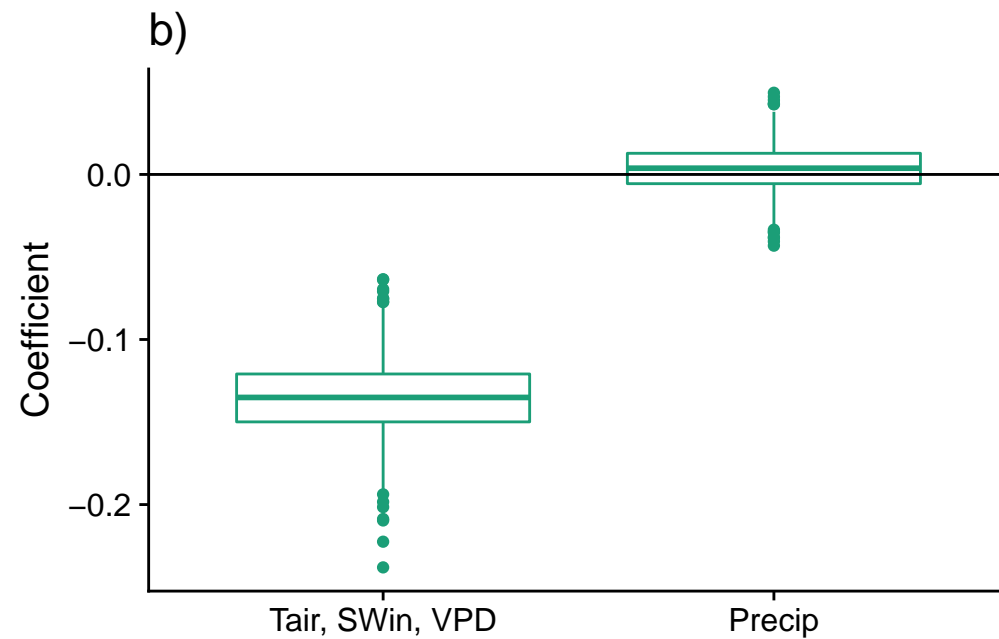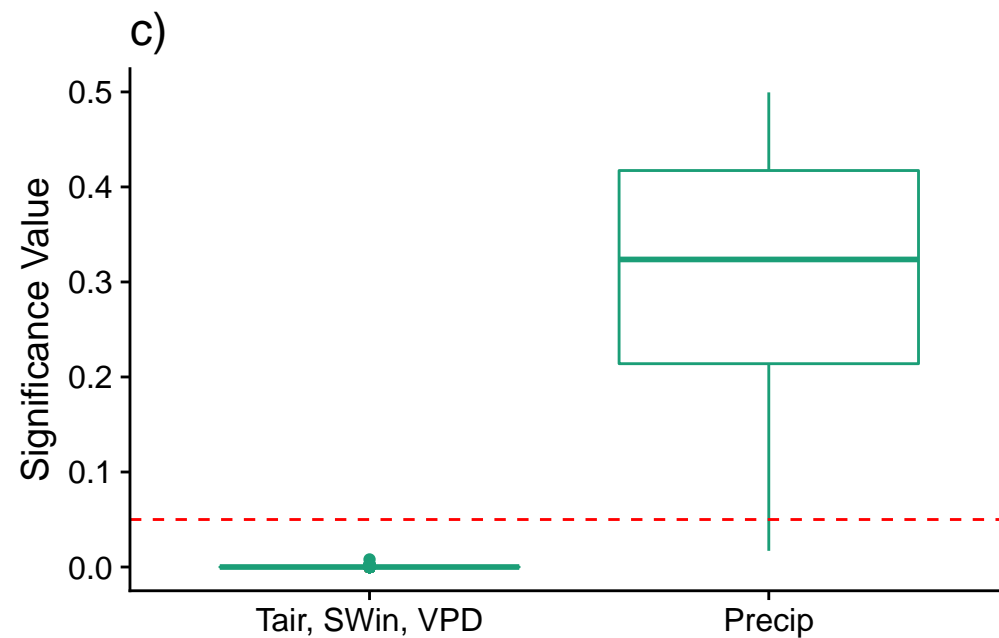

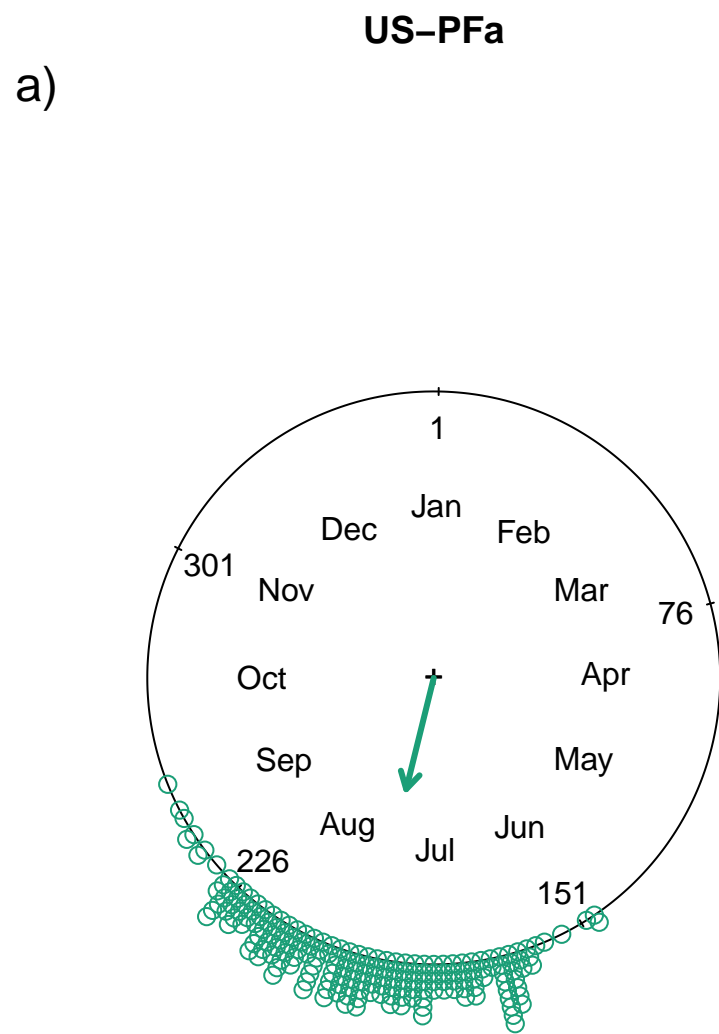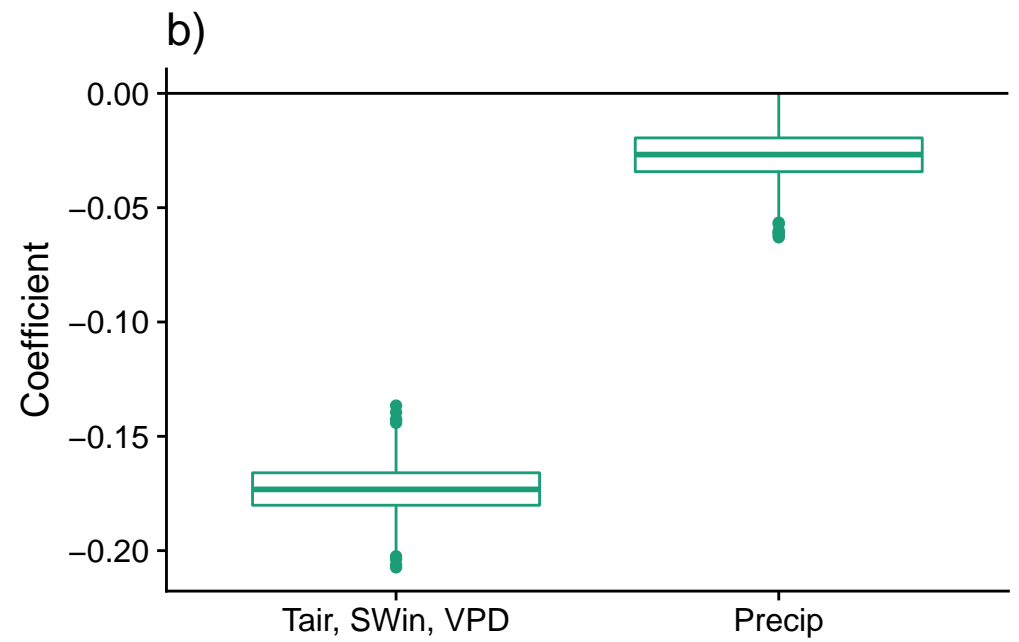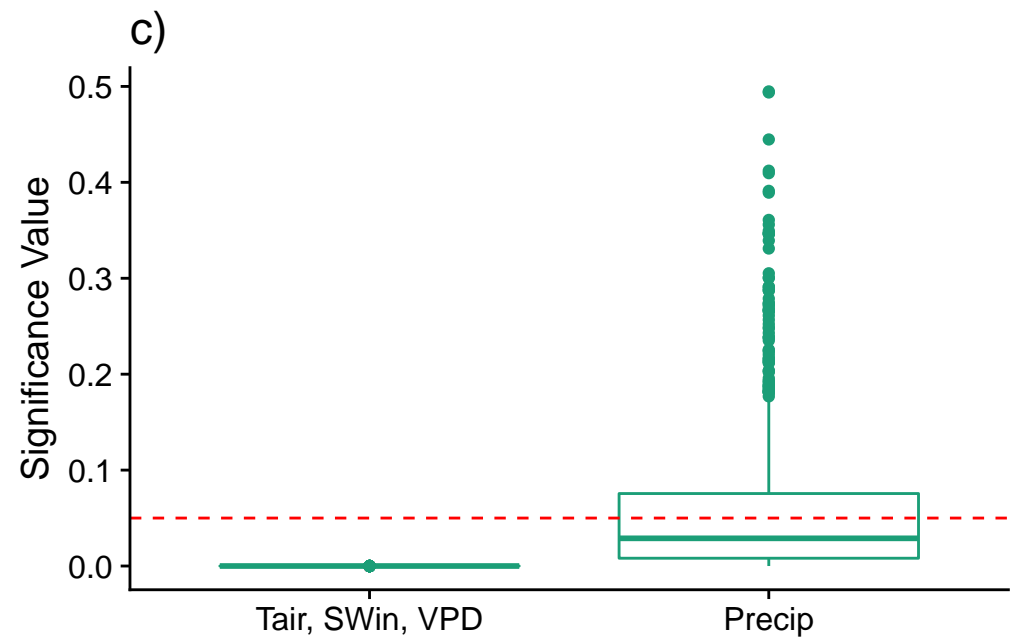

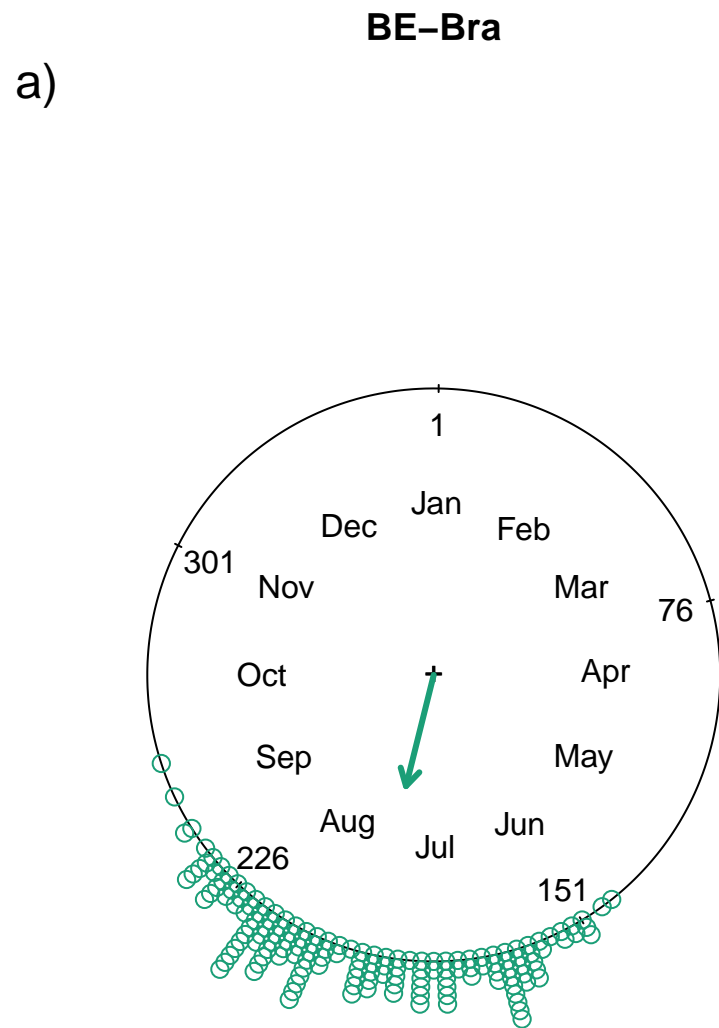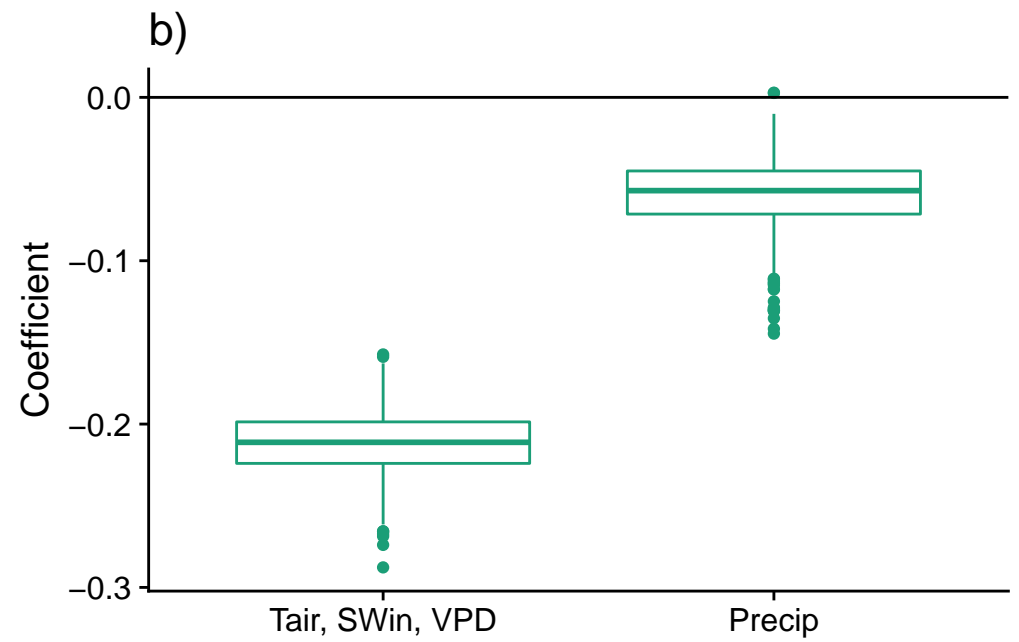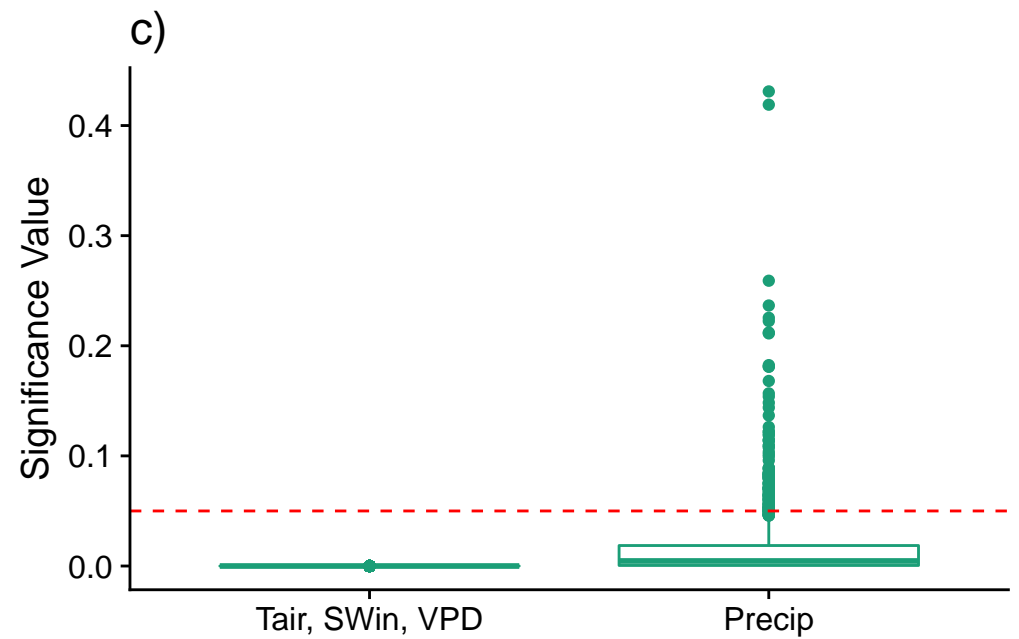

# BE-Vie

a)

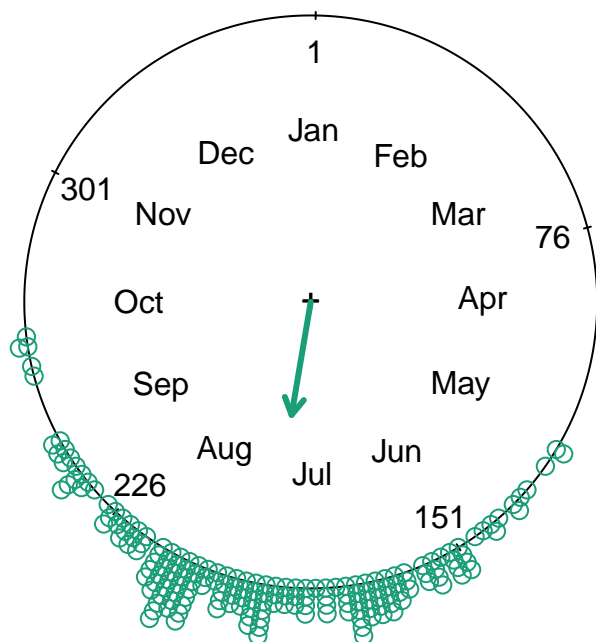

b)

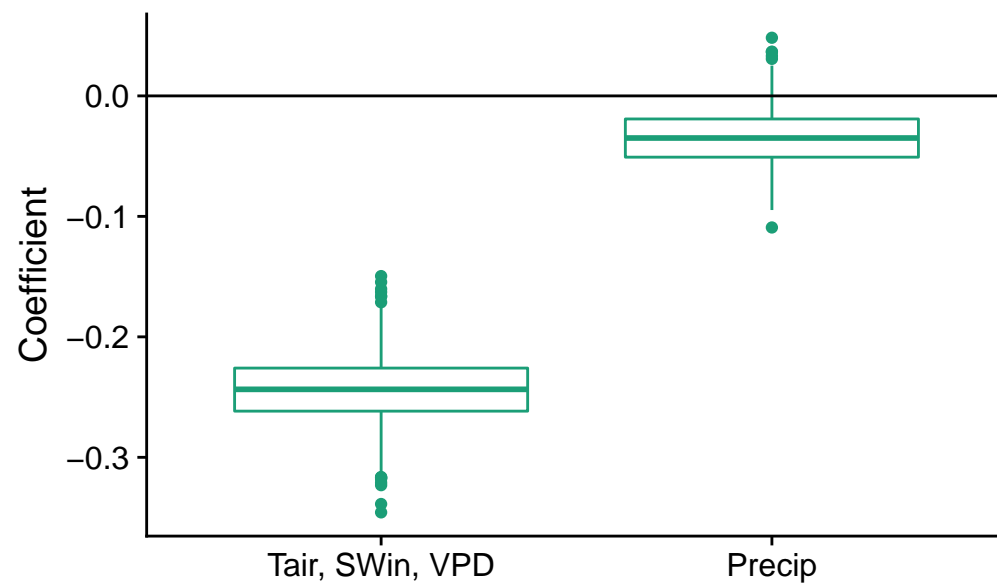

c)

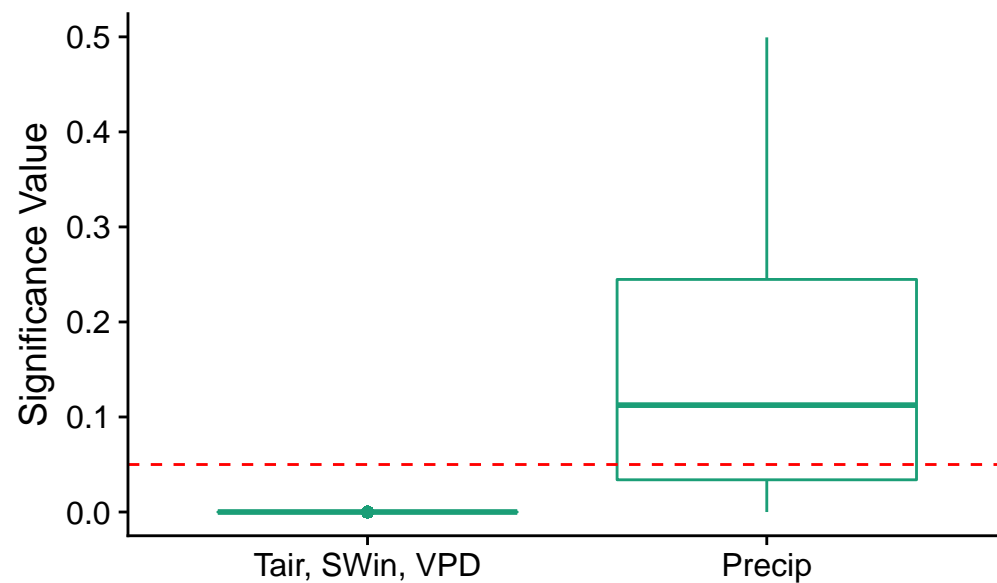

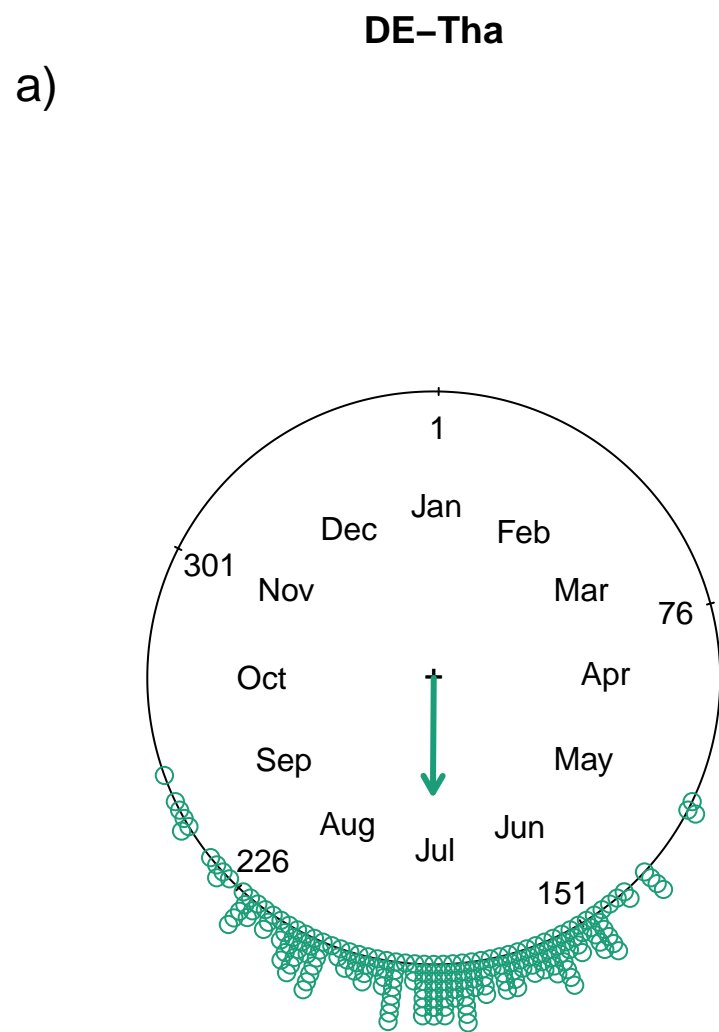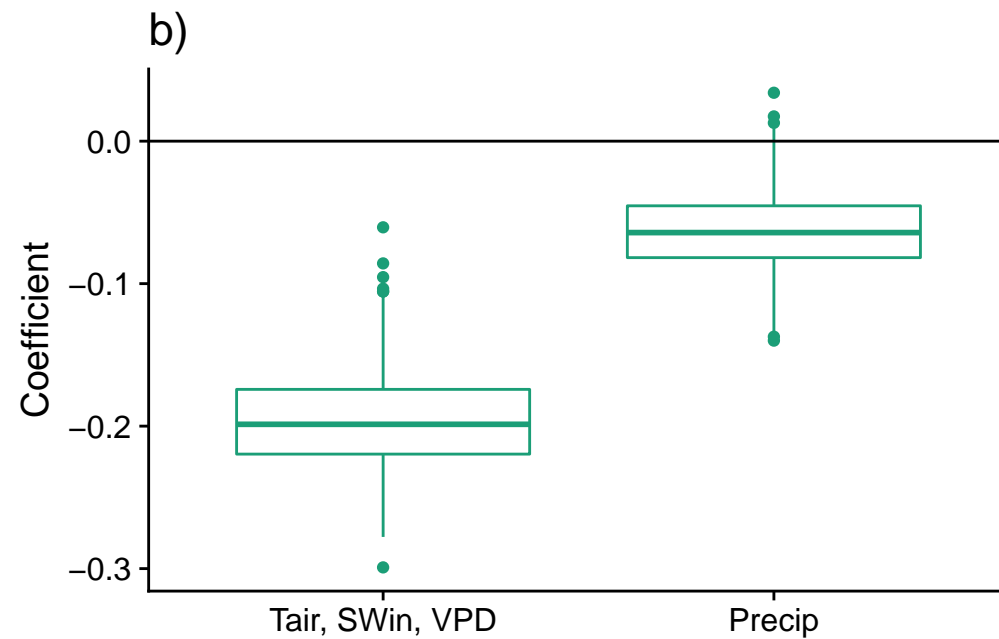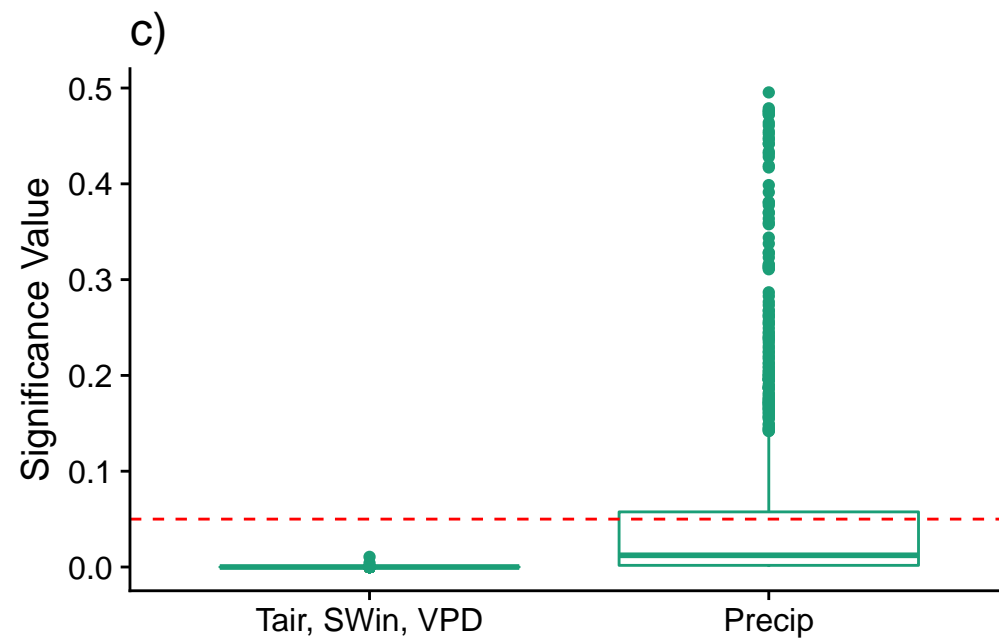

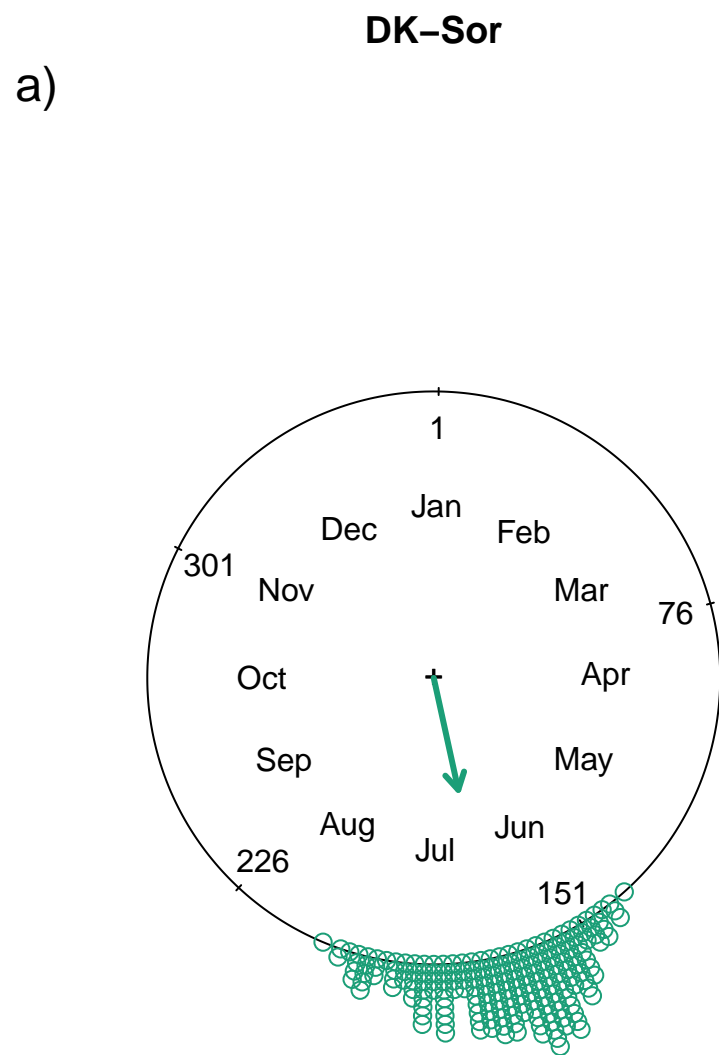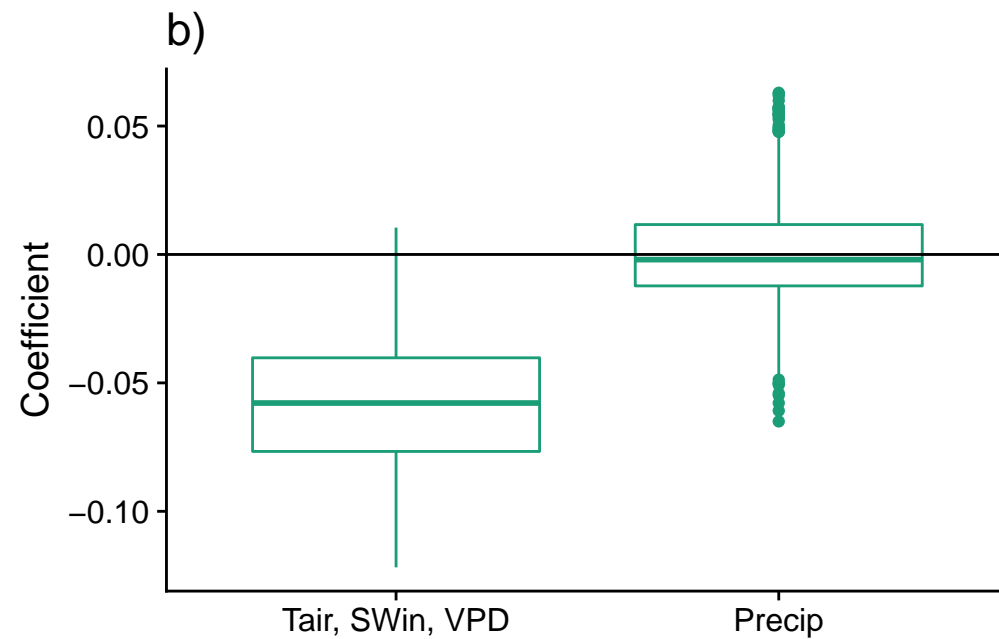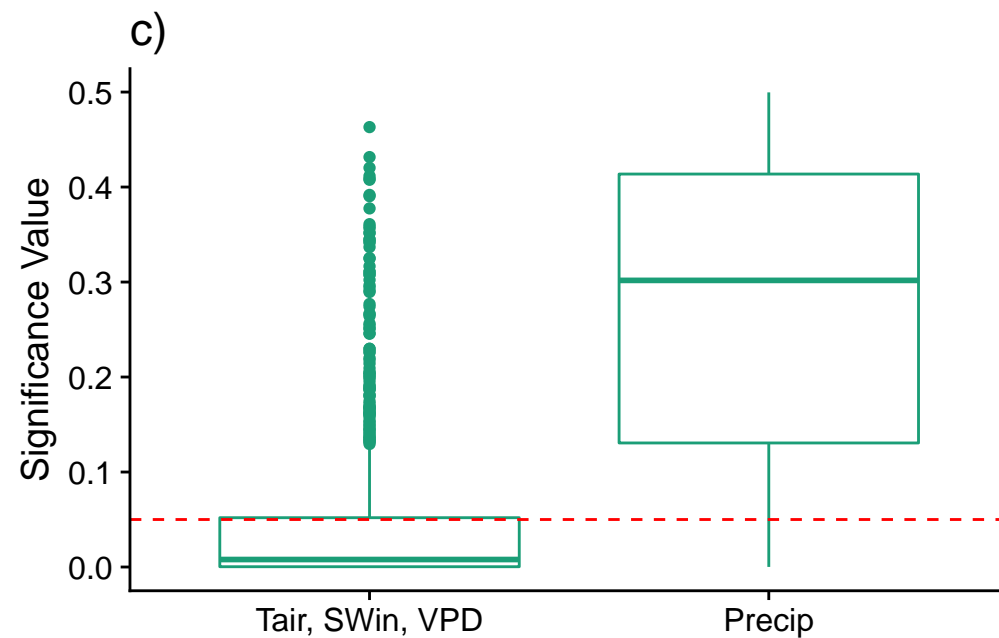

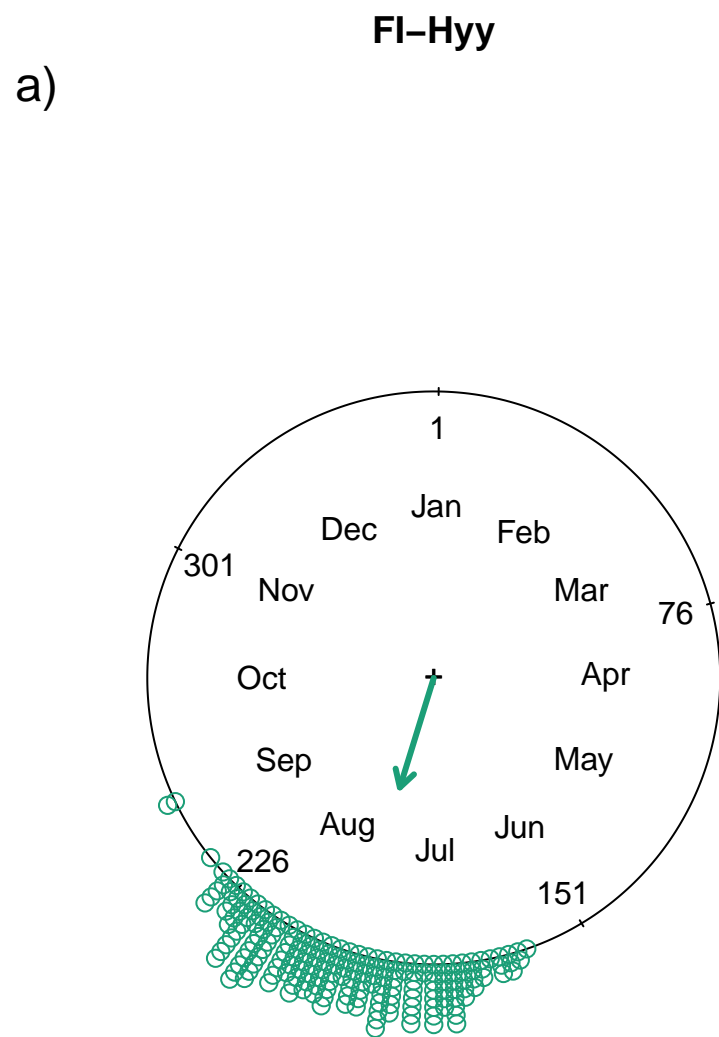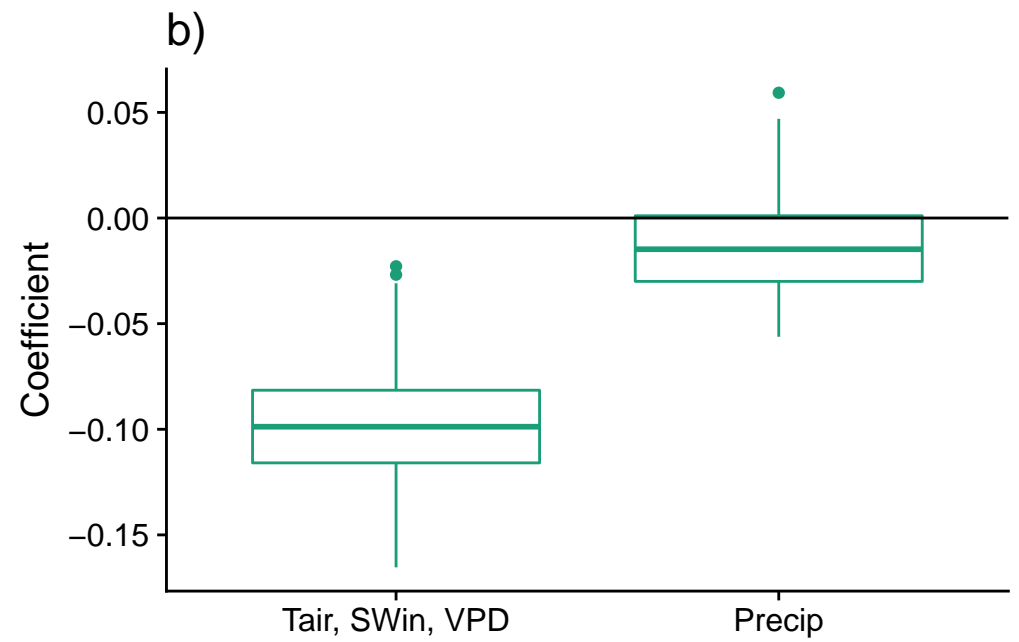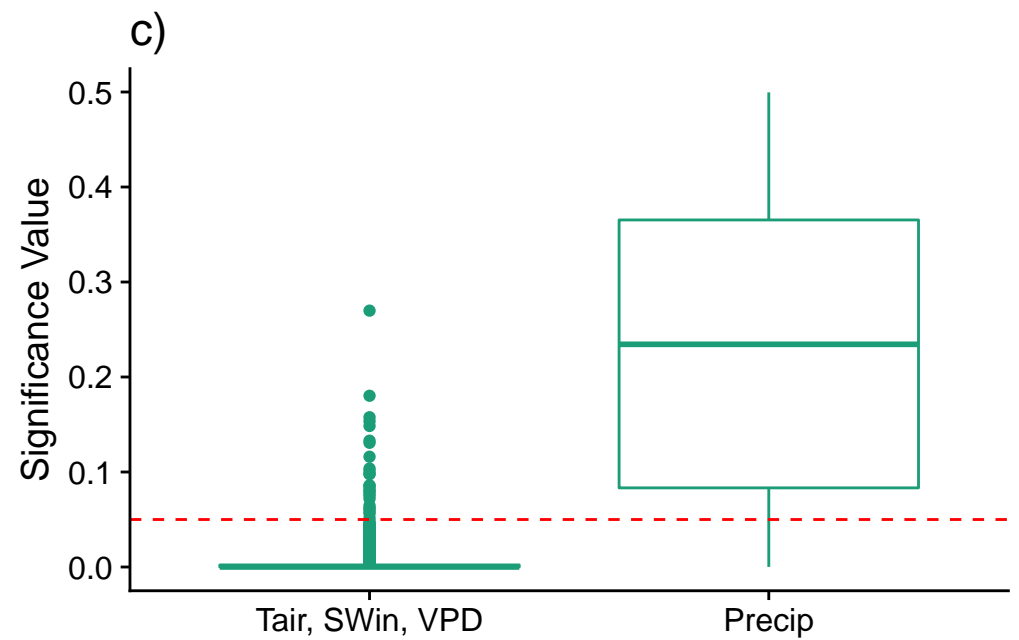



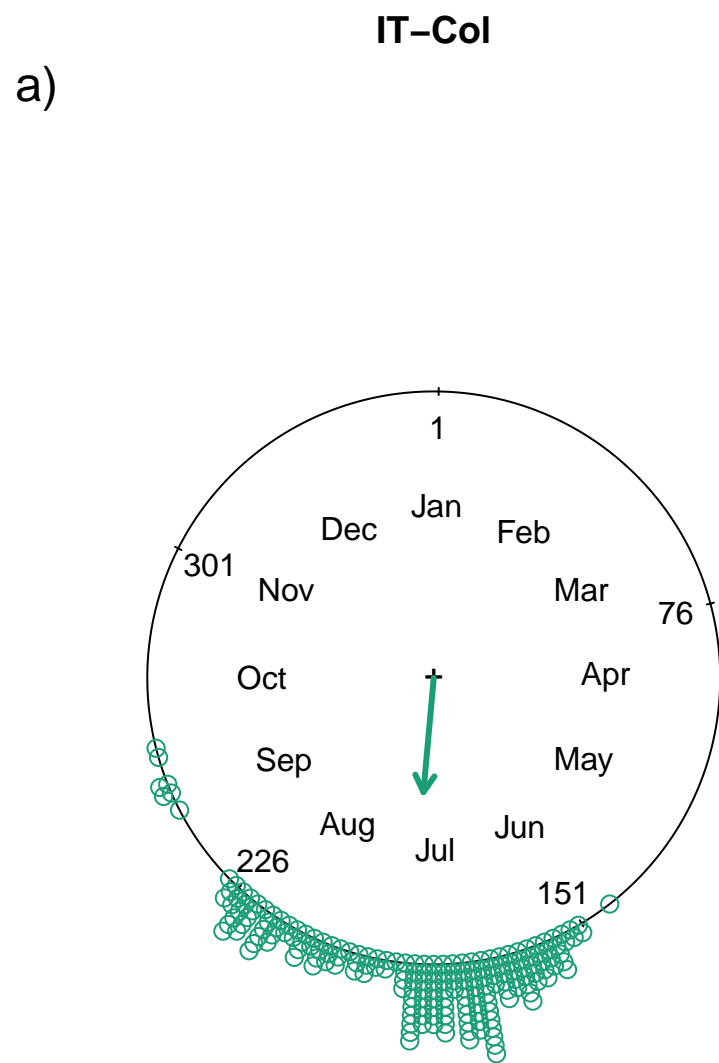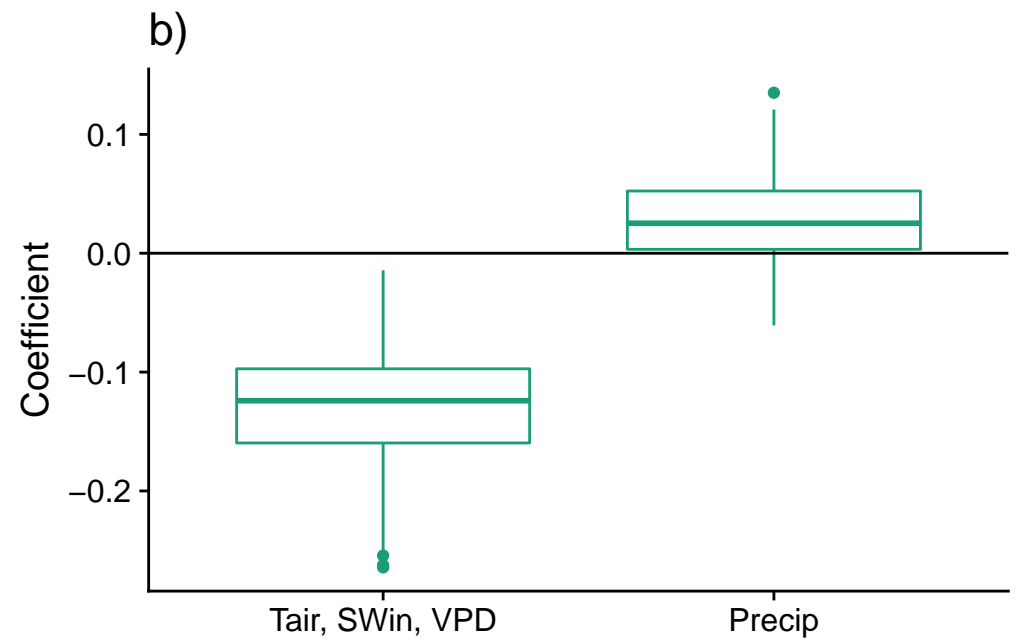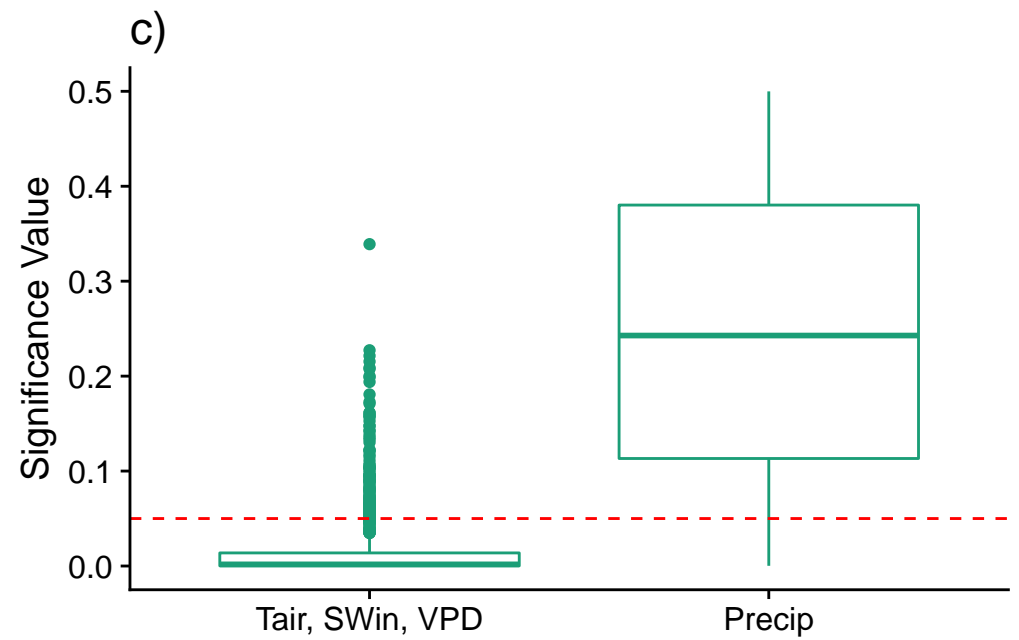

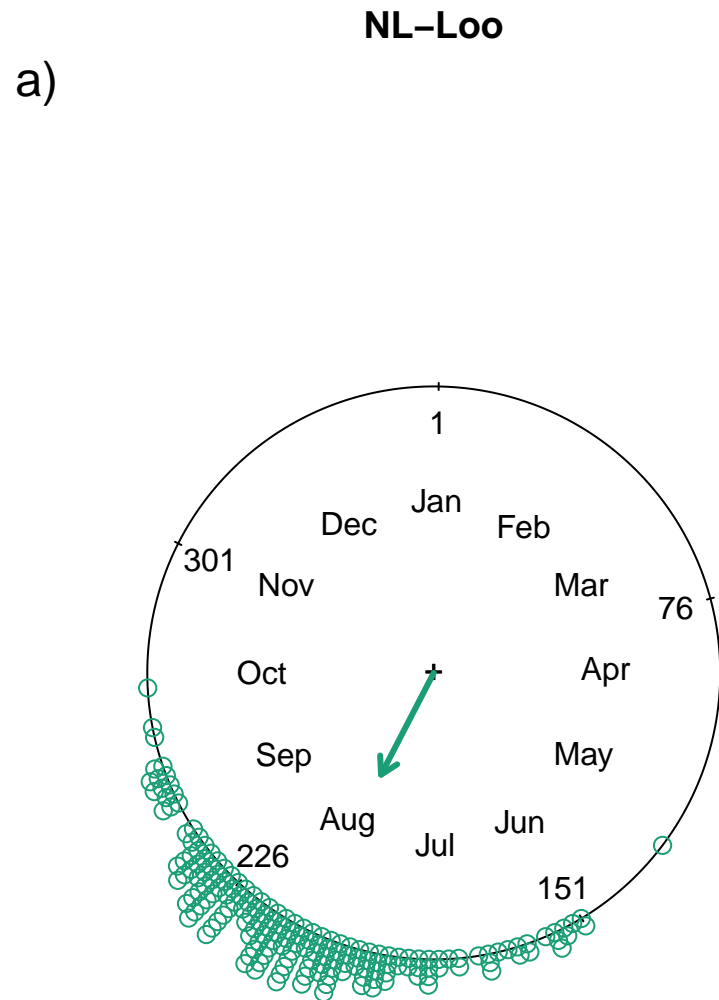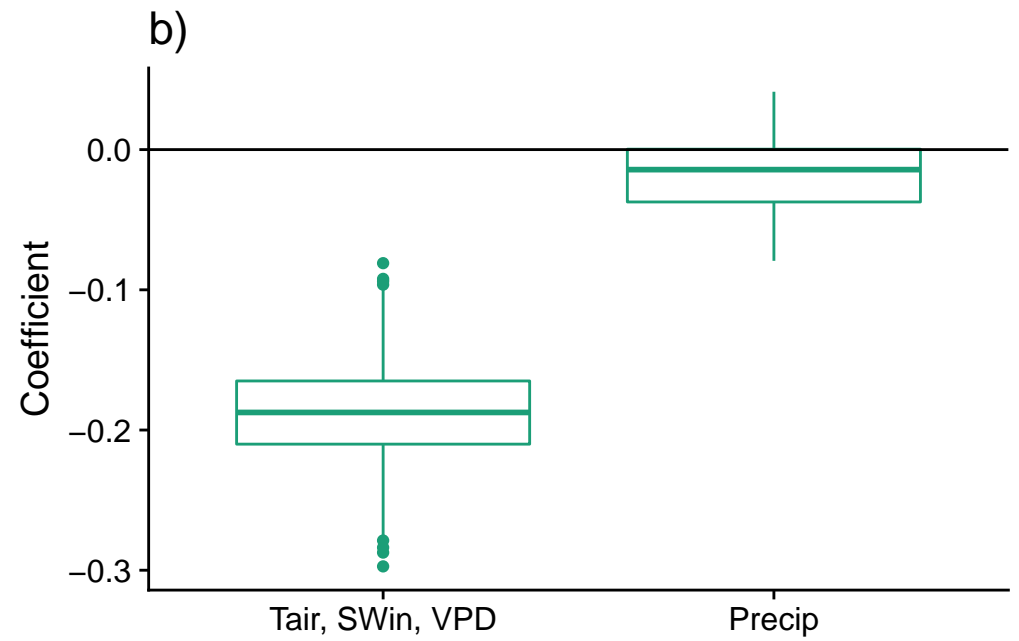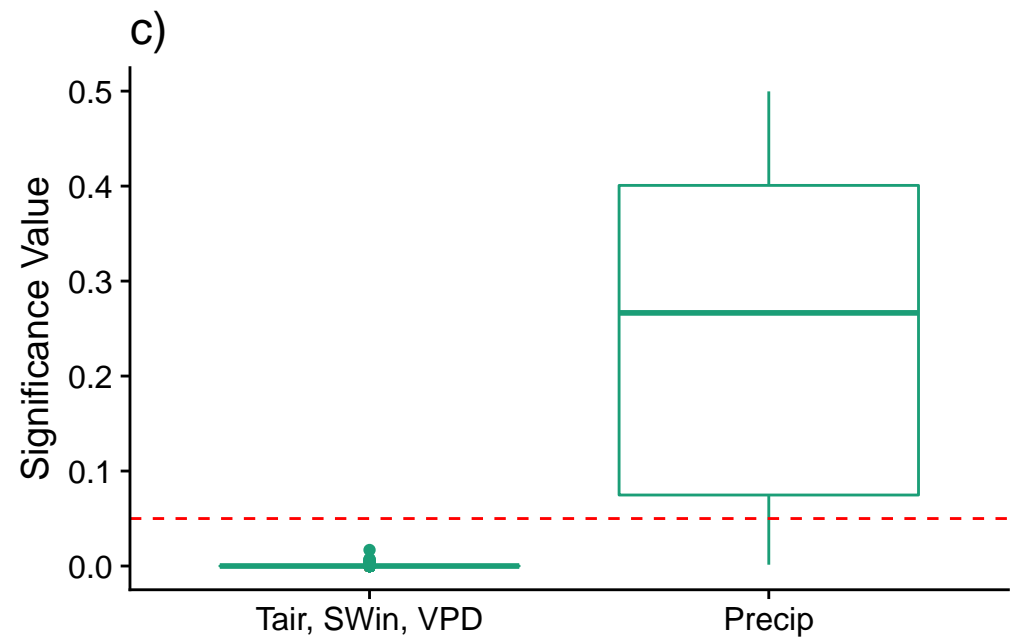

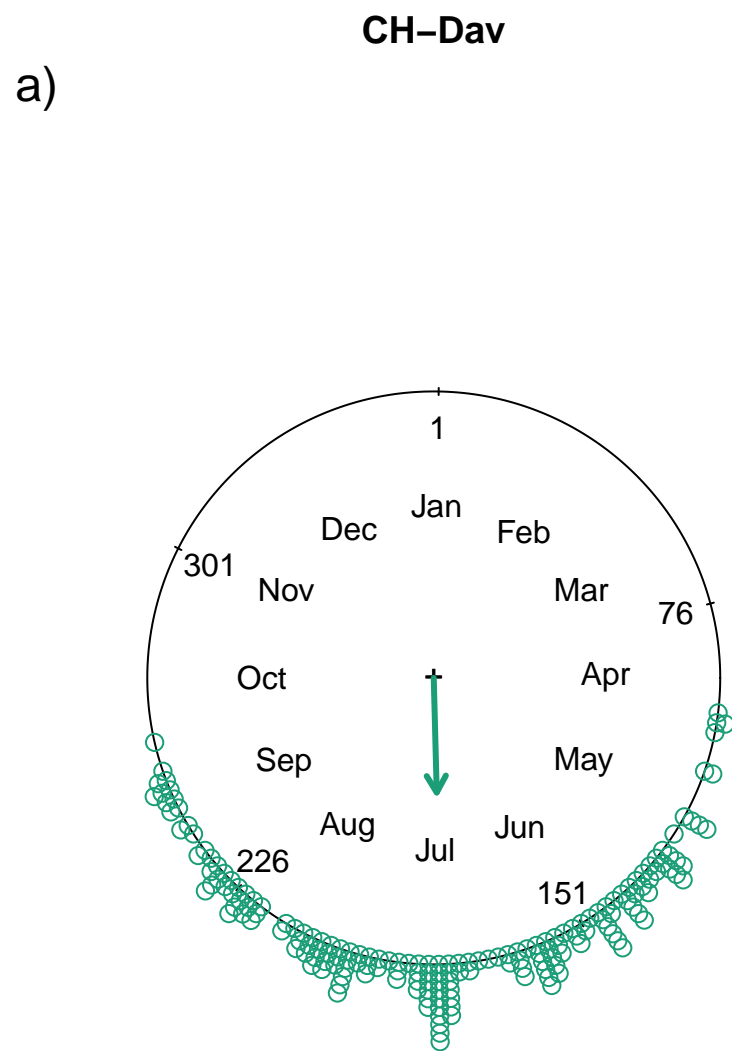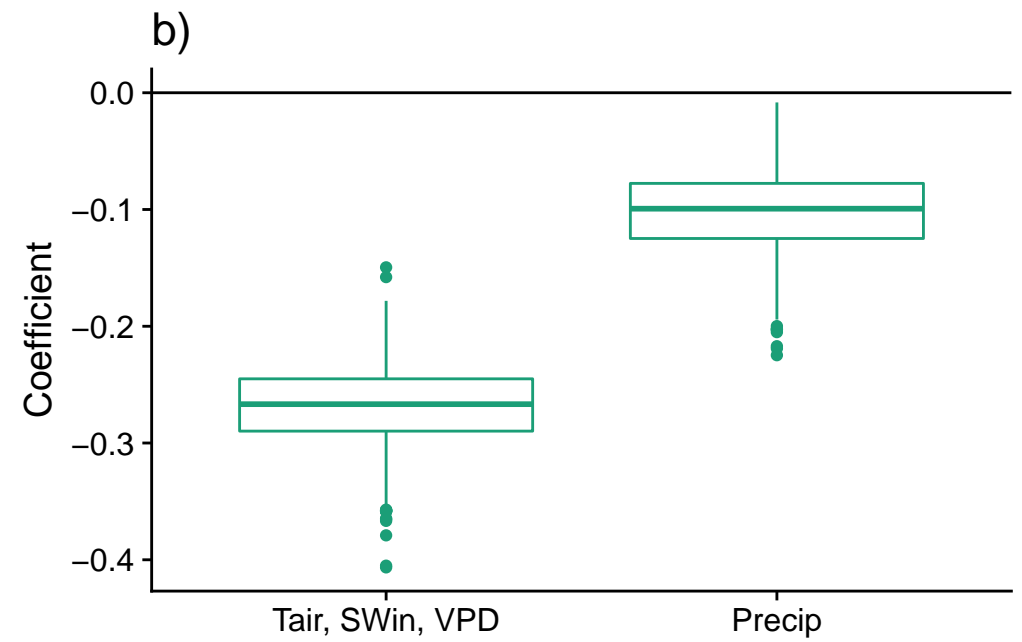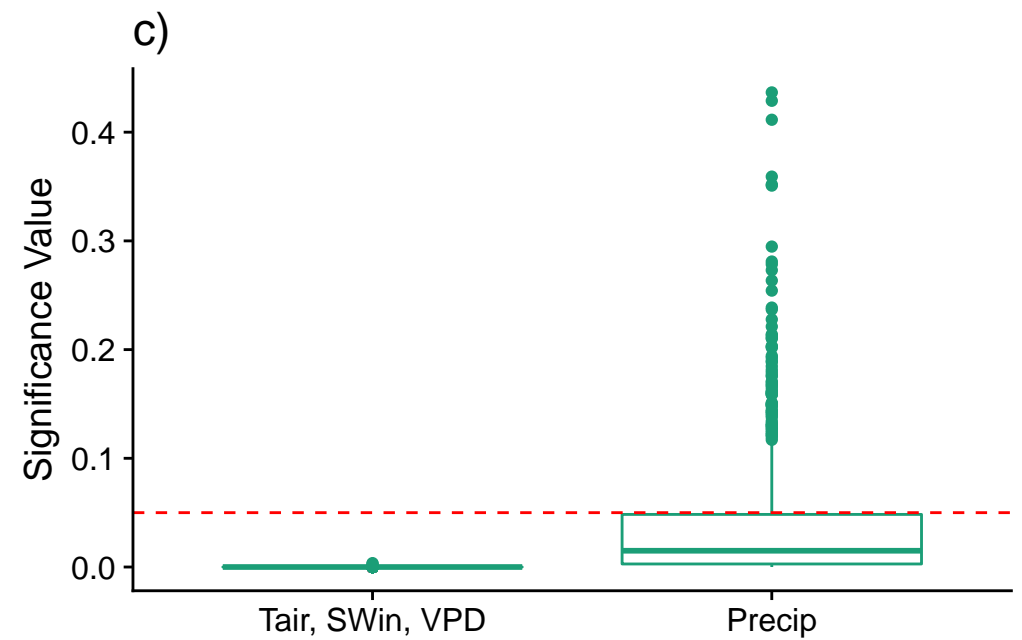

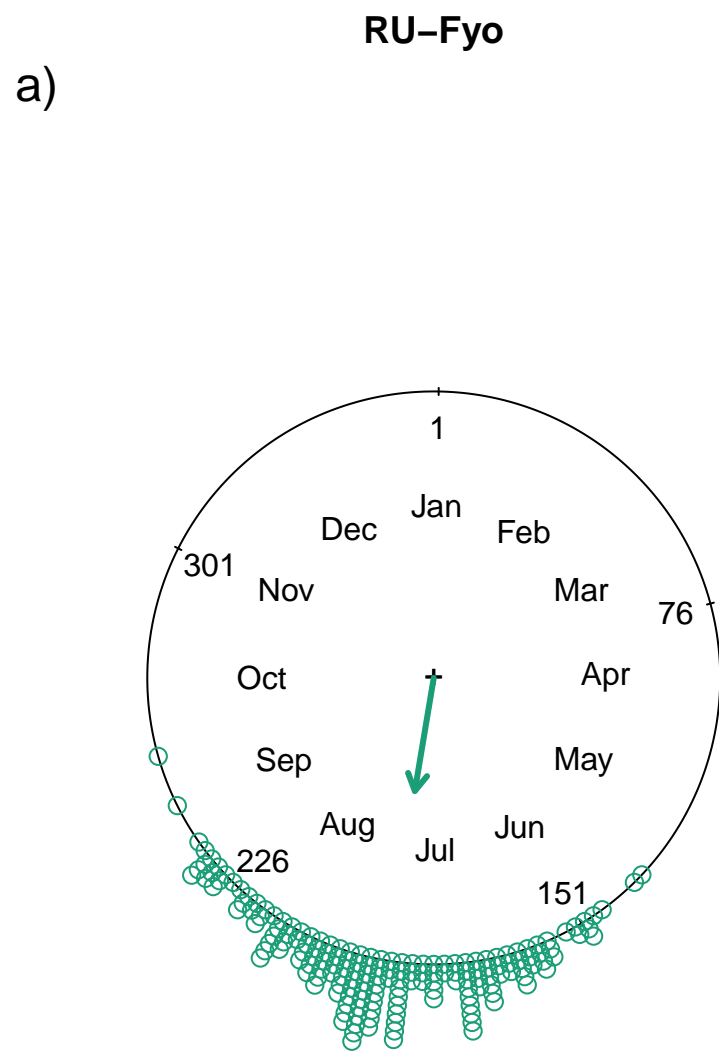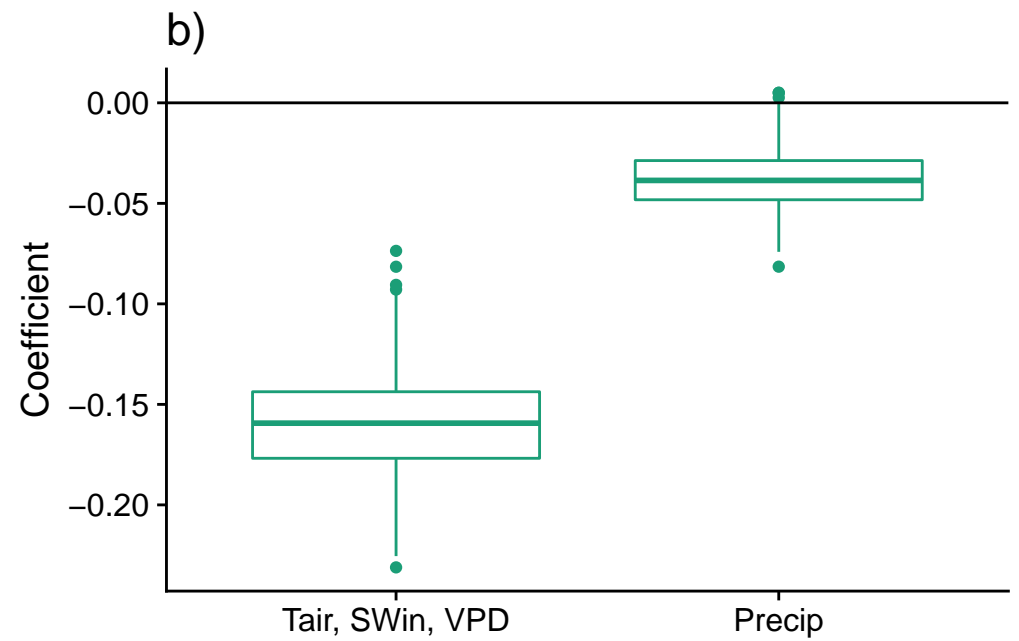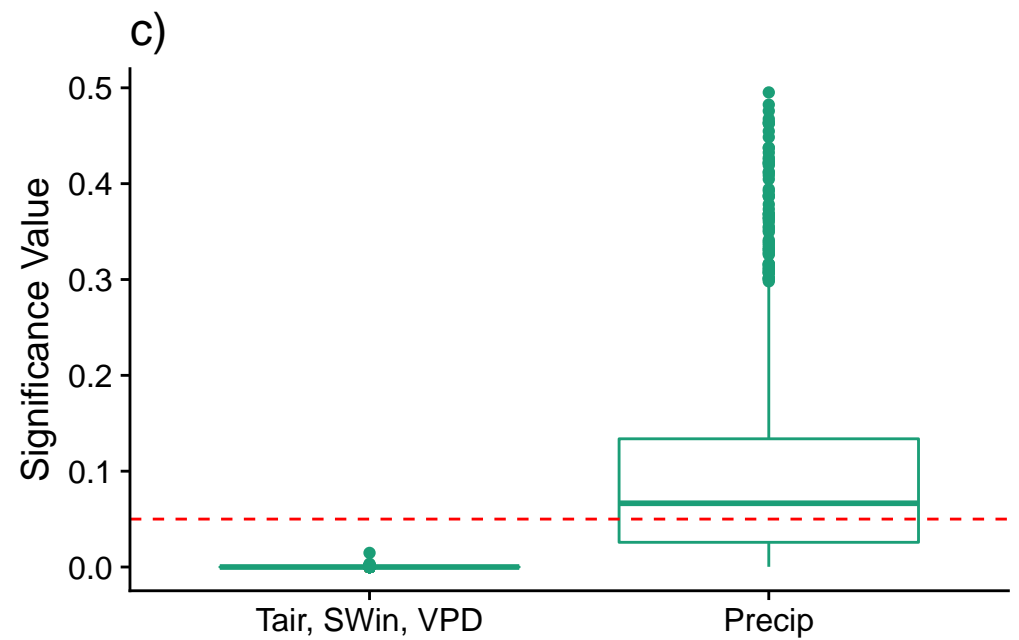

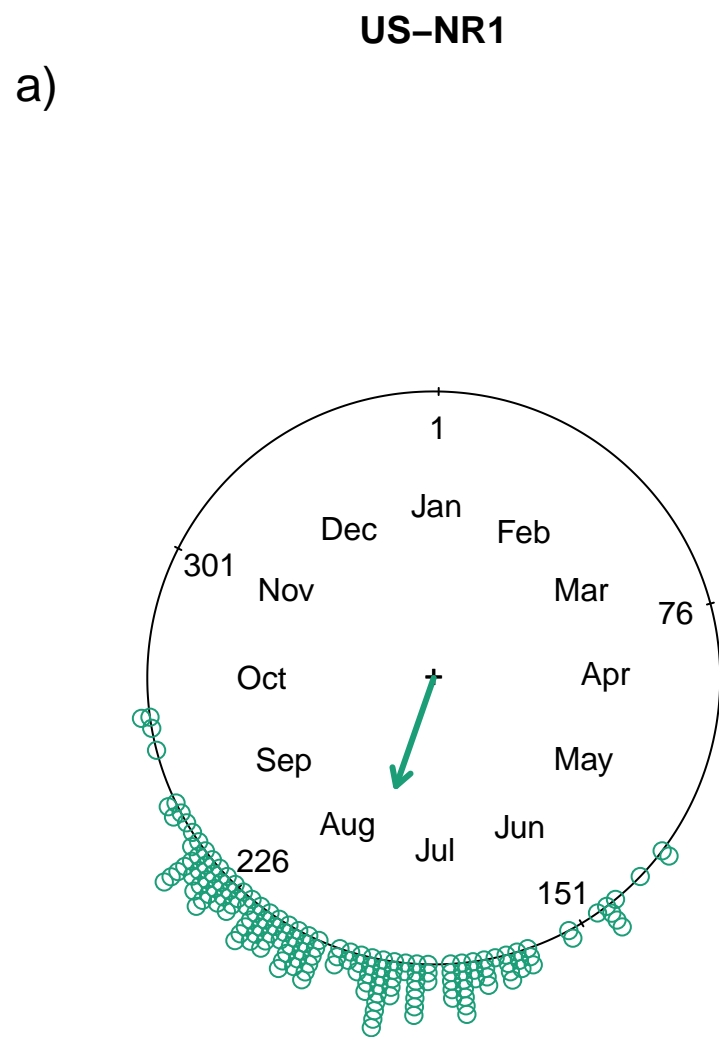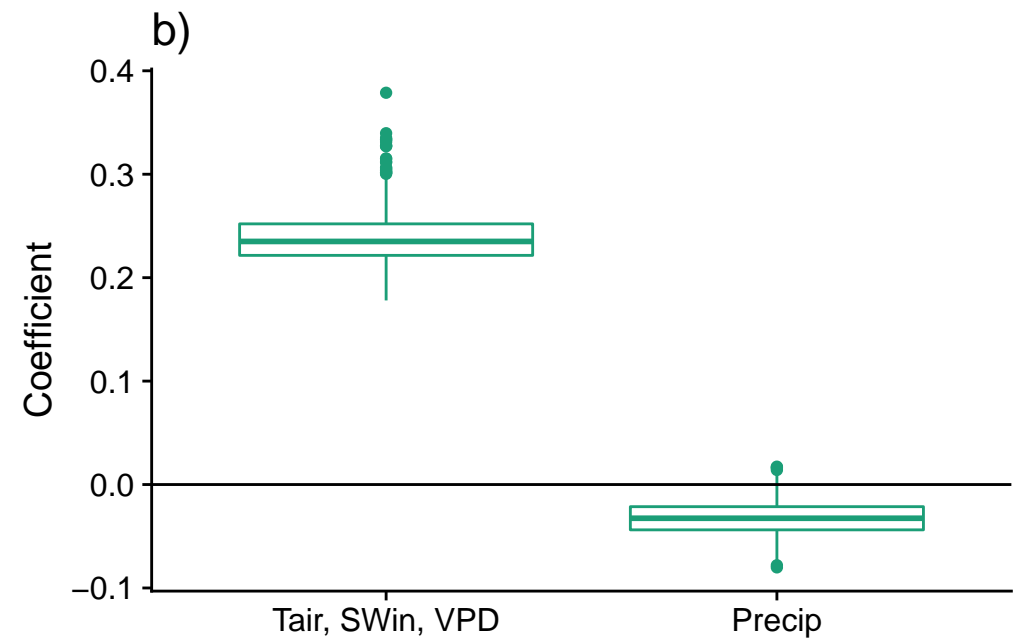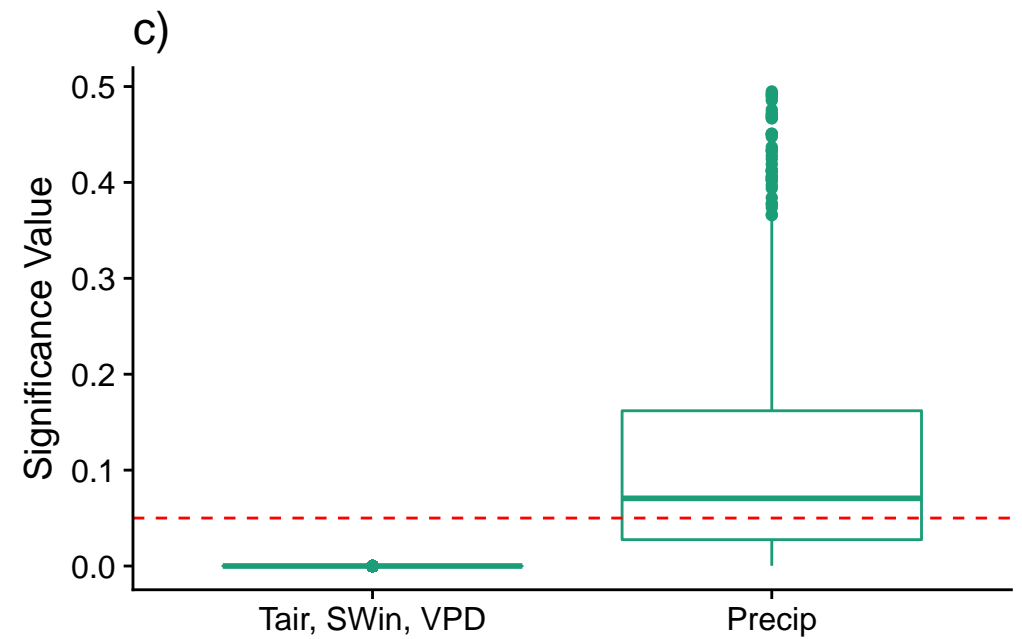

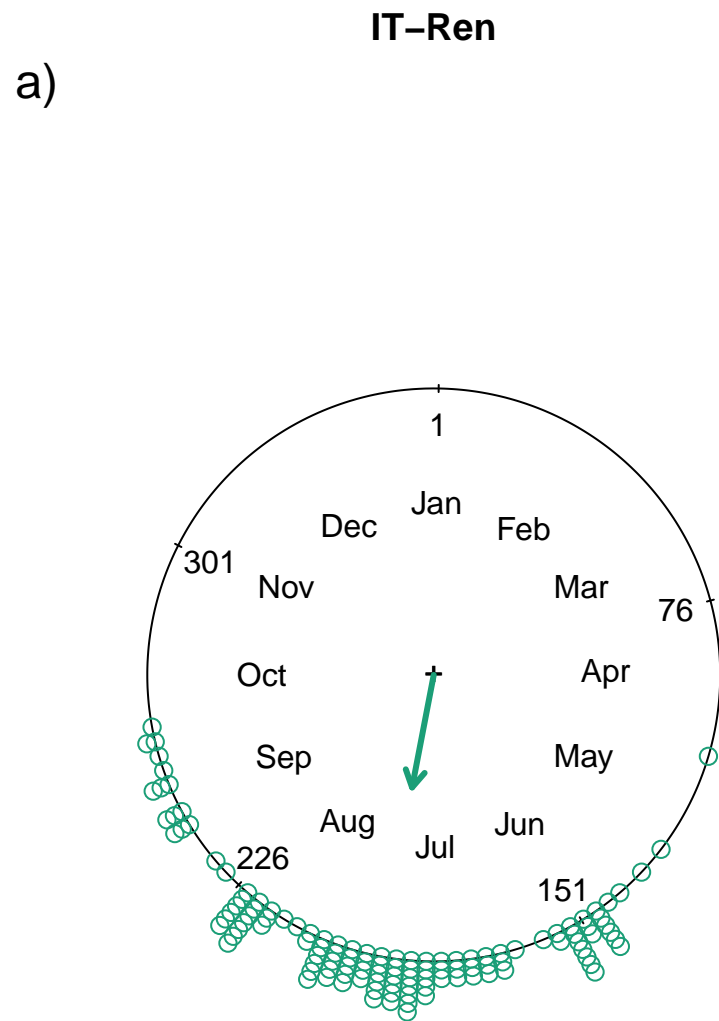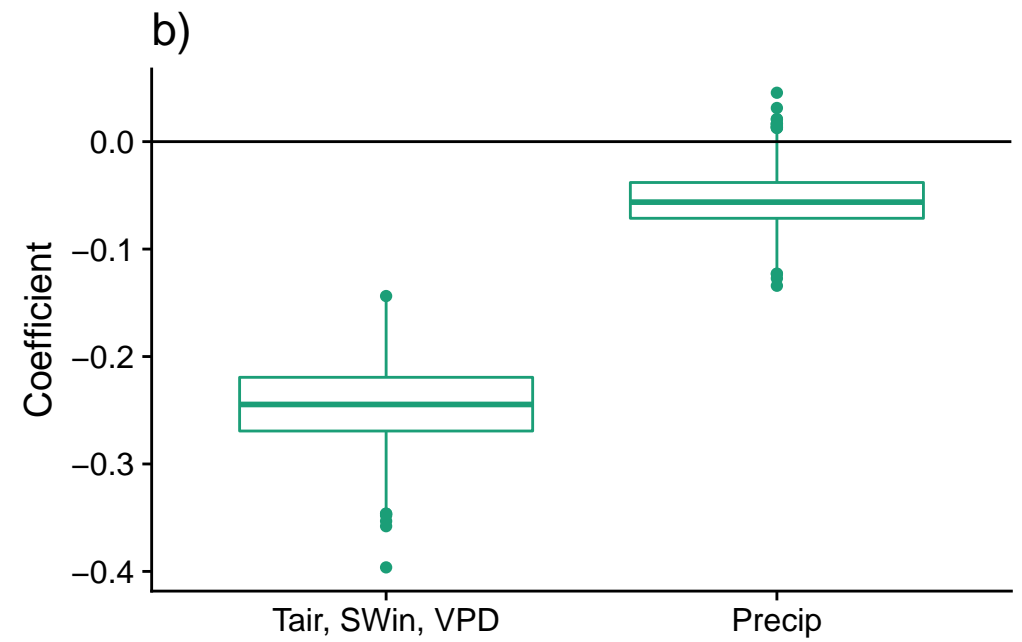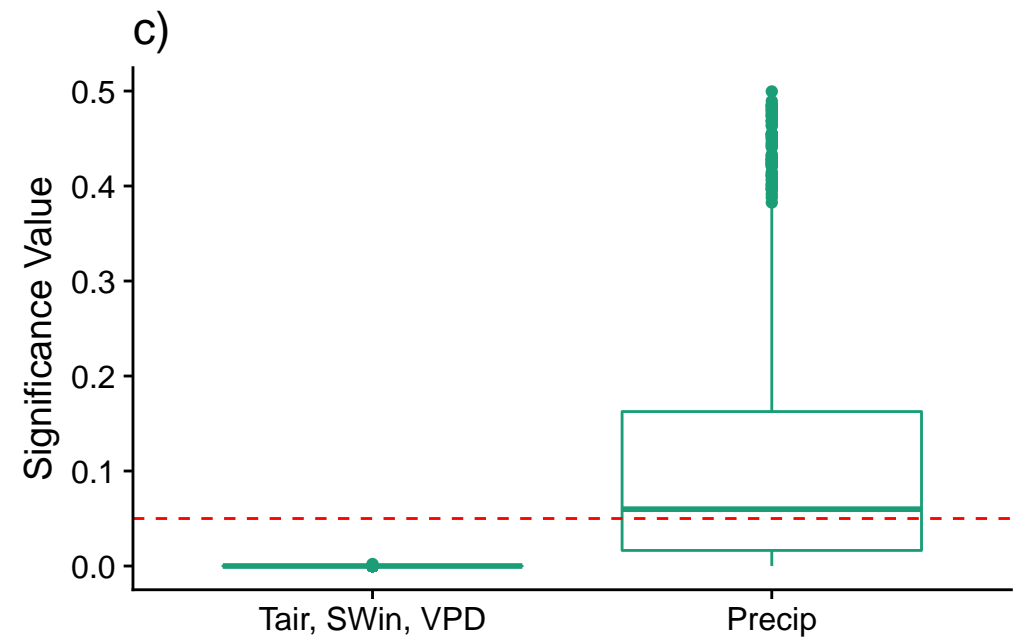

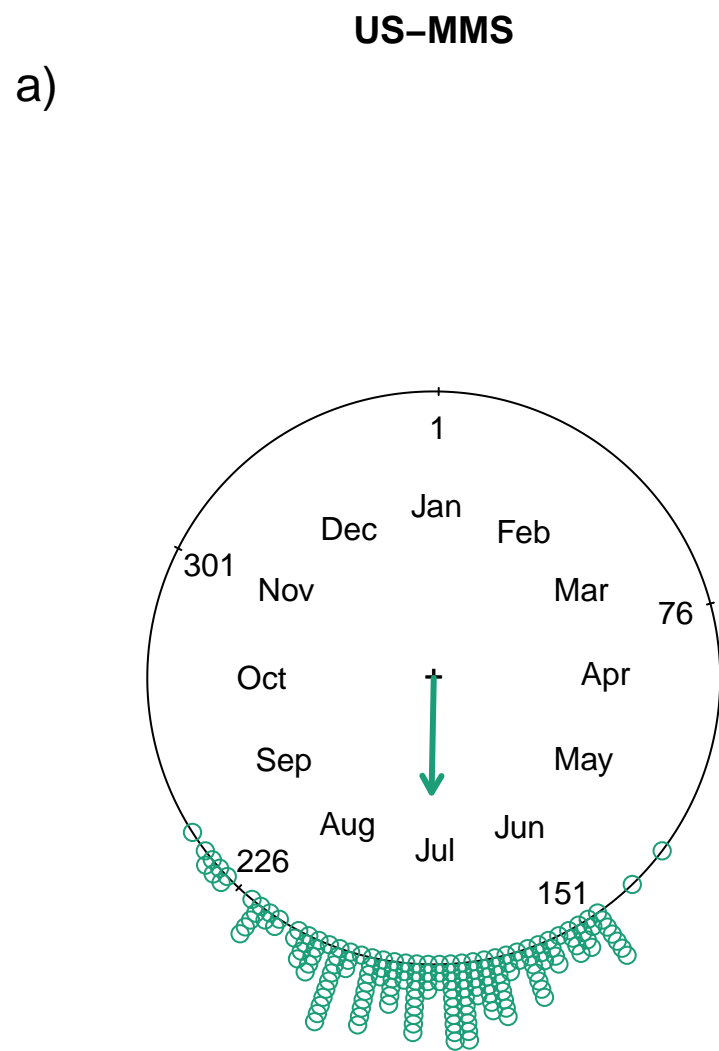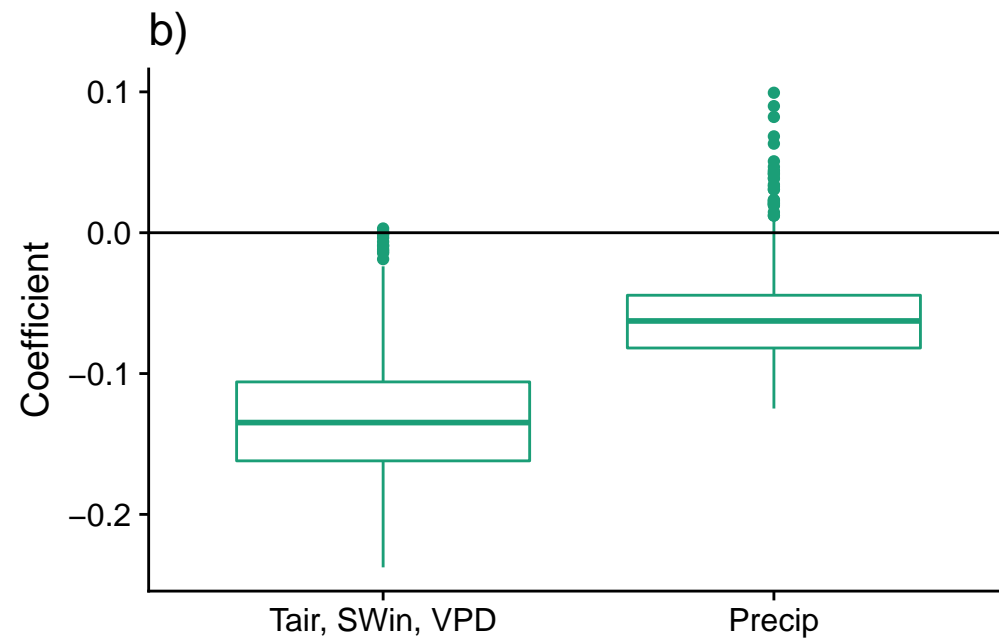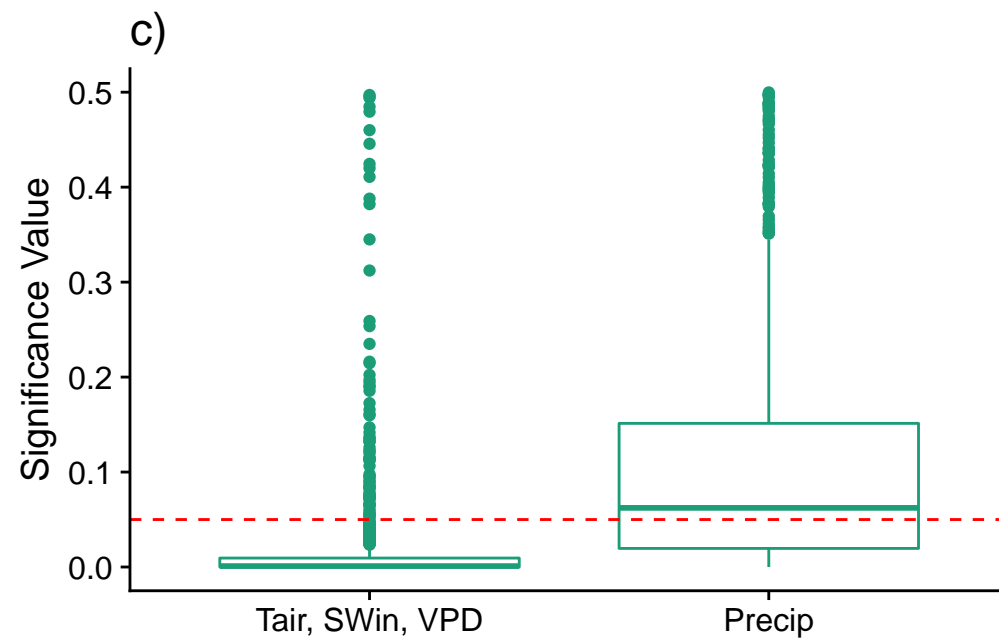

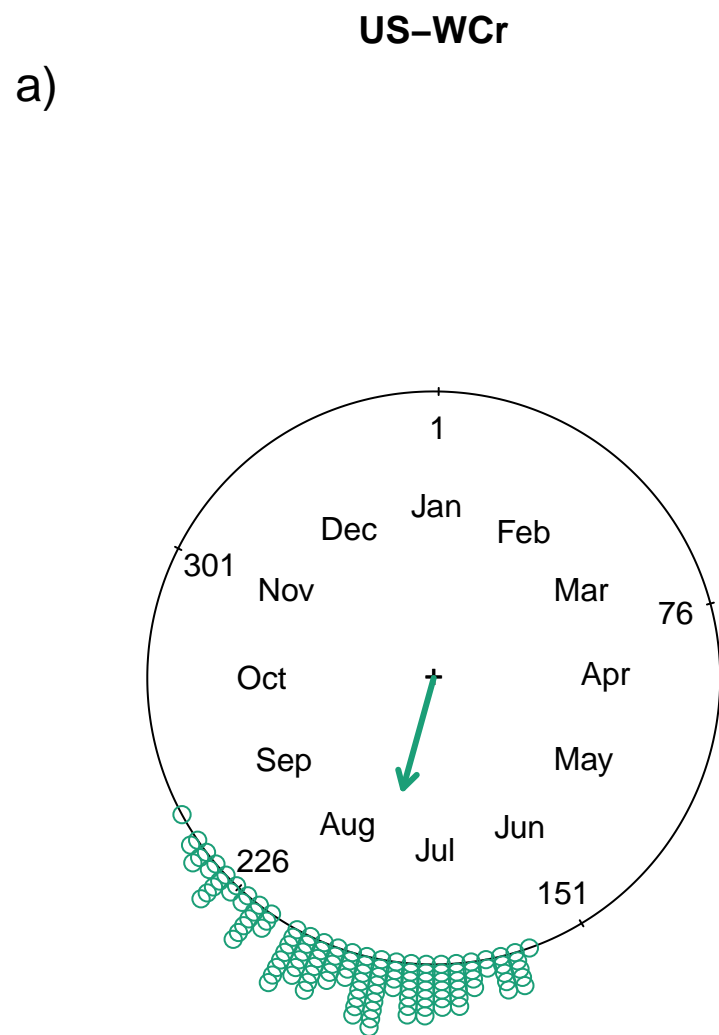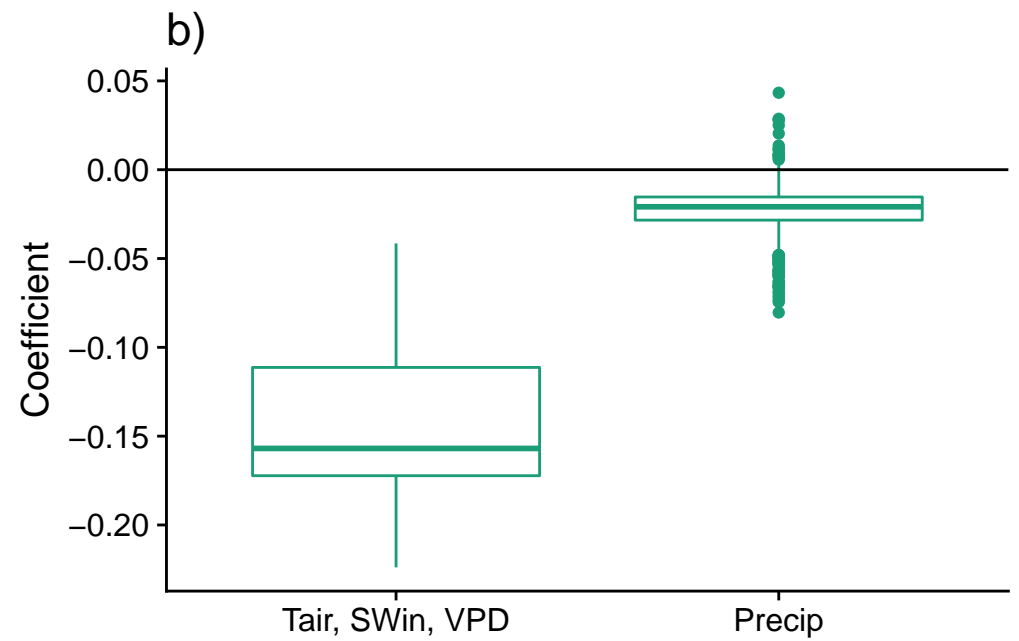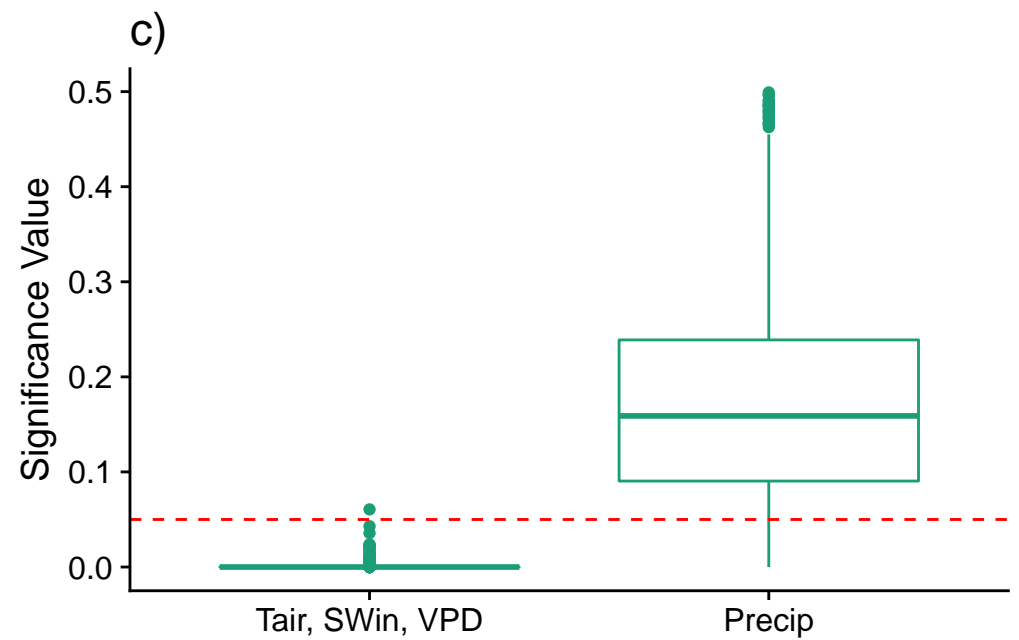



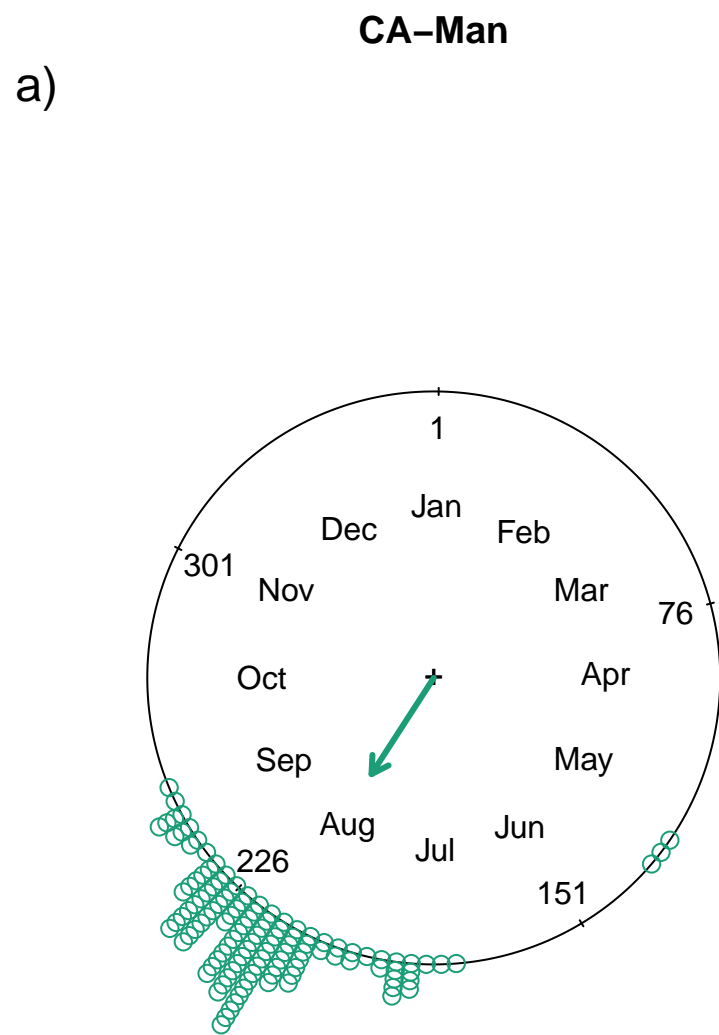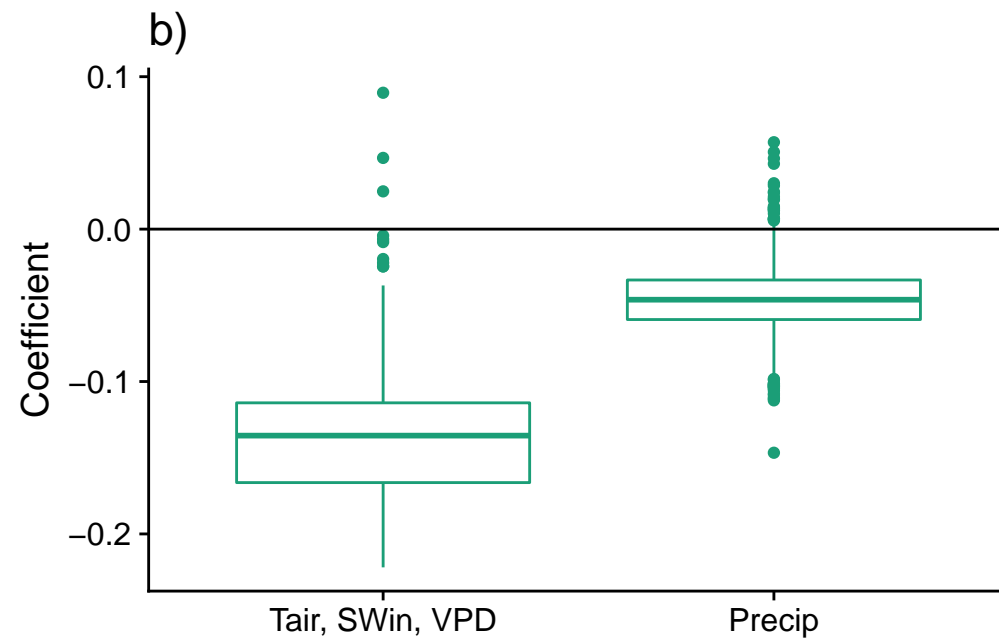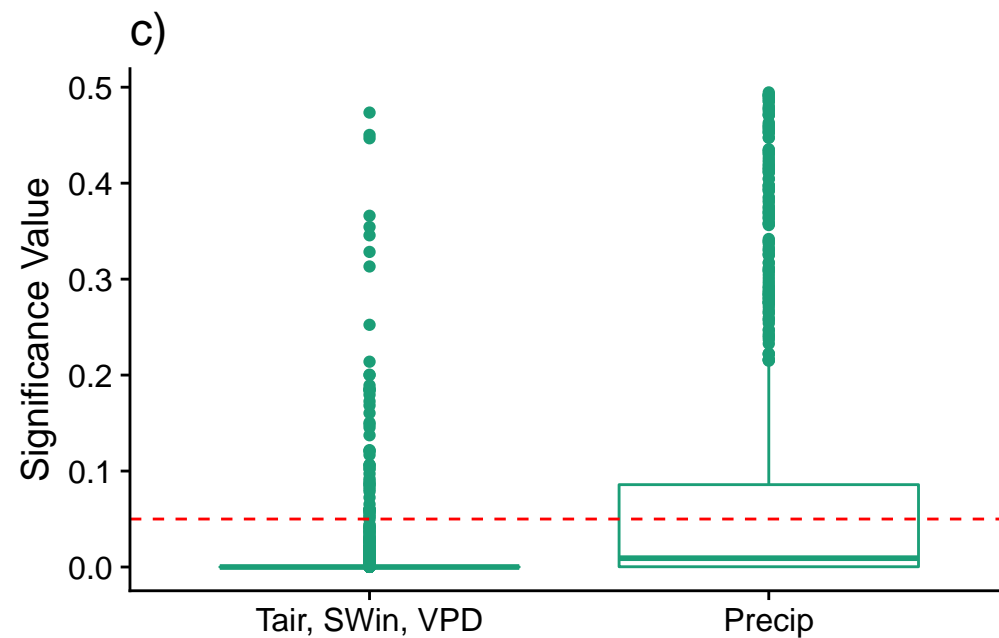

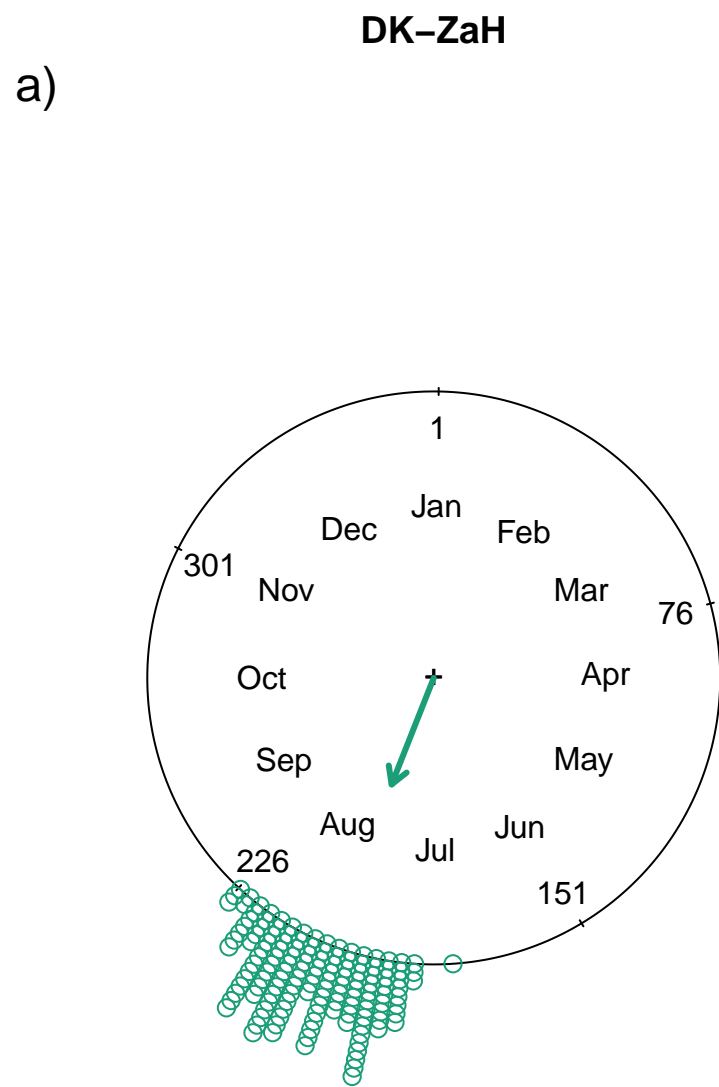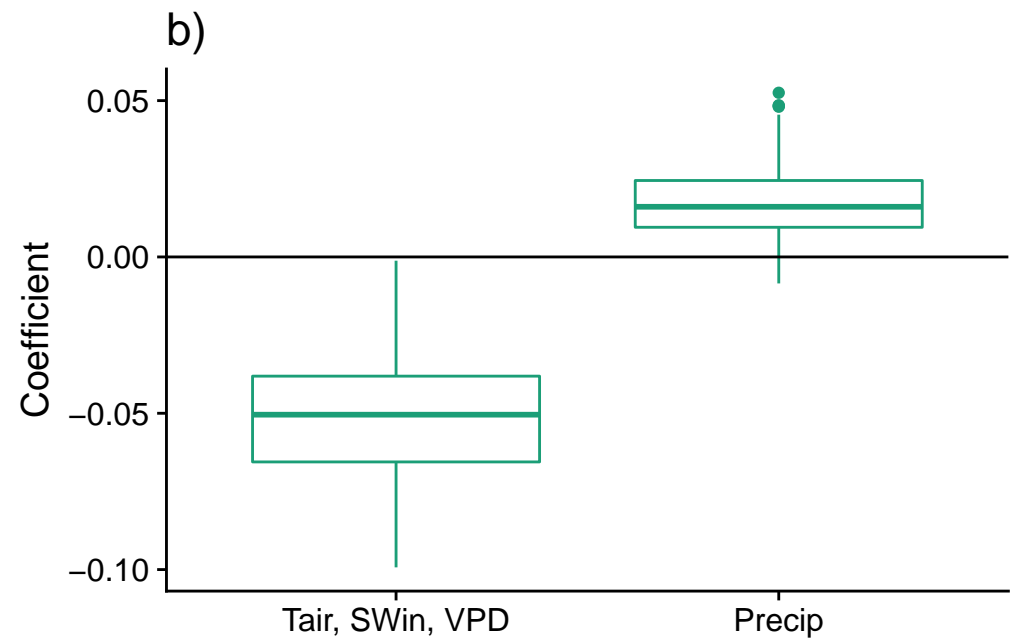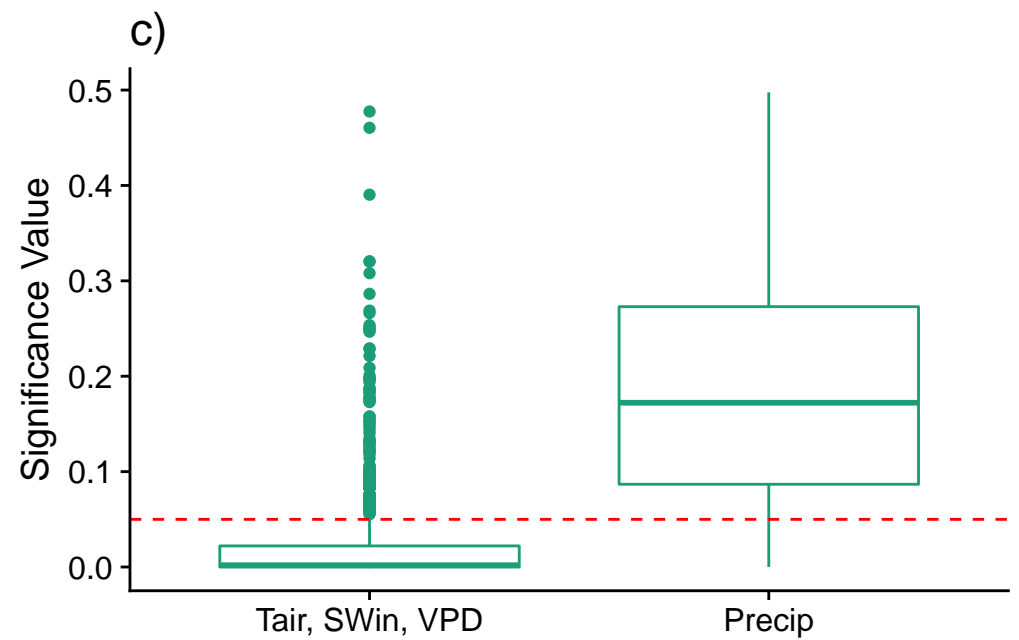

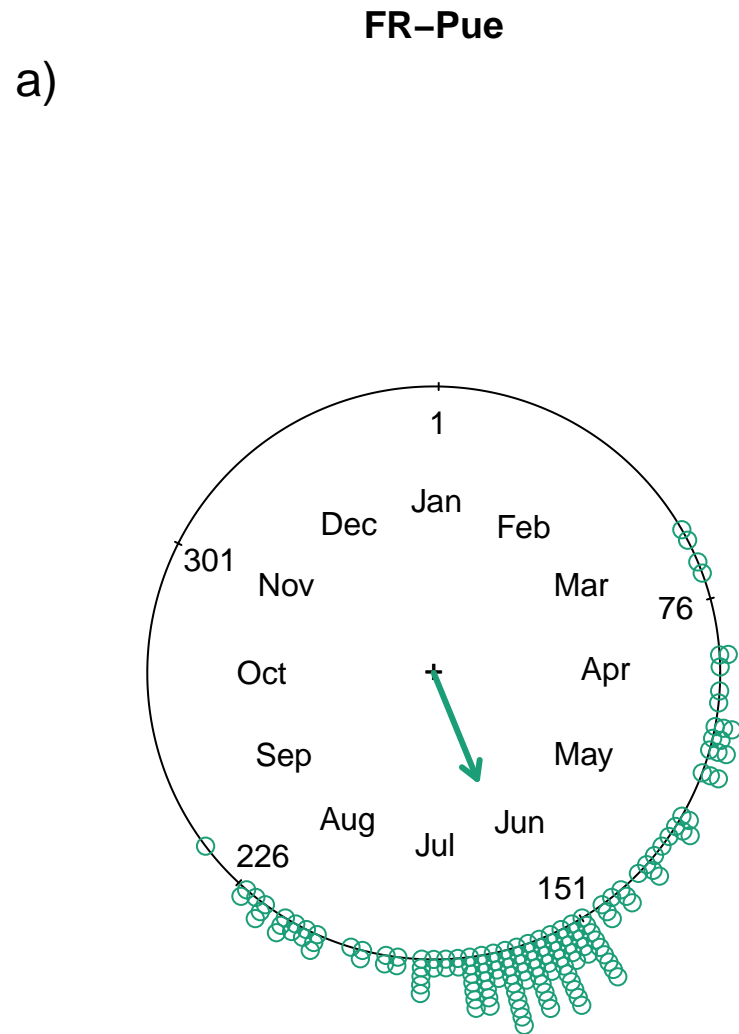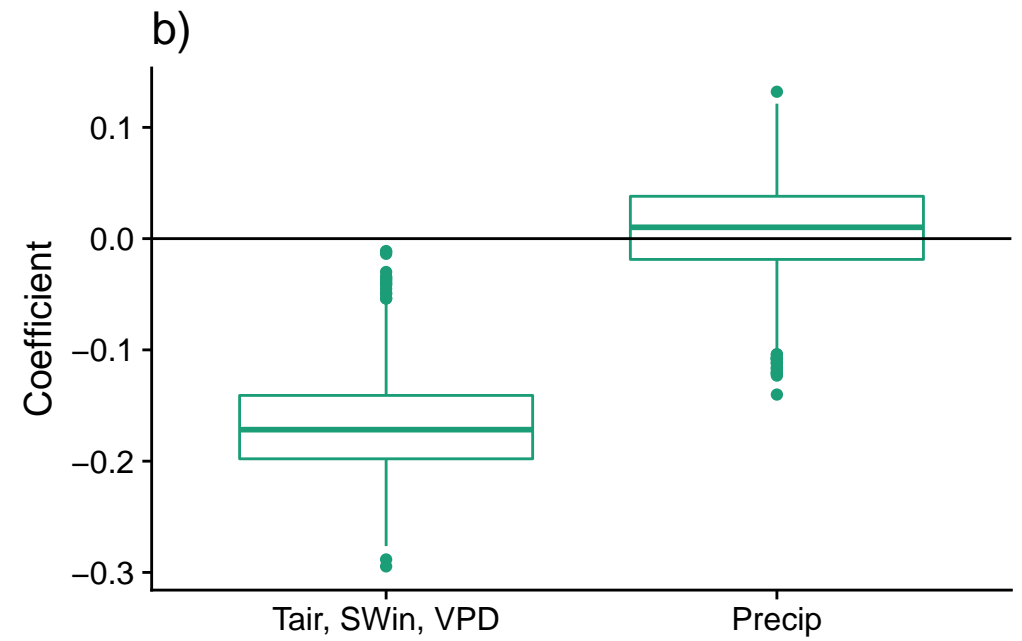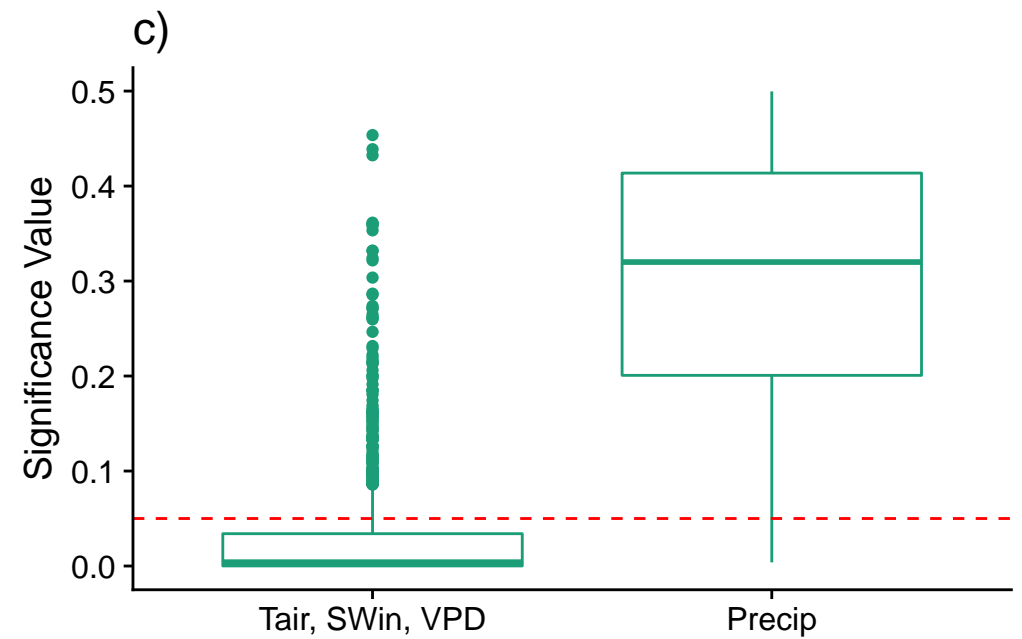

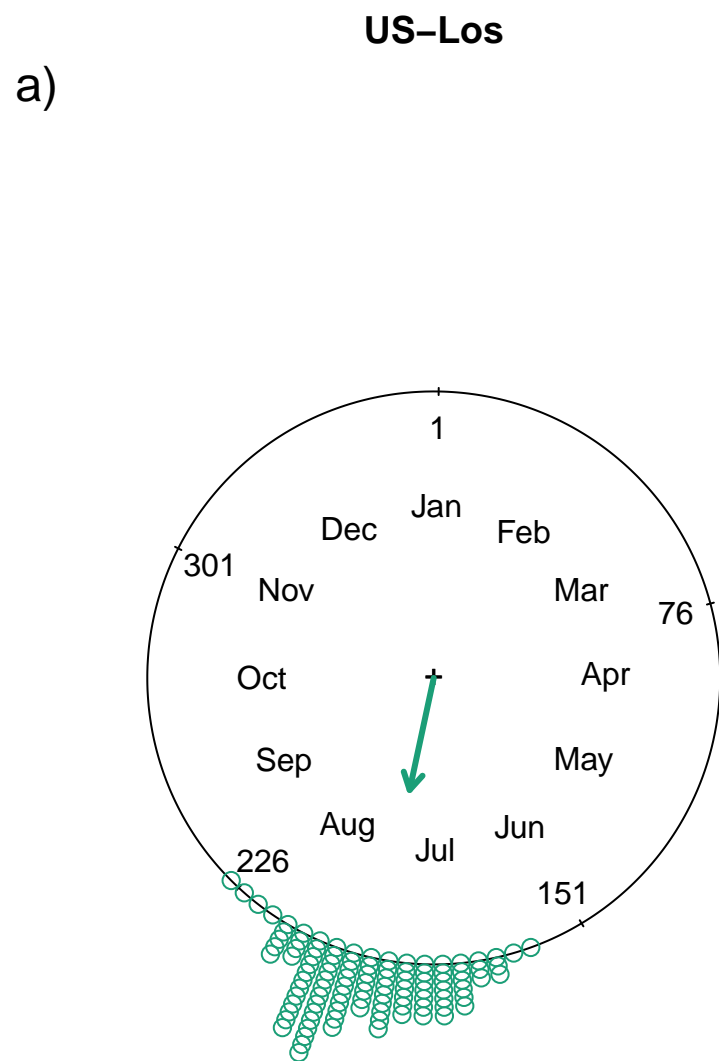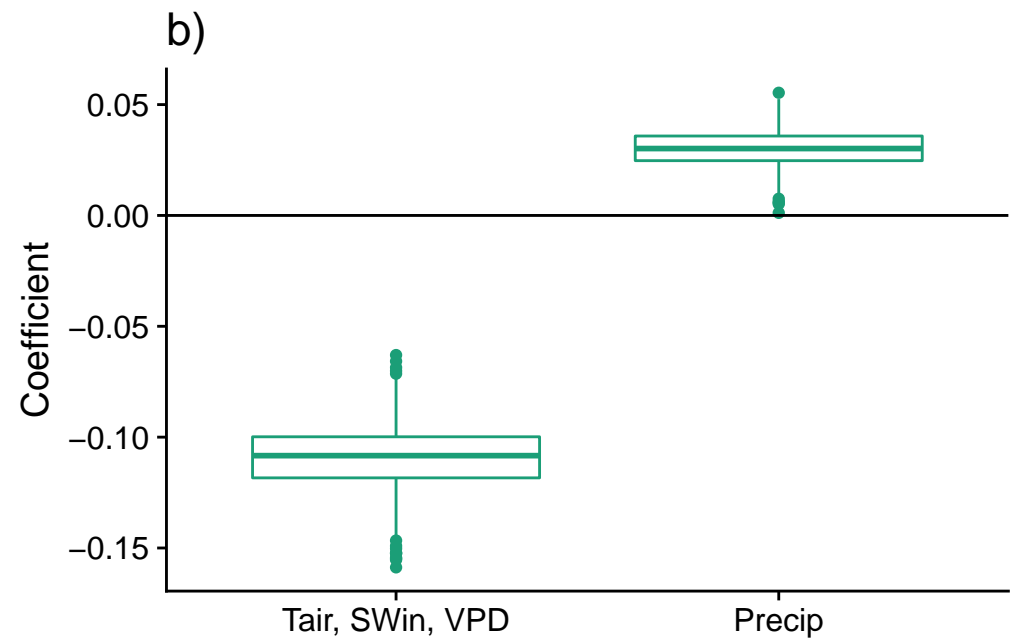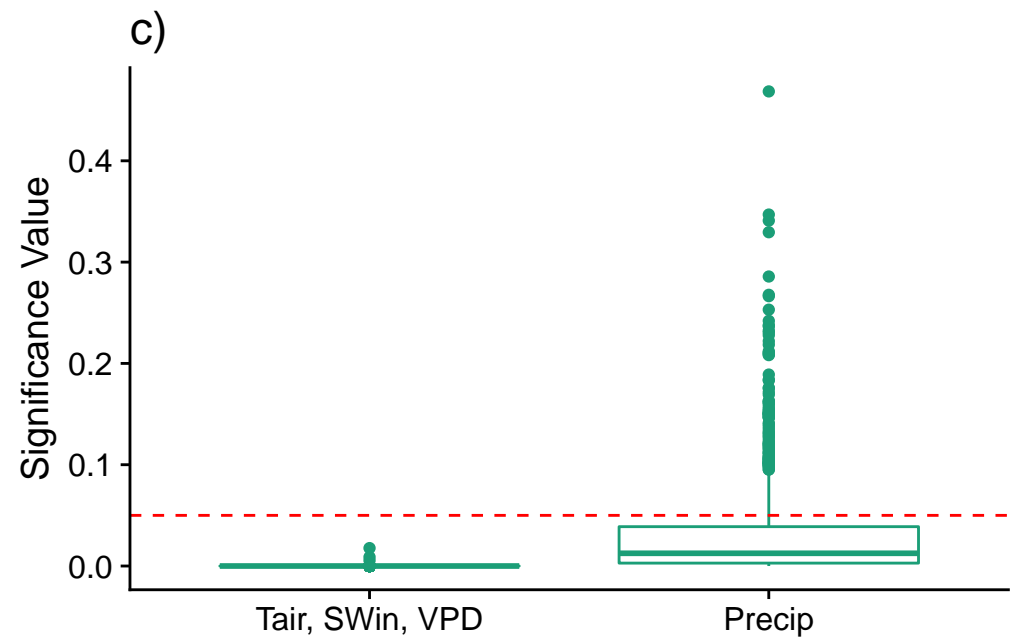

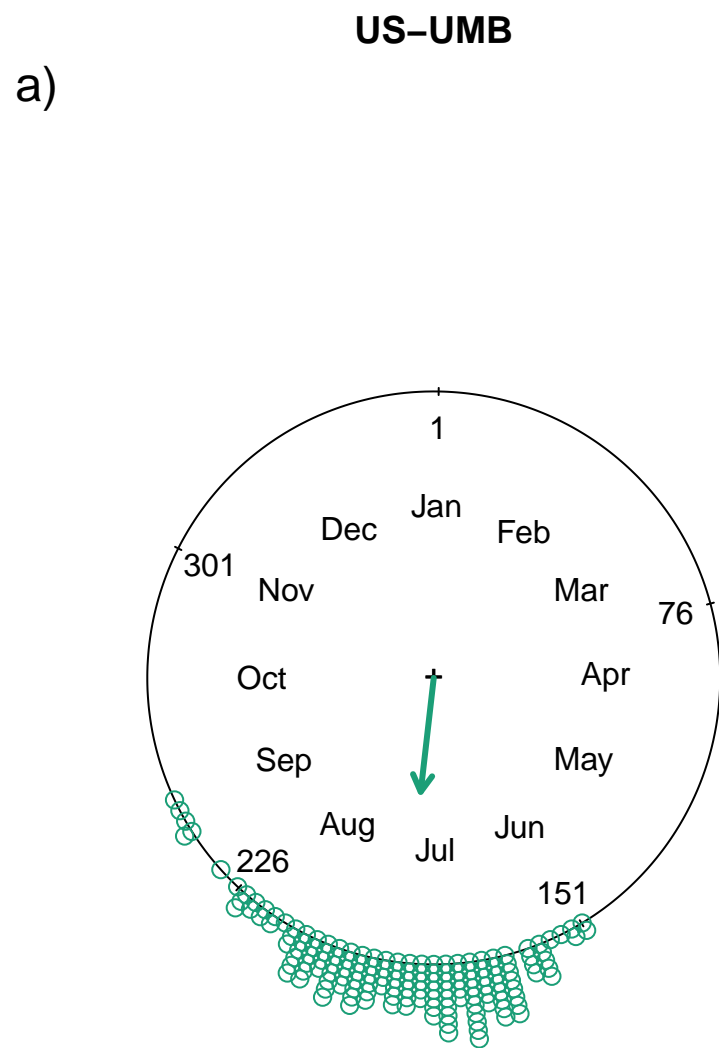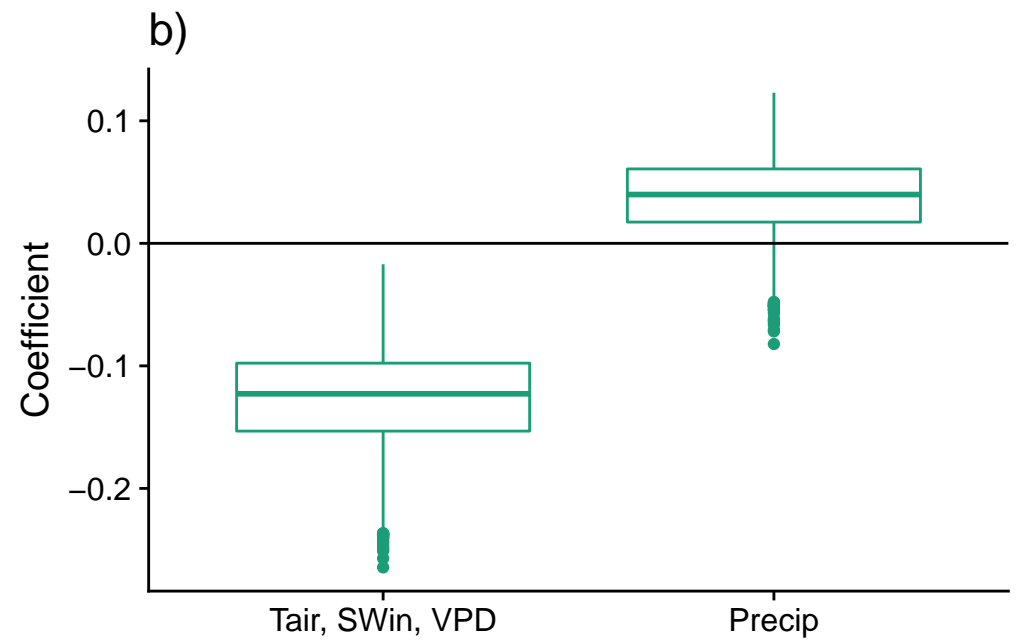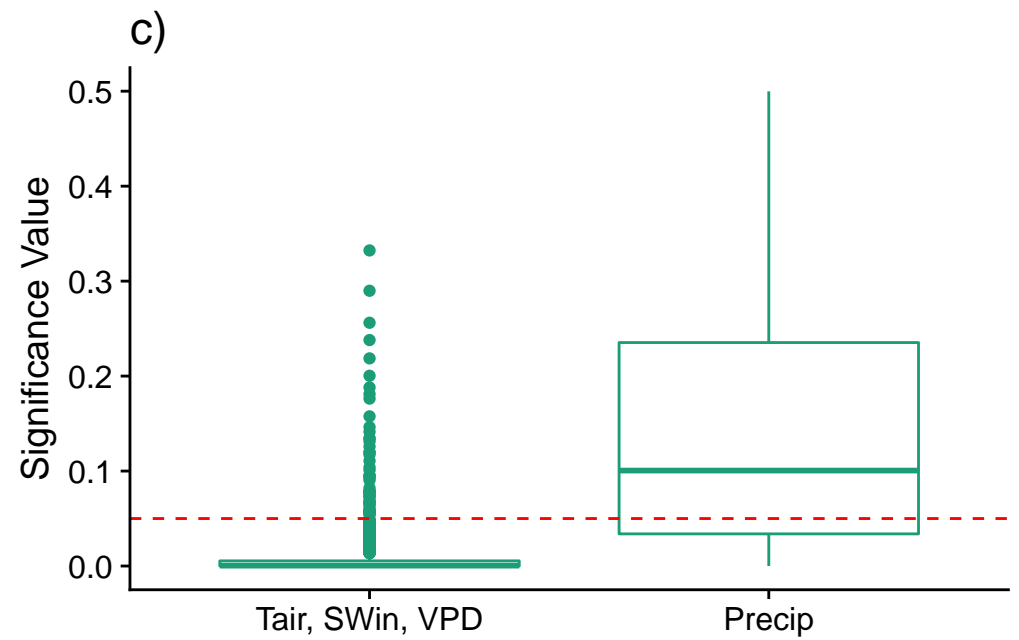

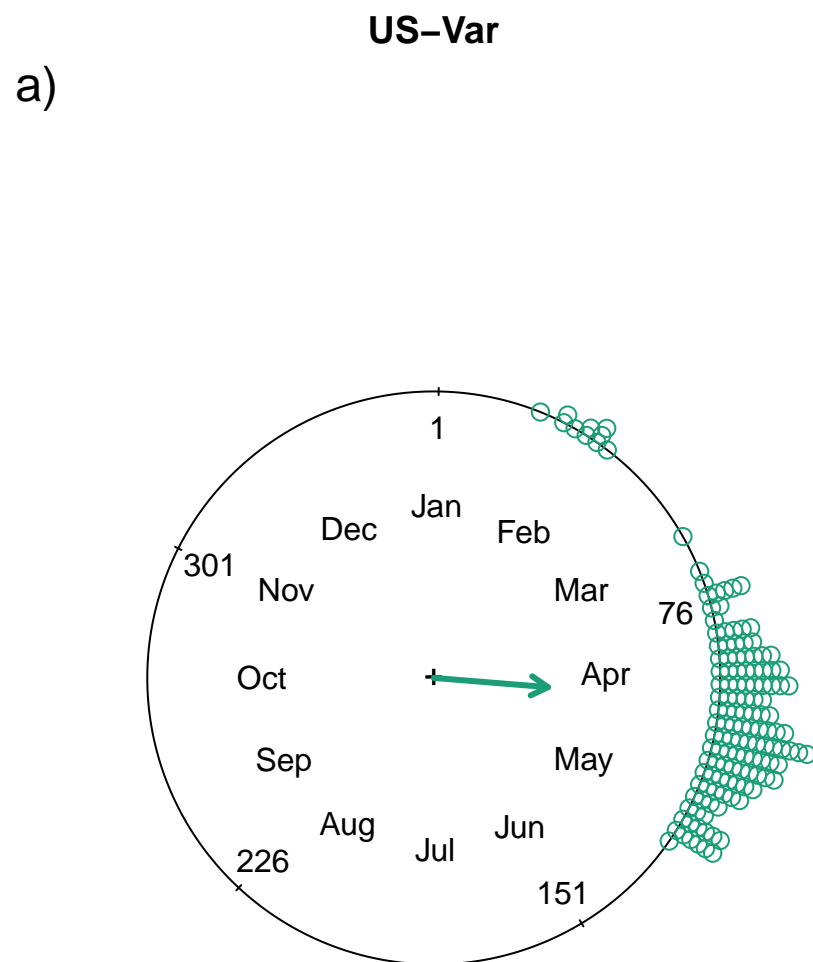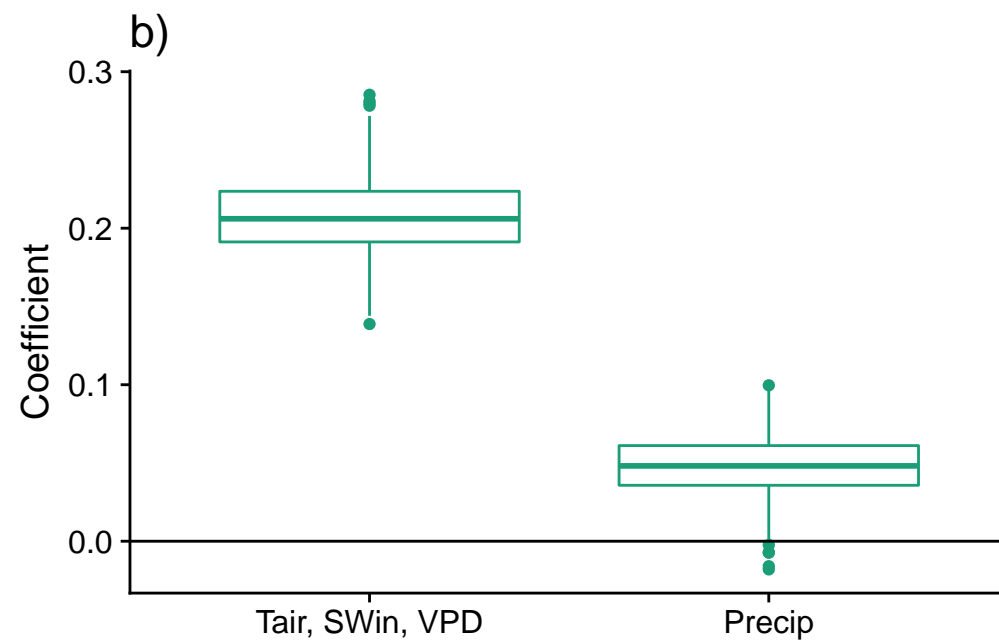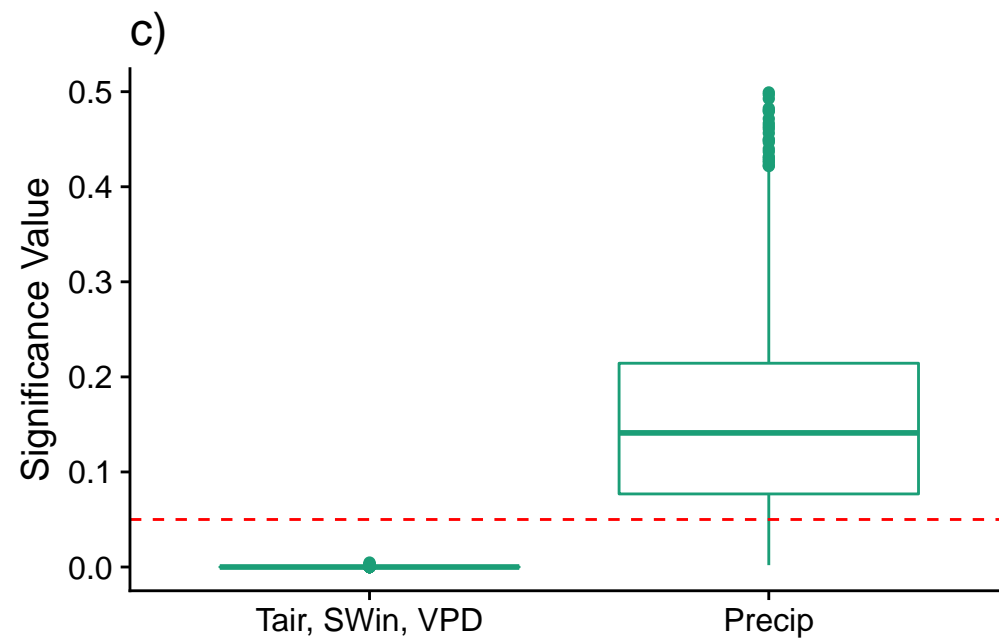

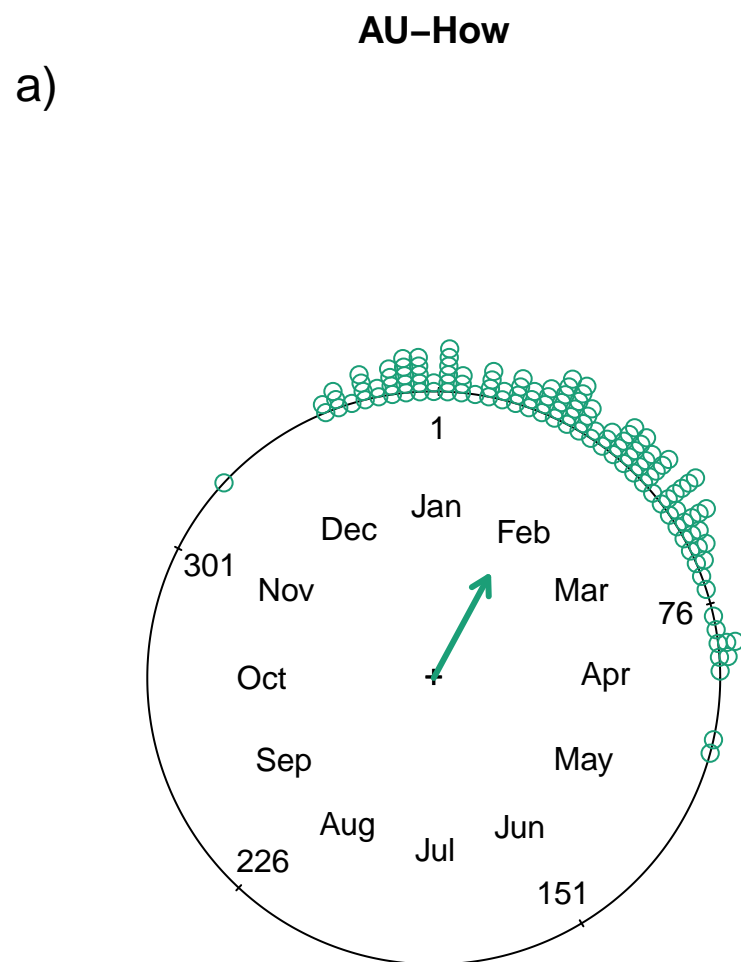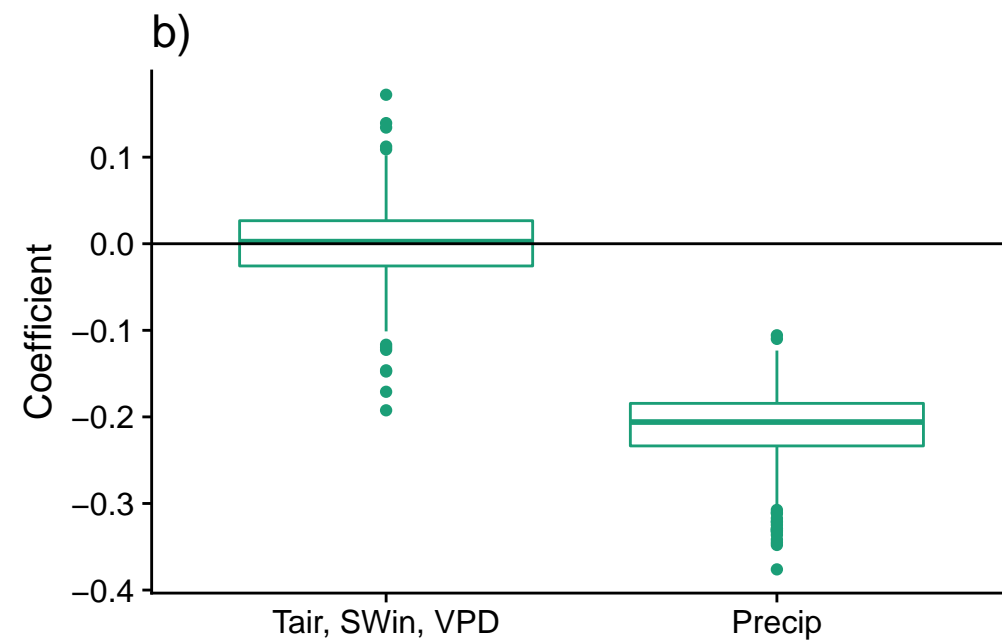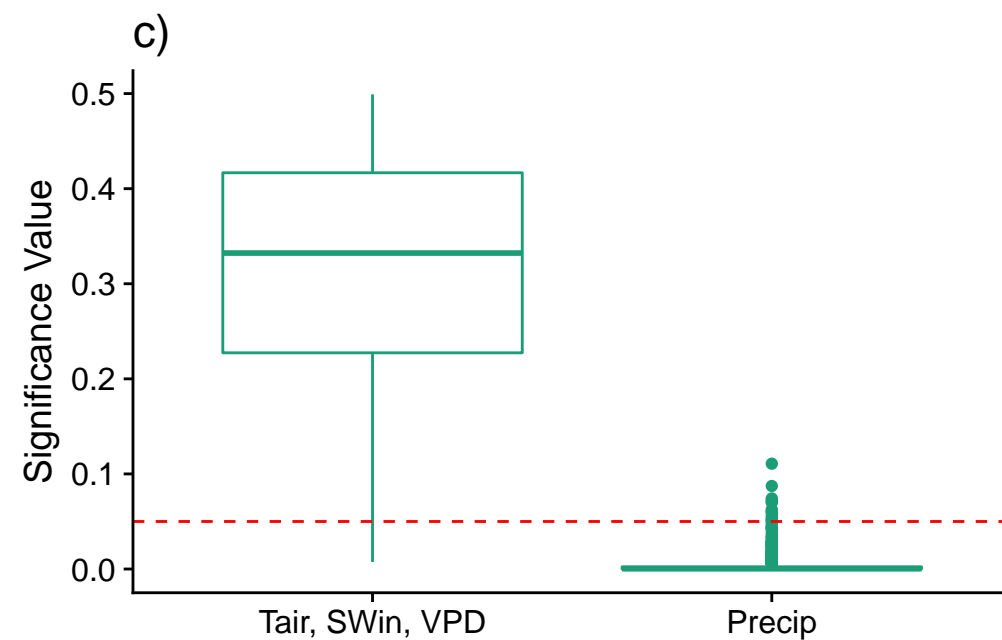

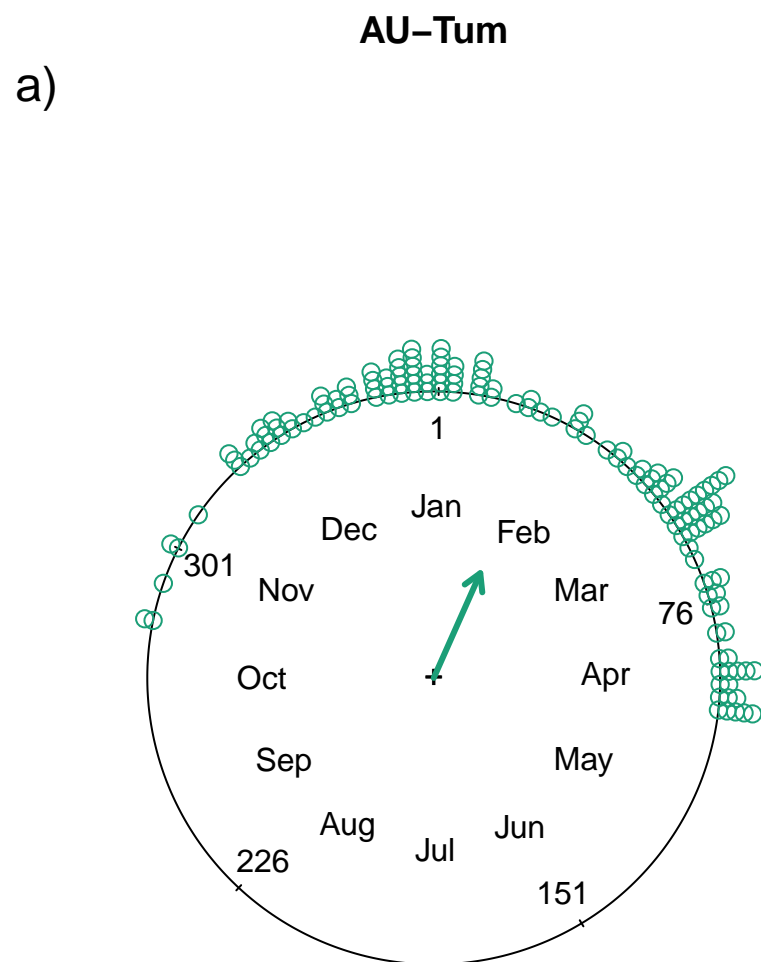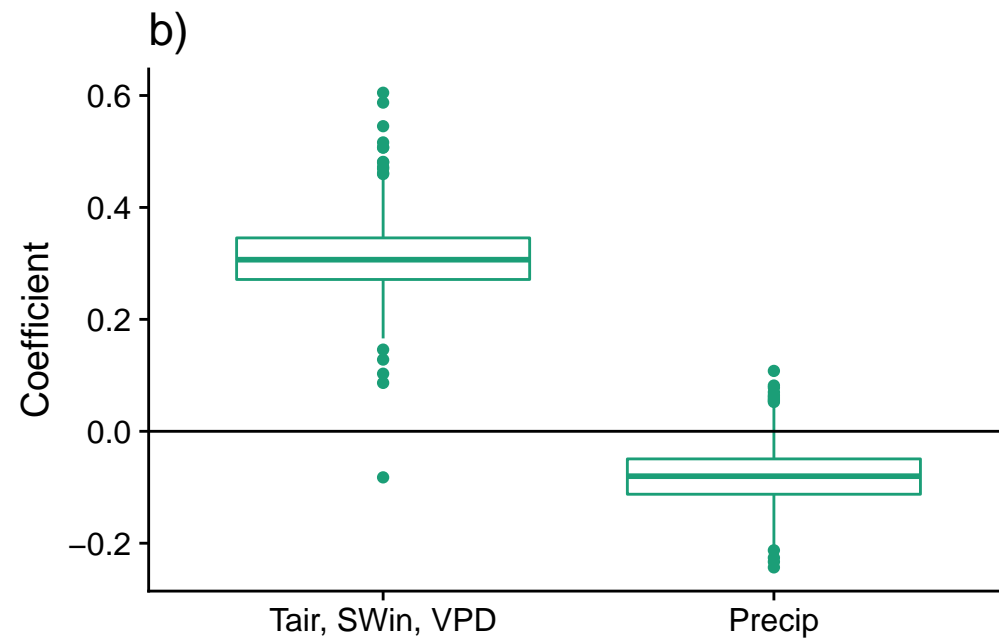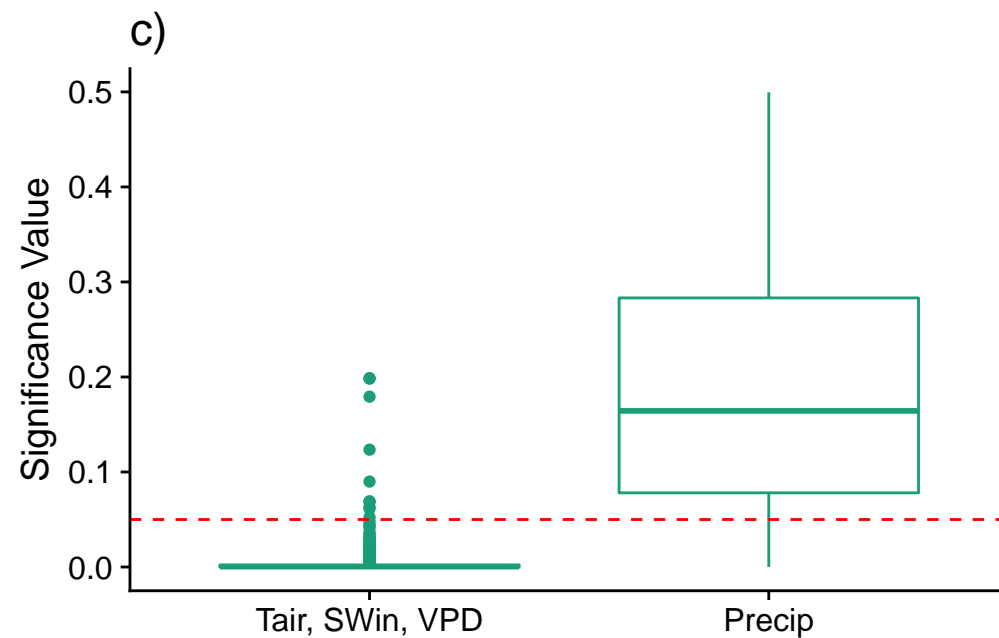



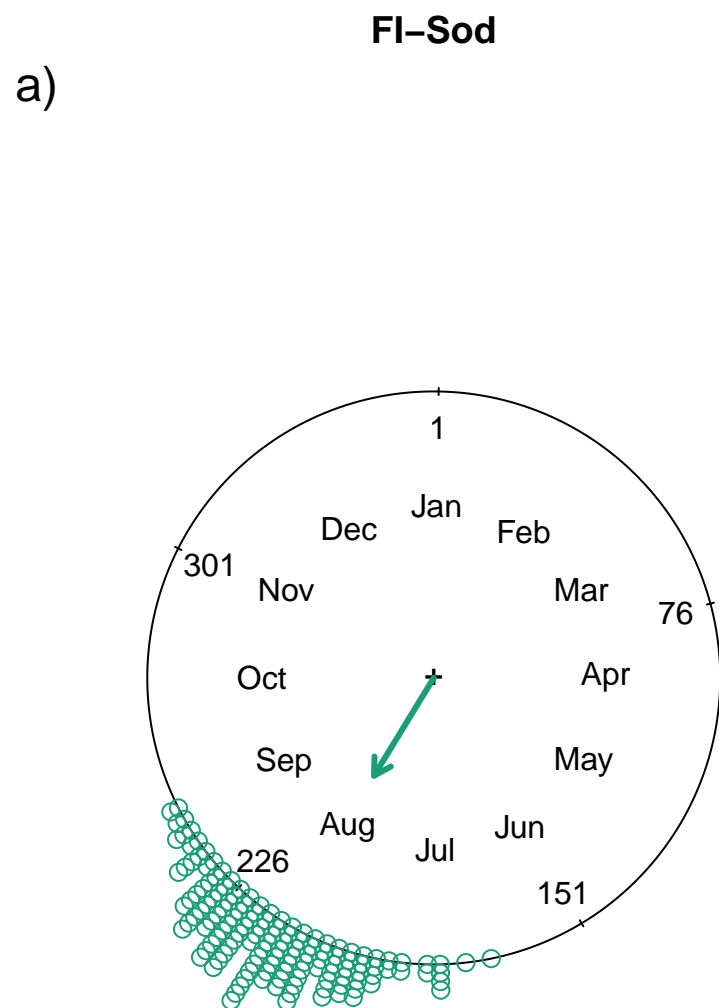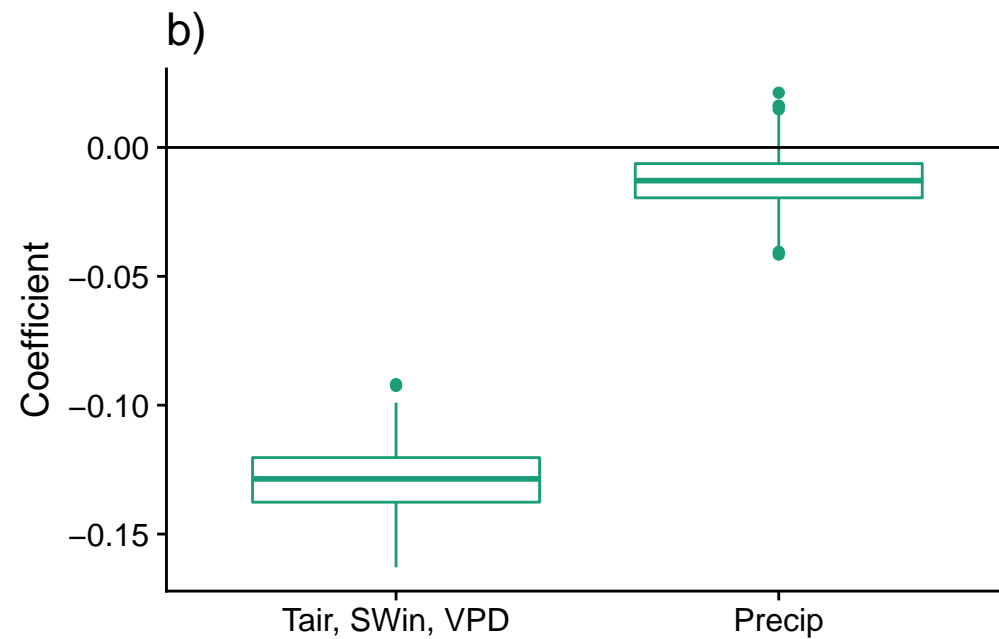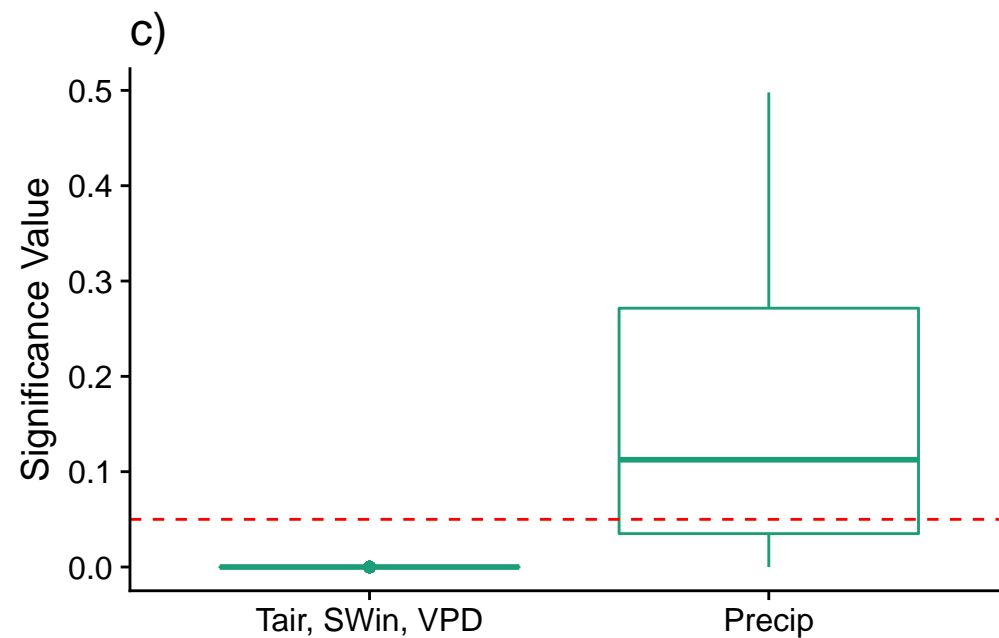

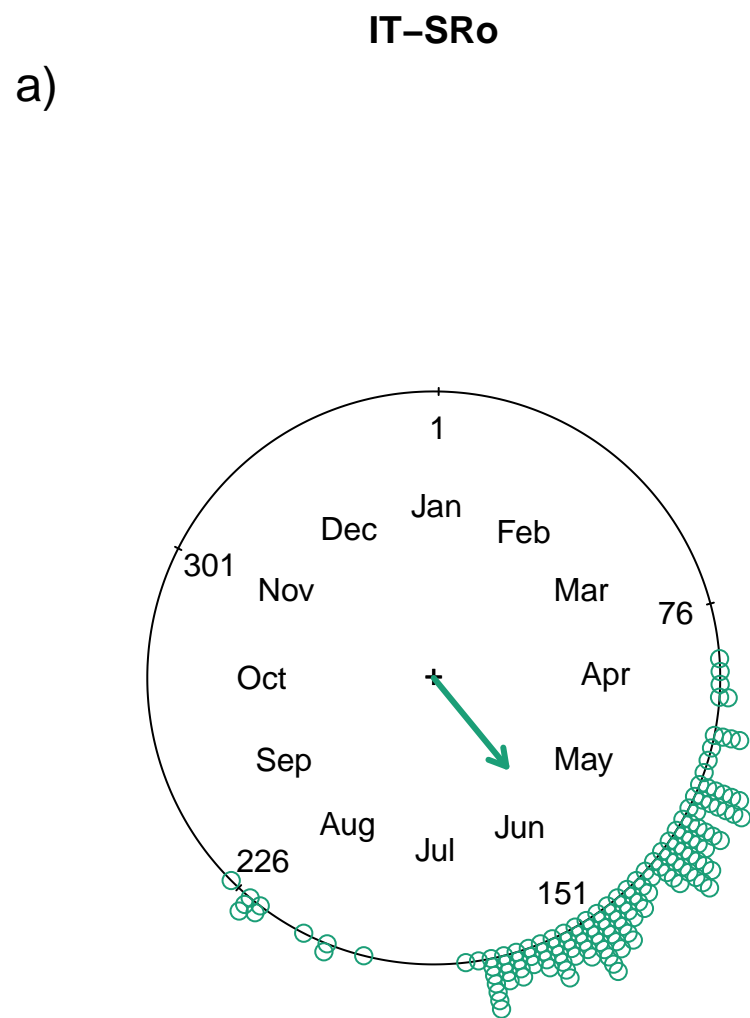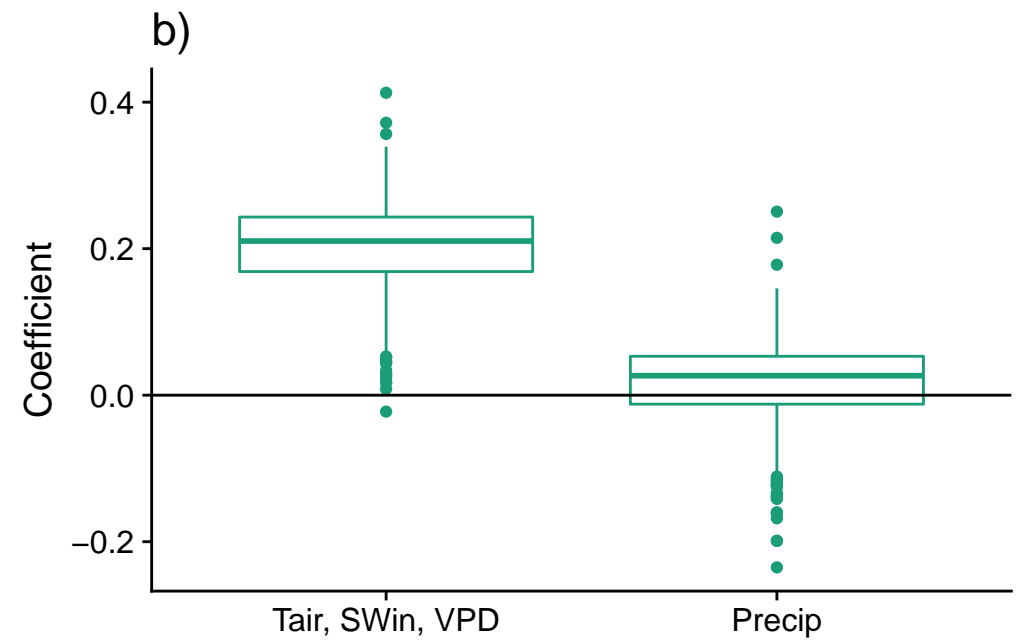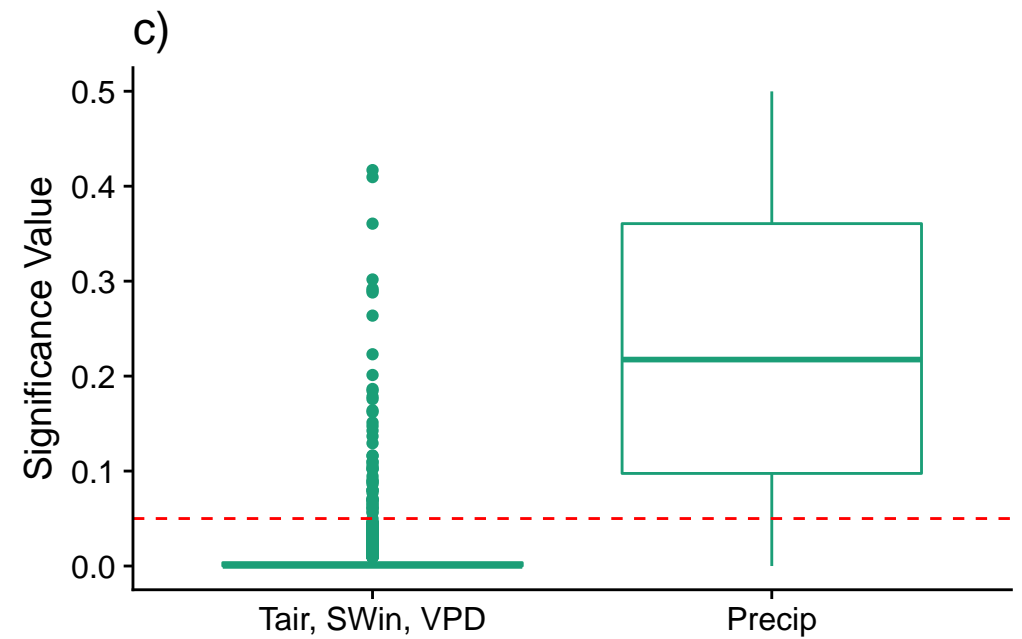

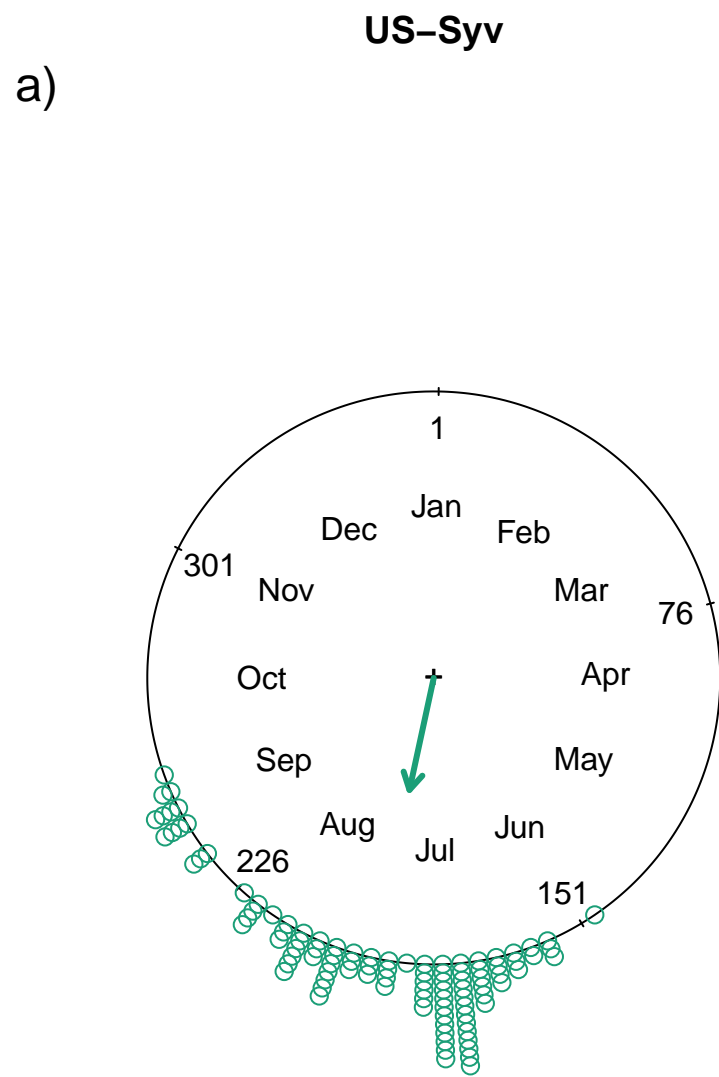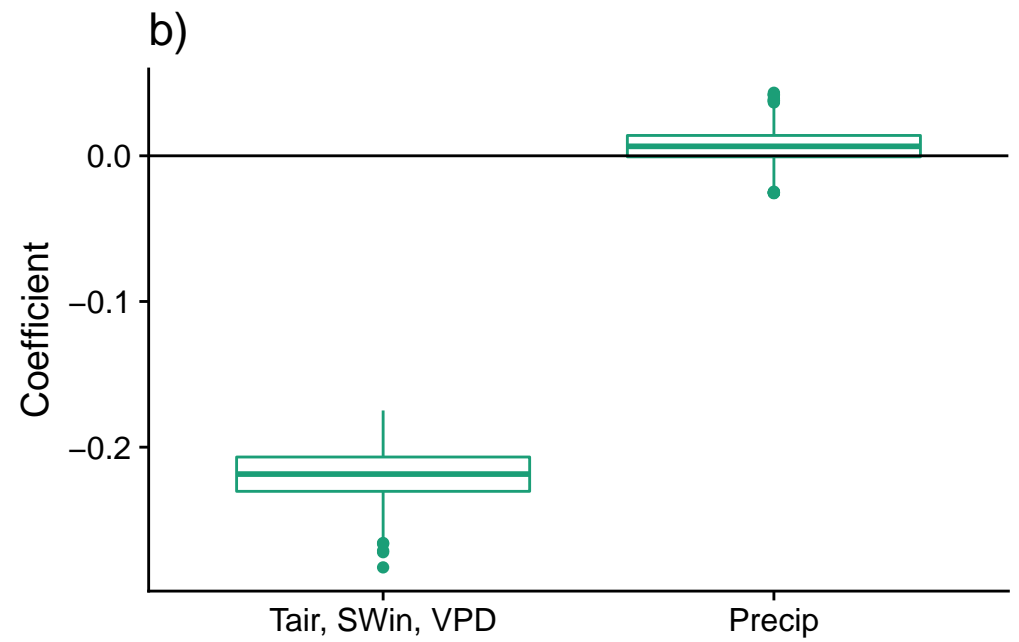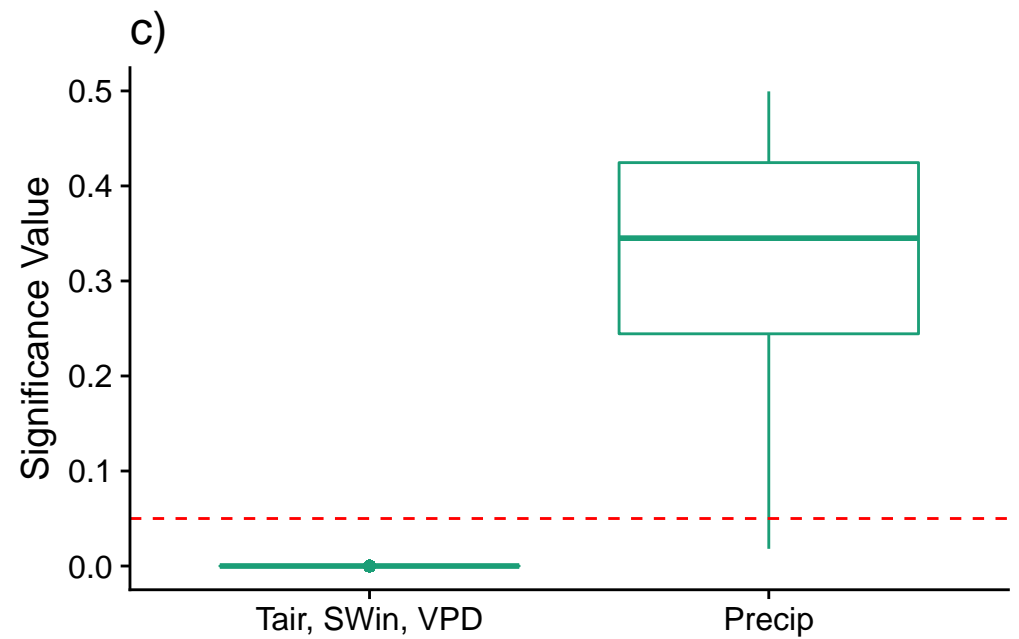

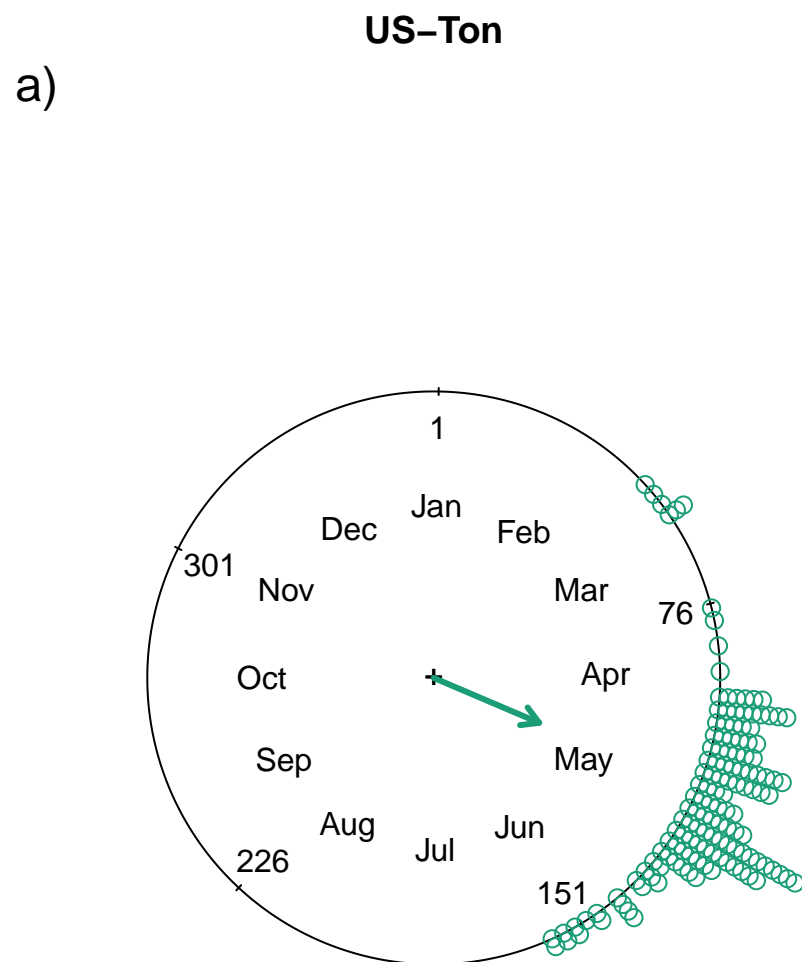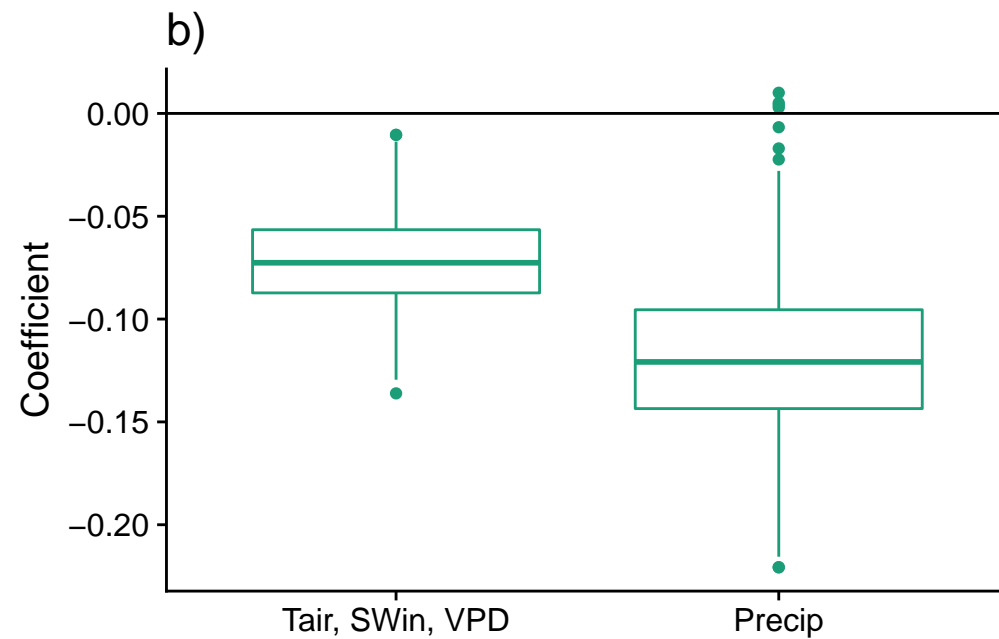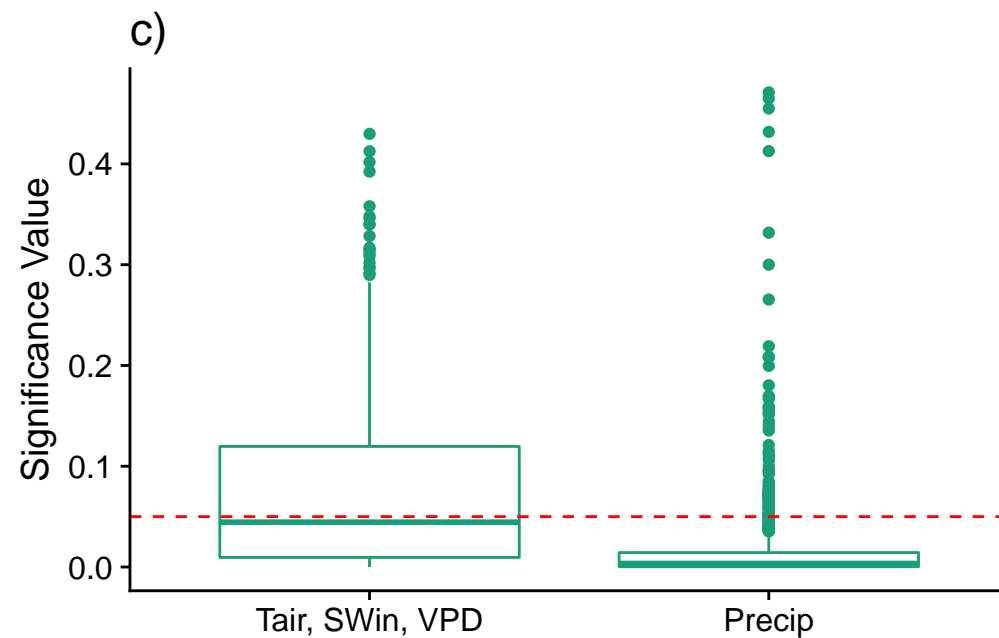

a)

ZA-Kru

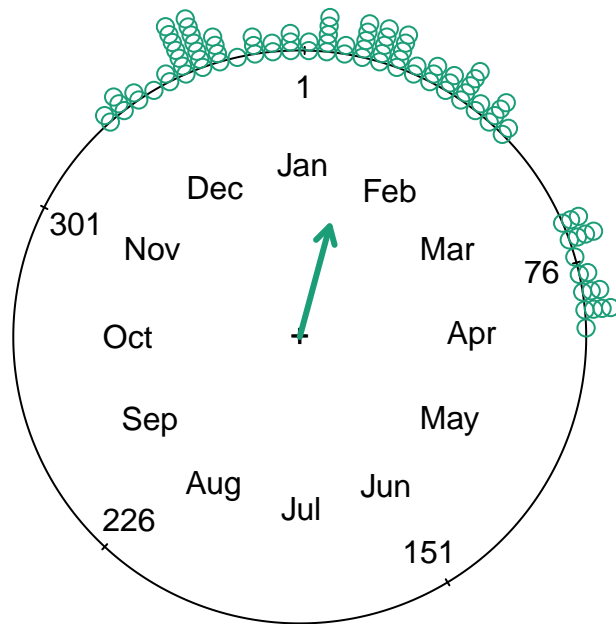

b)

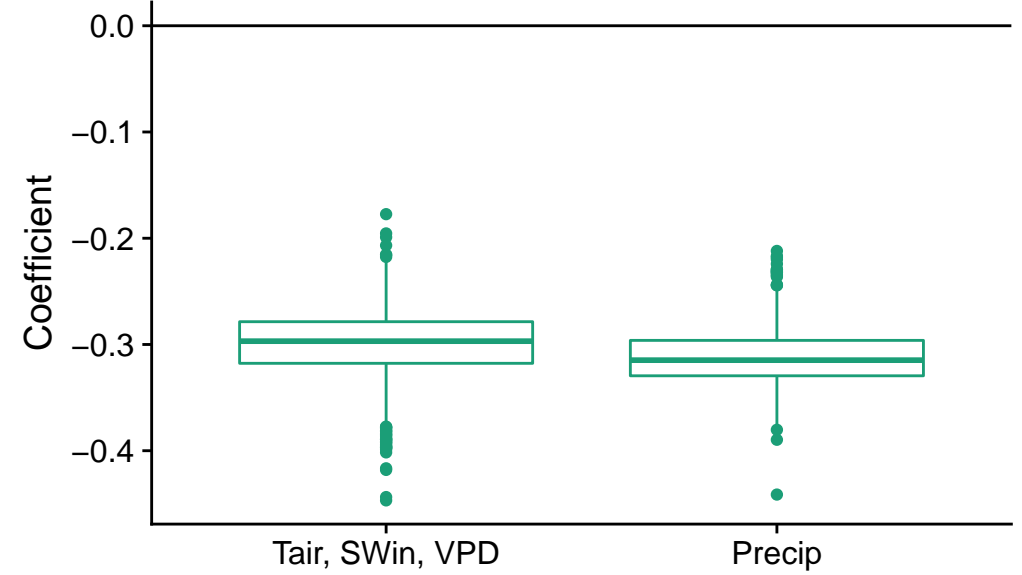

c)

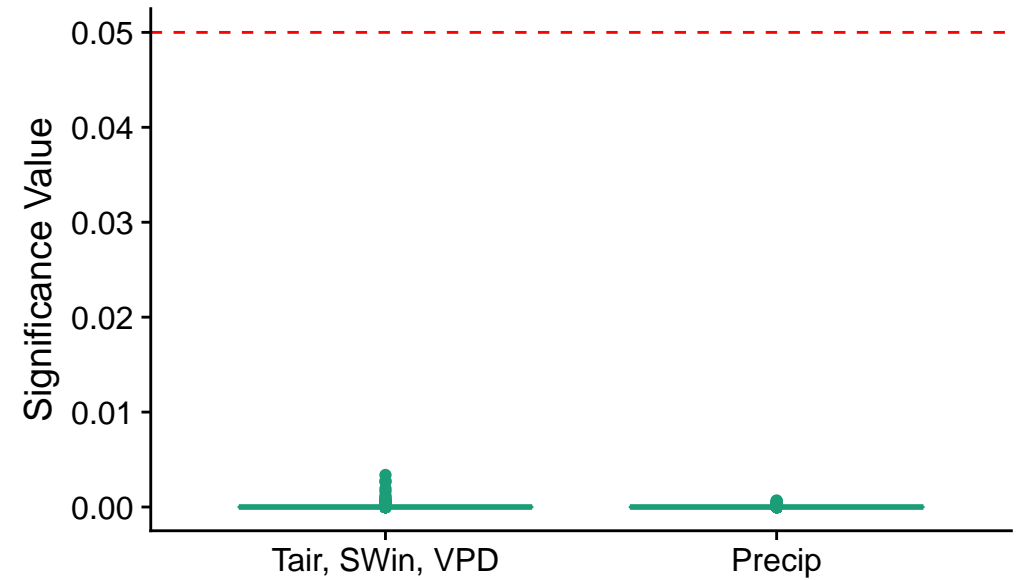

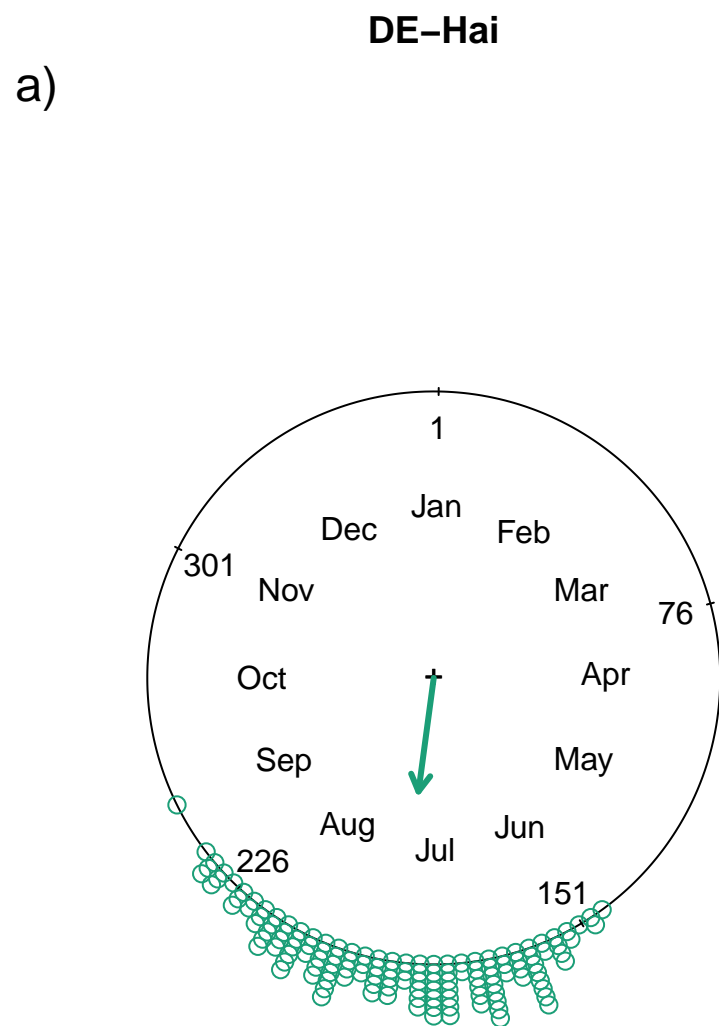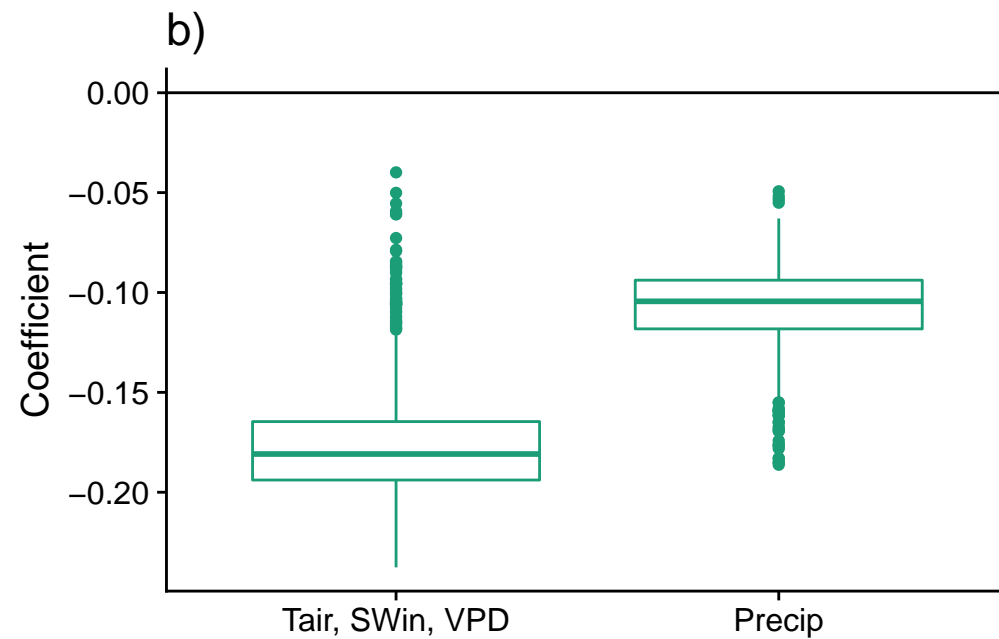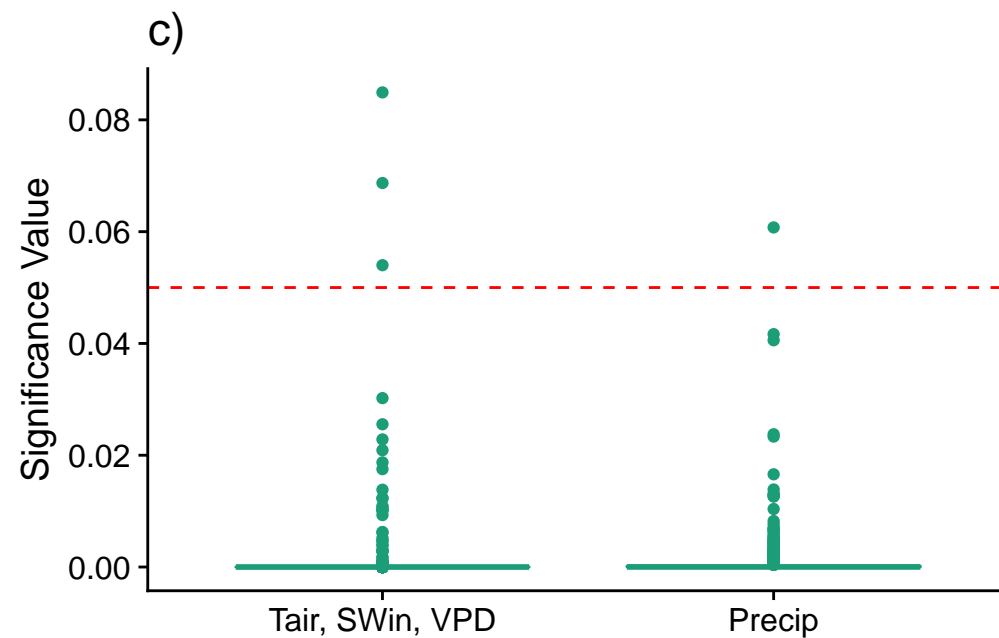

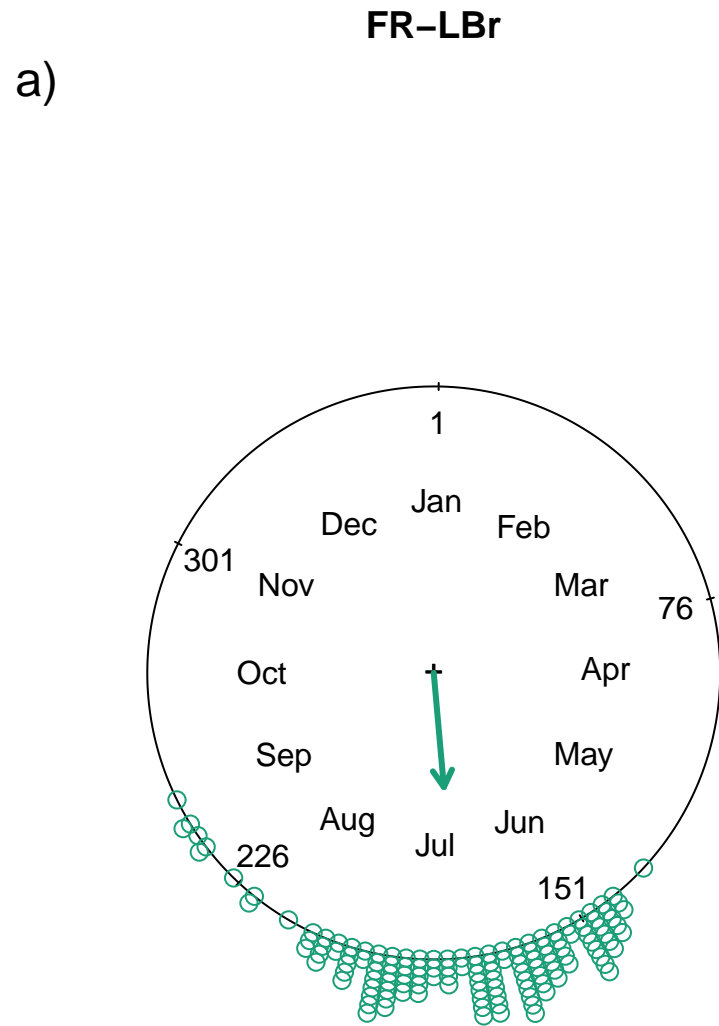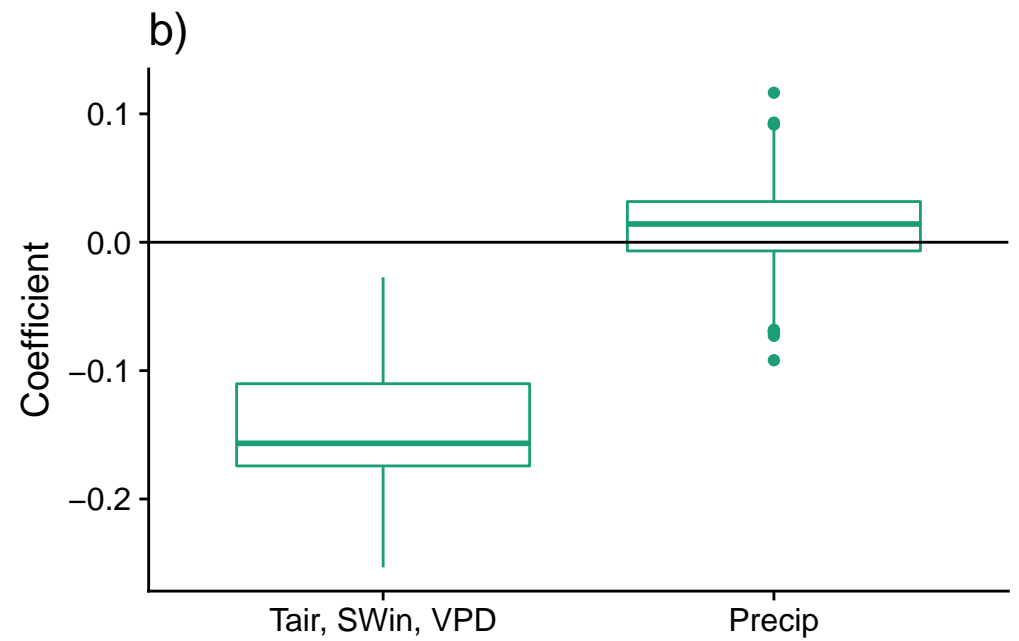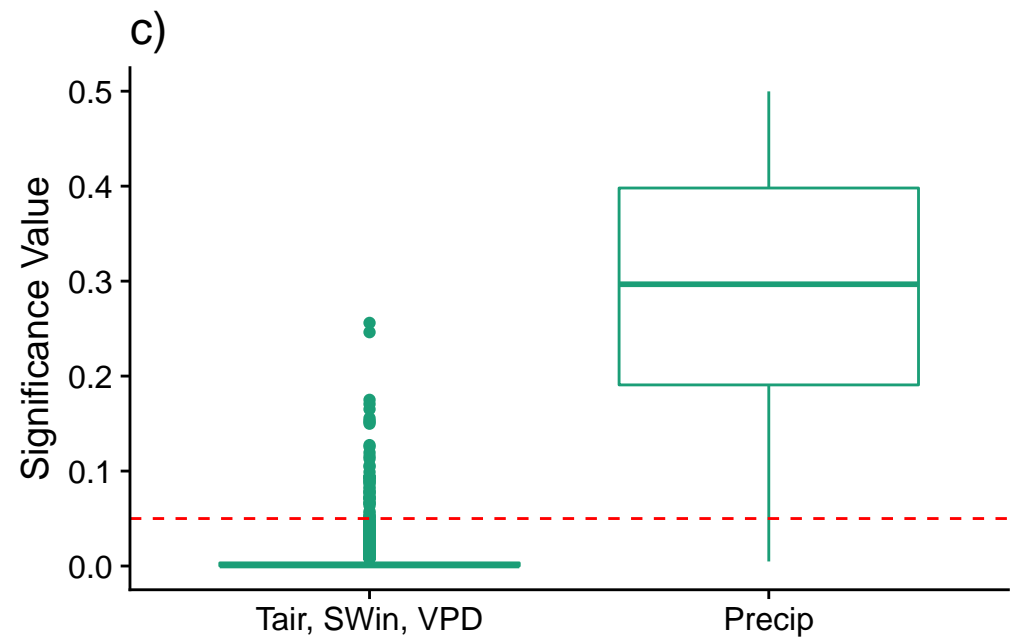

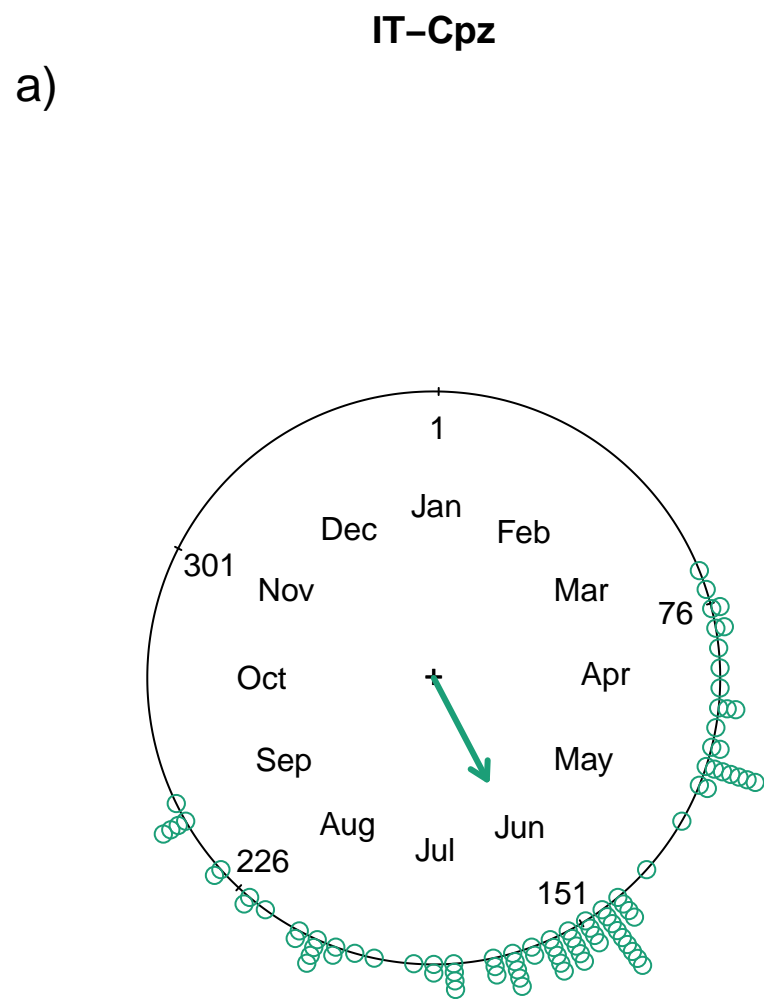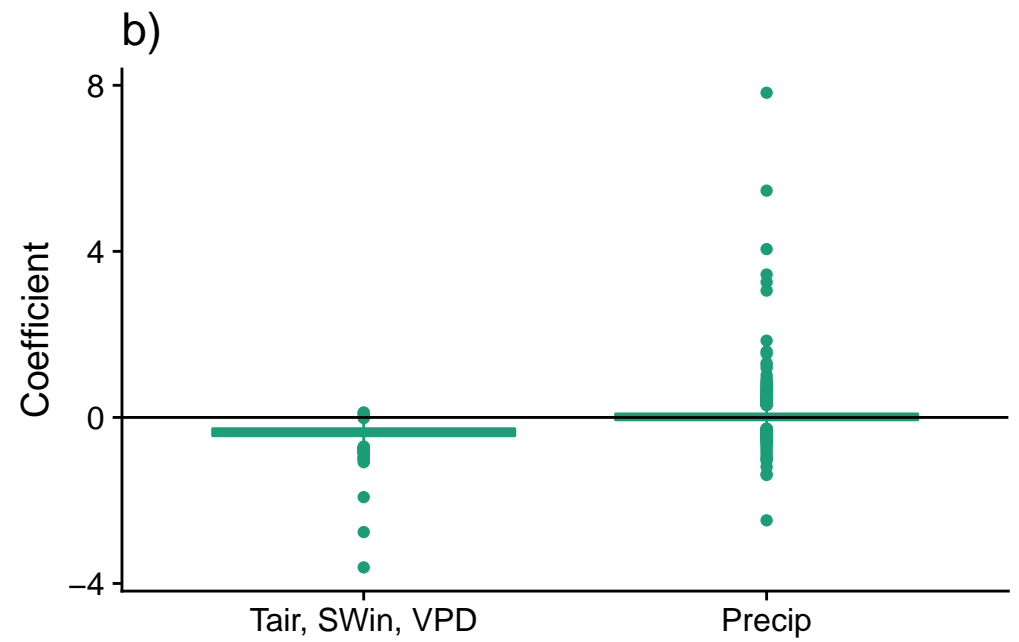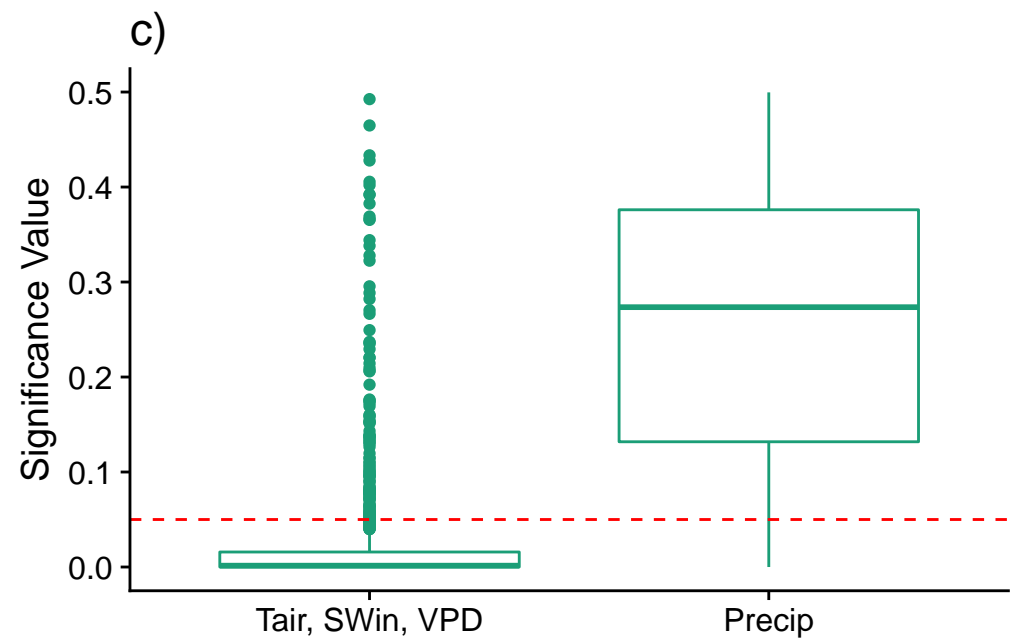



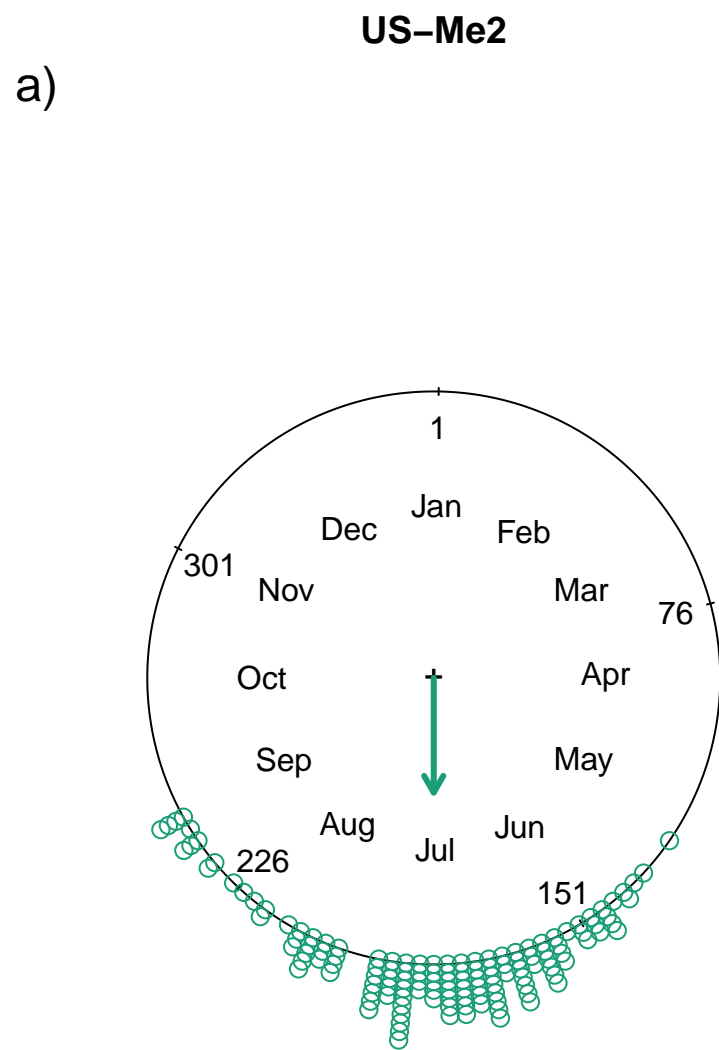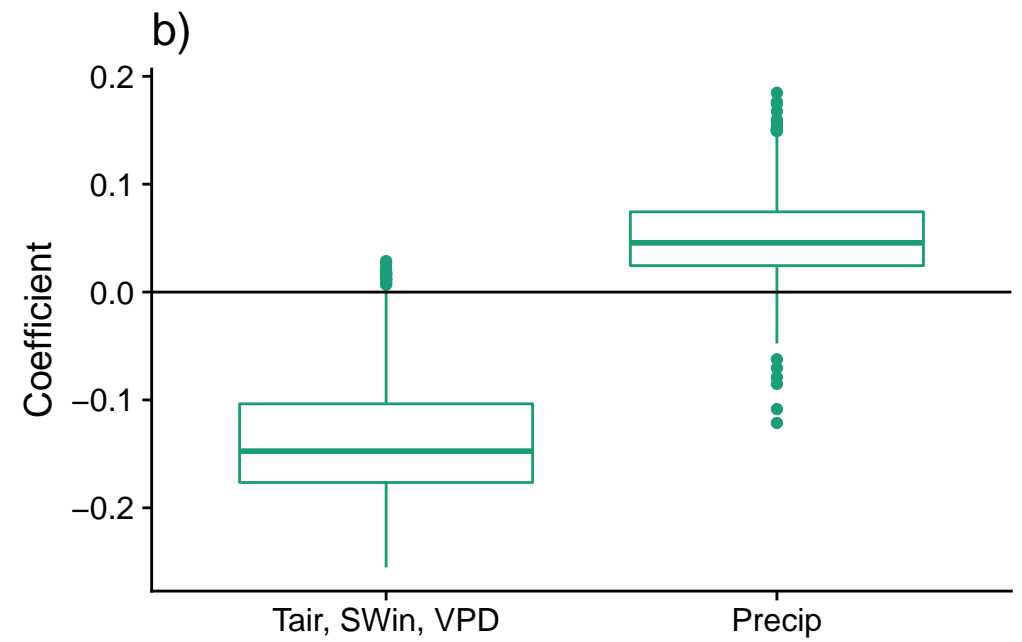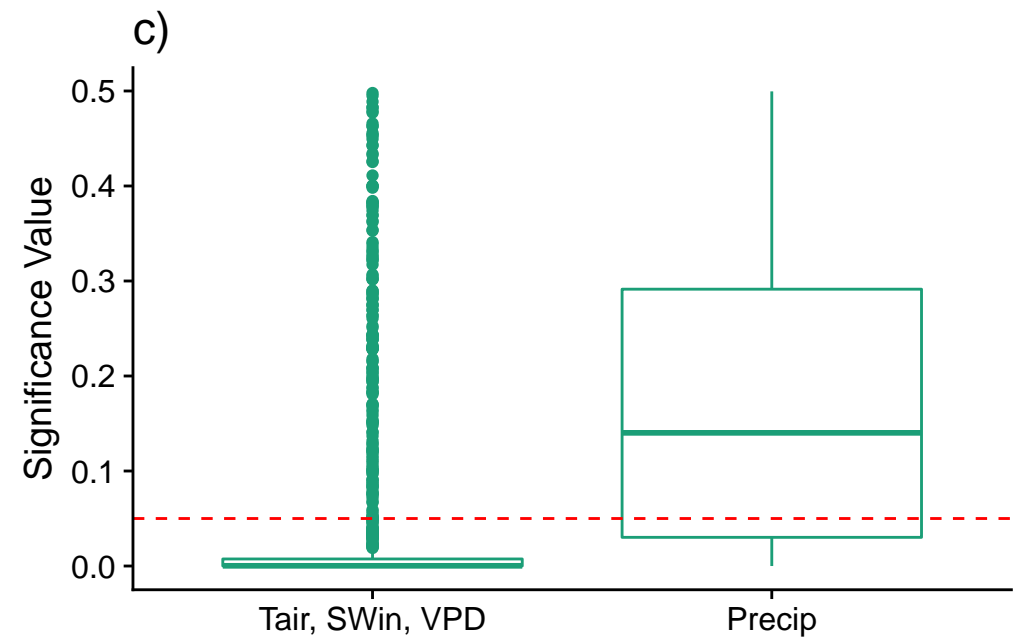

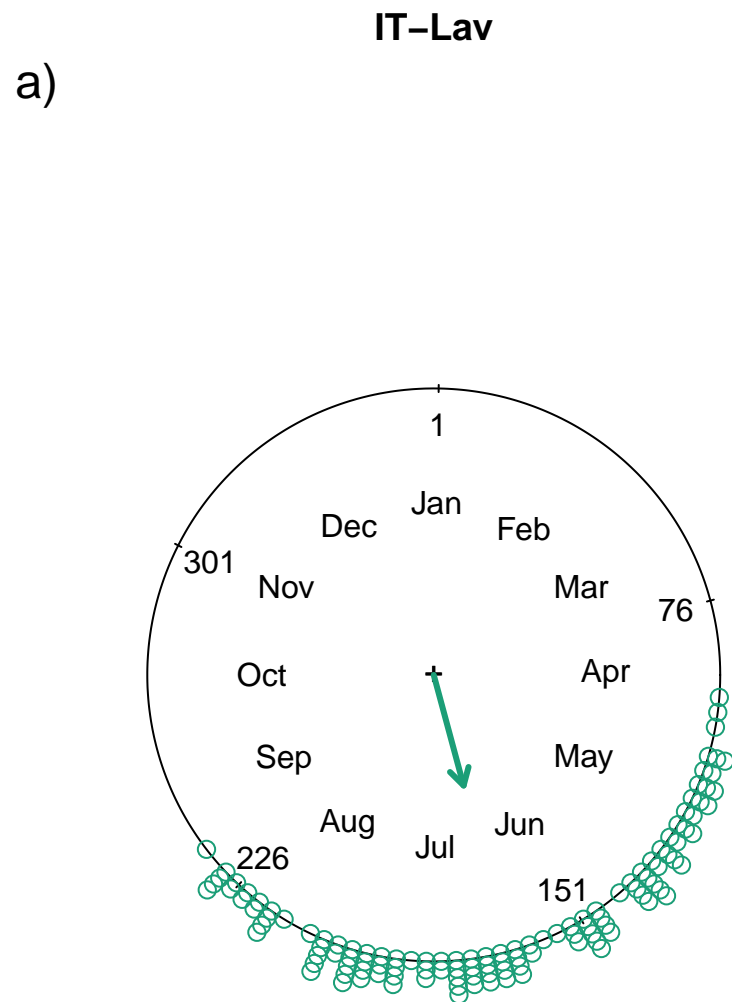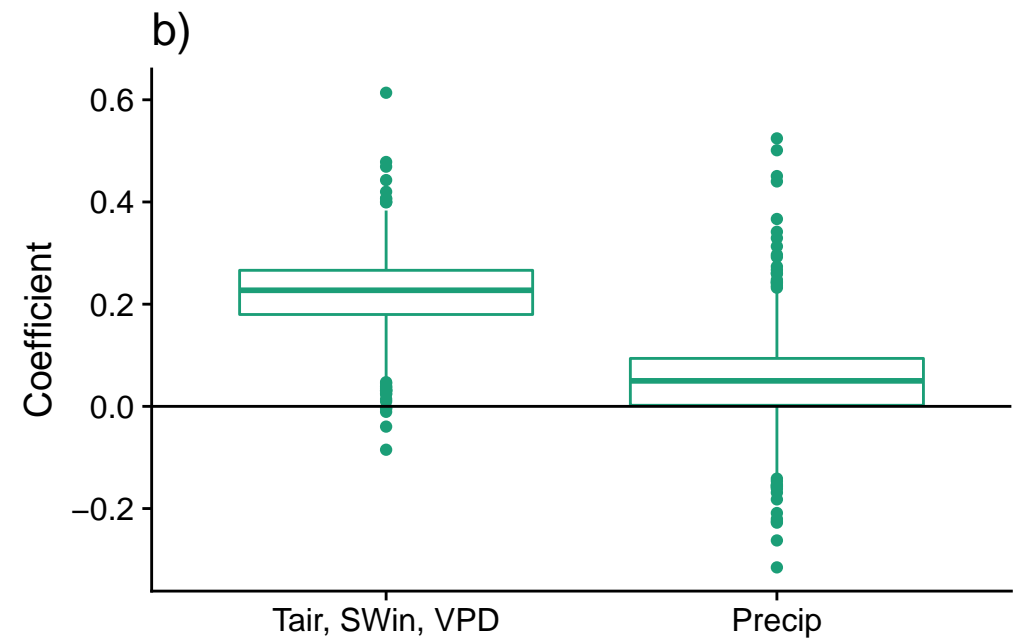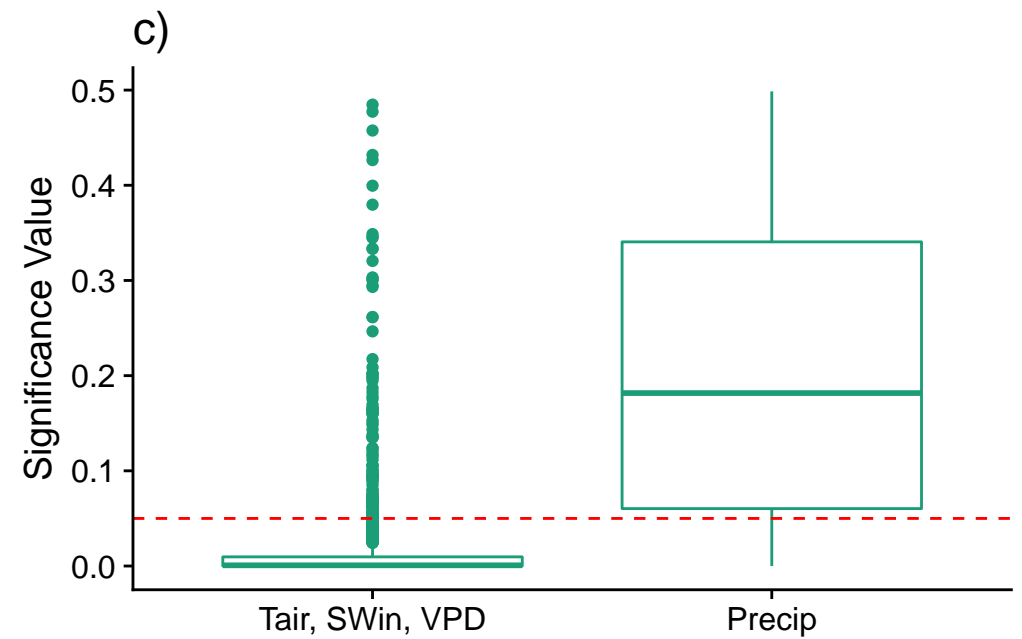

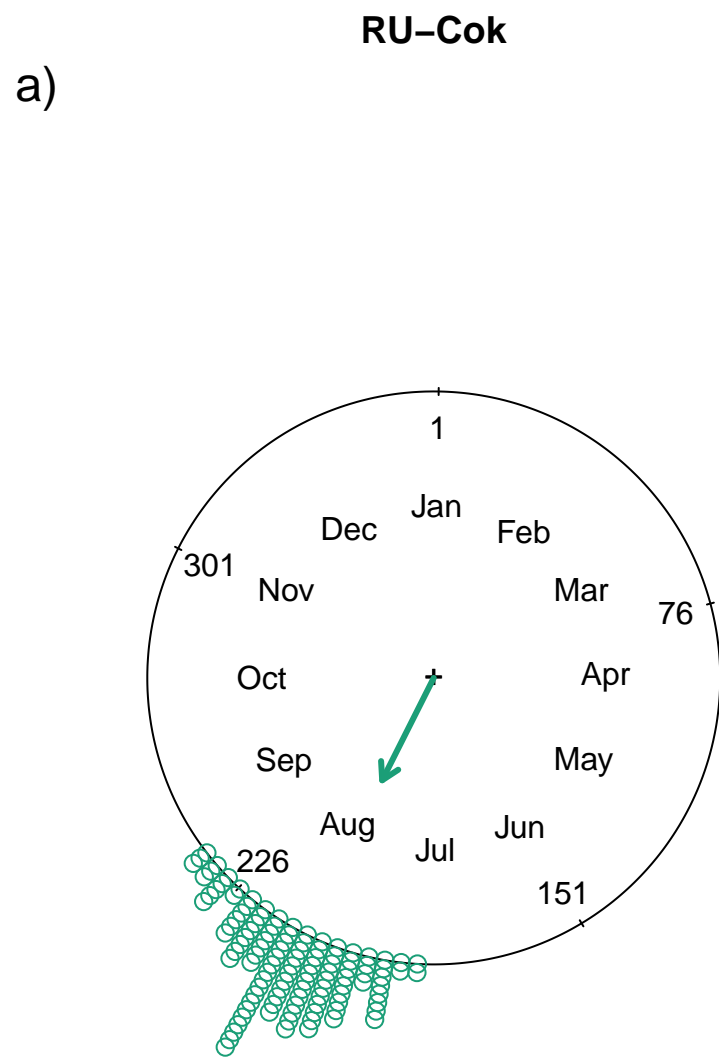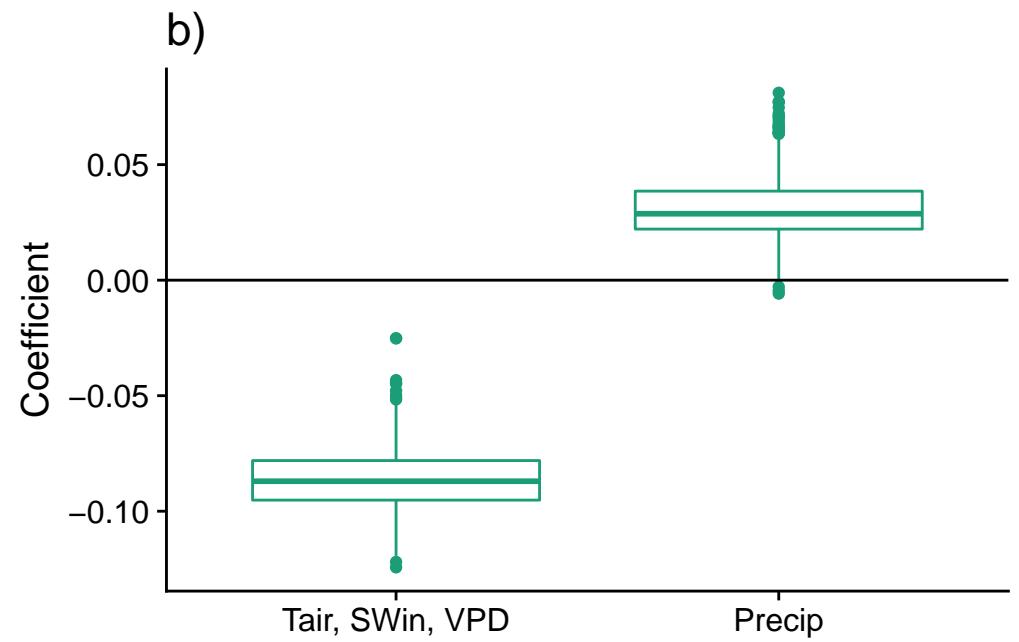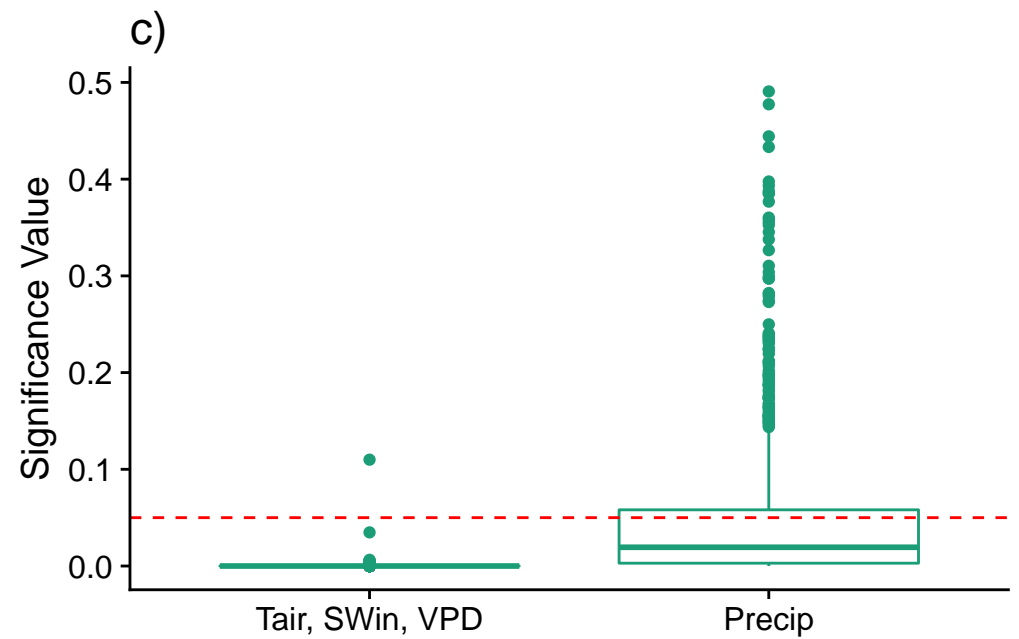

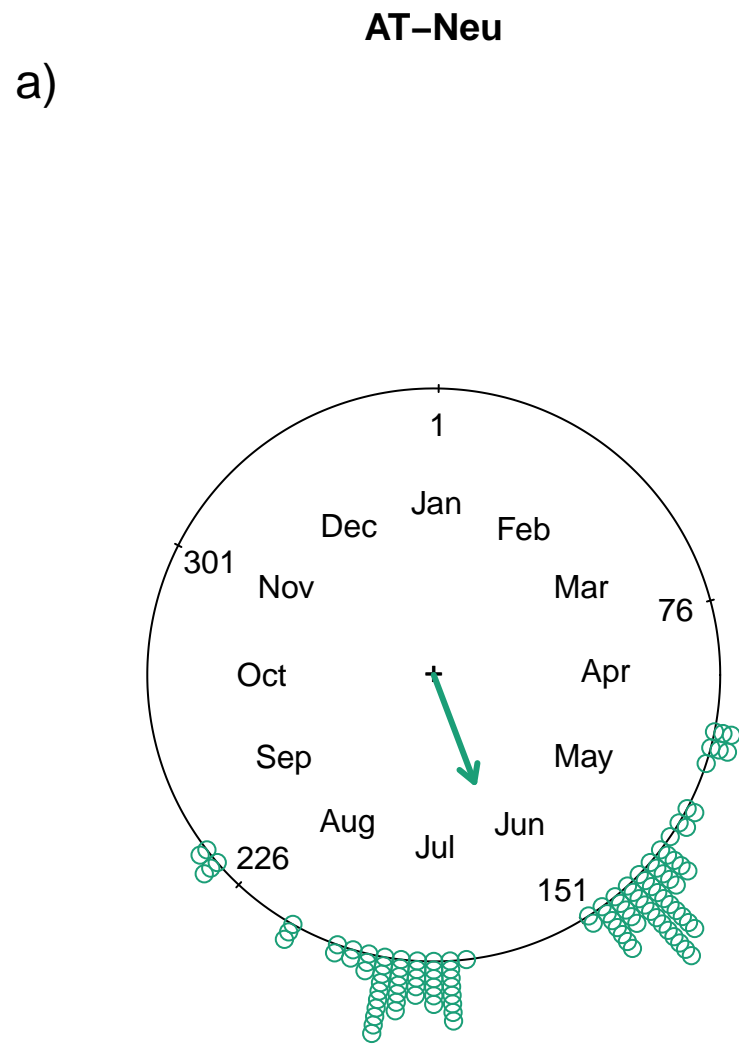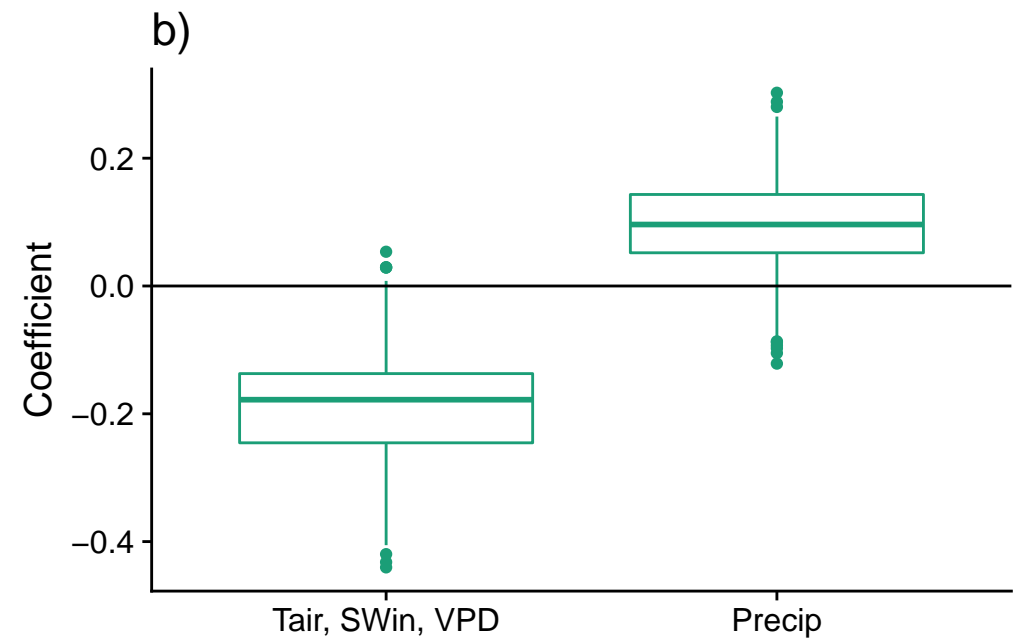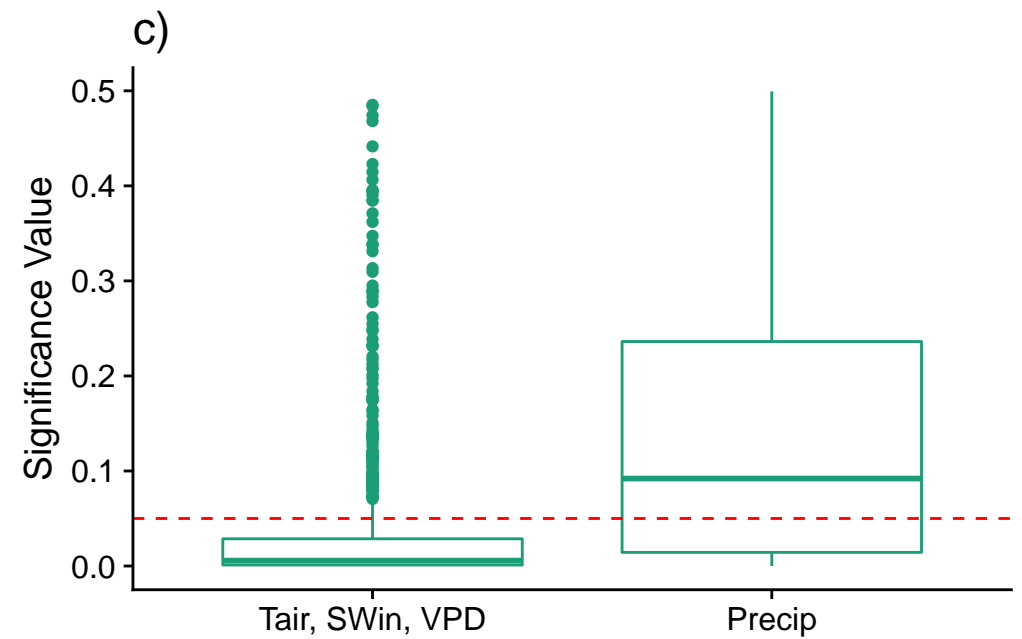

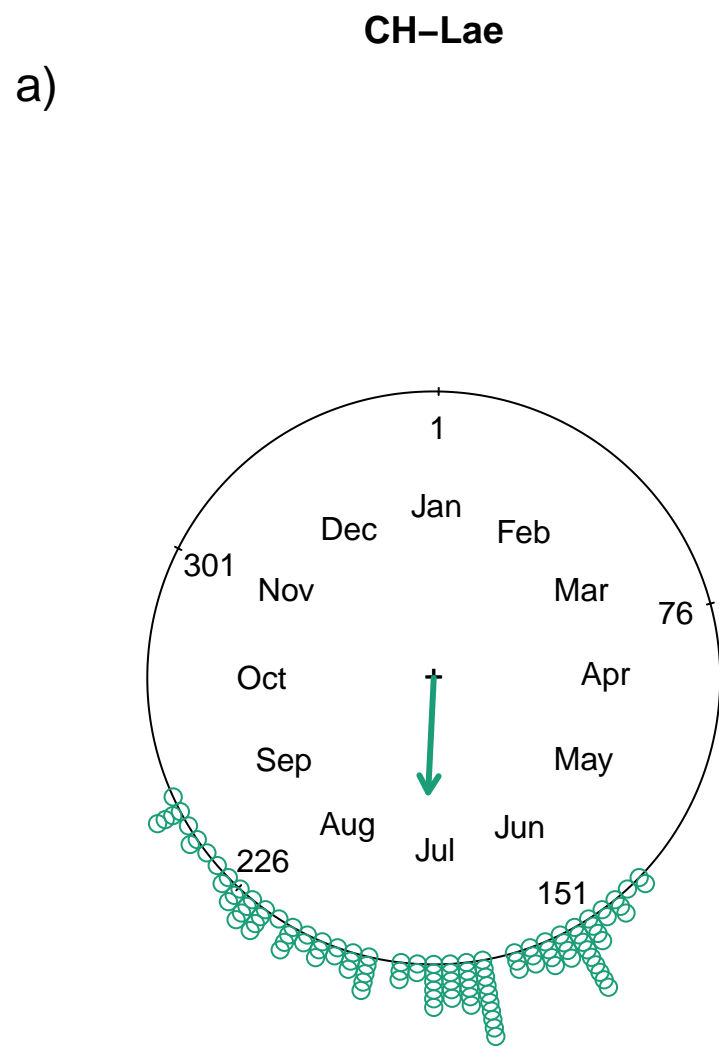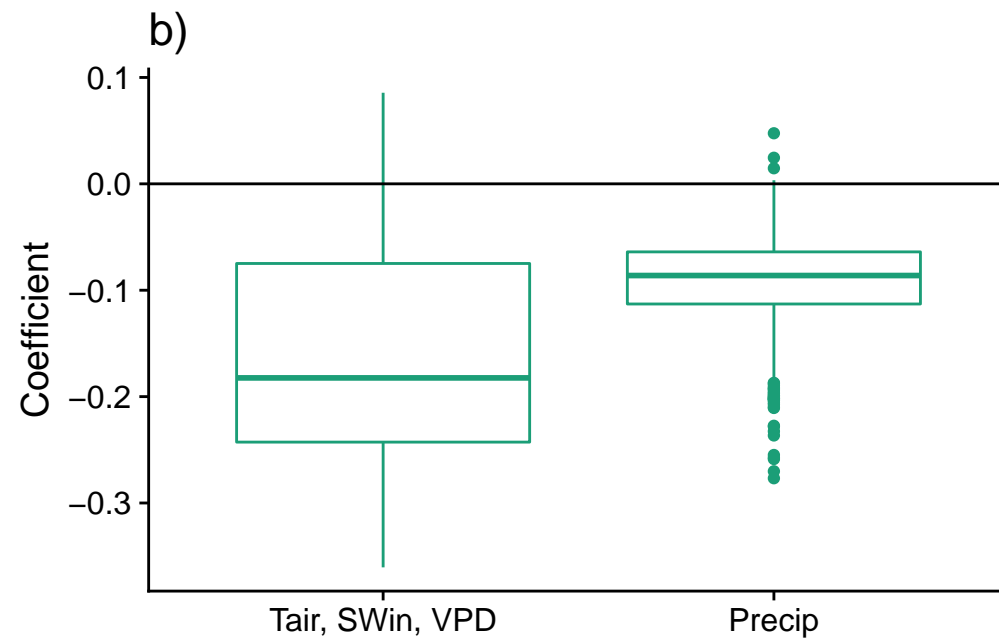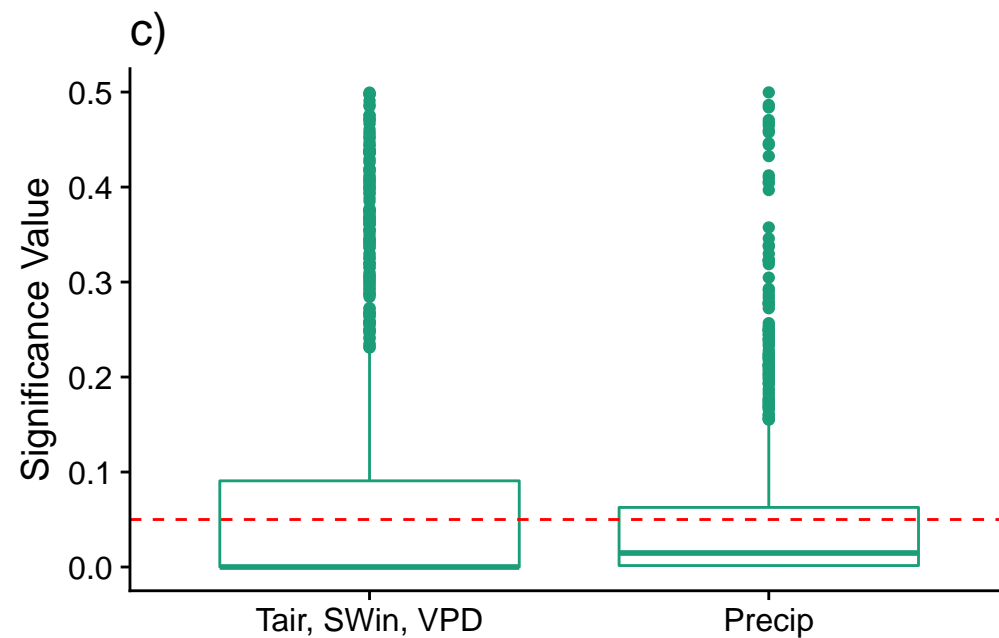

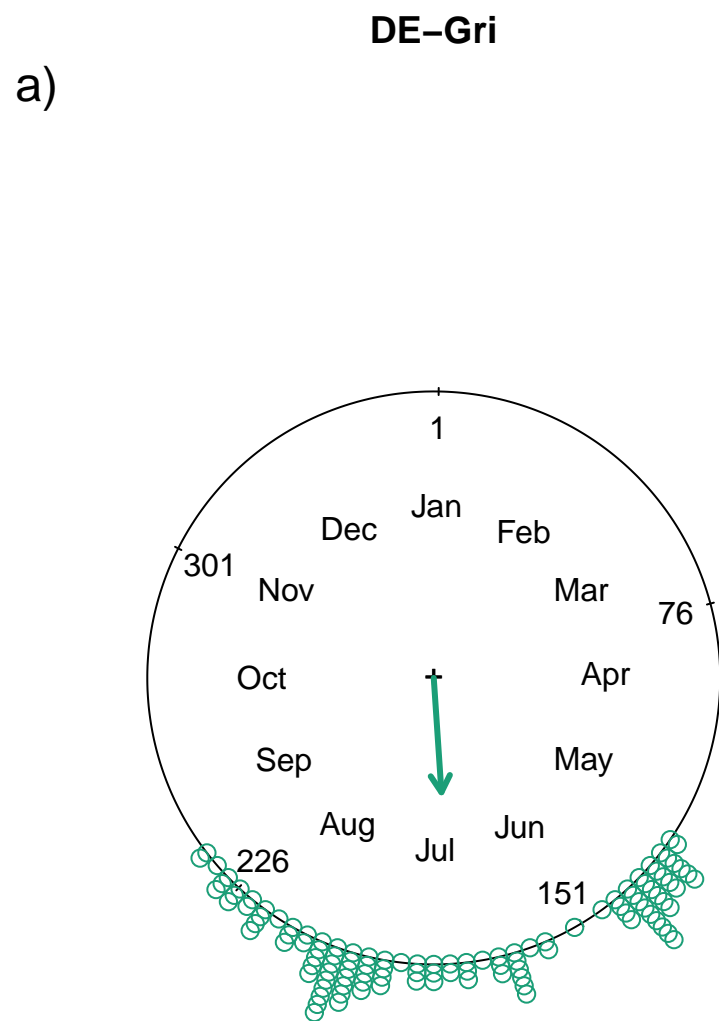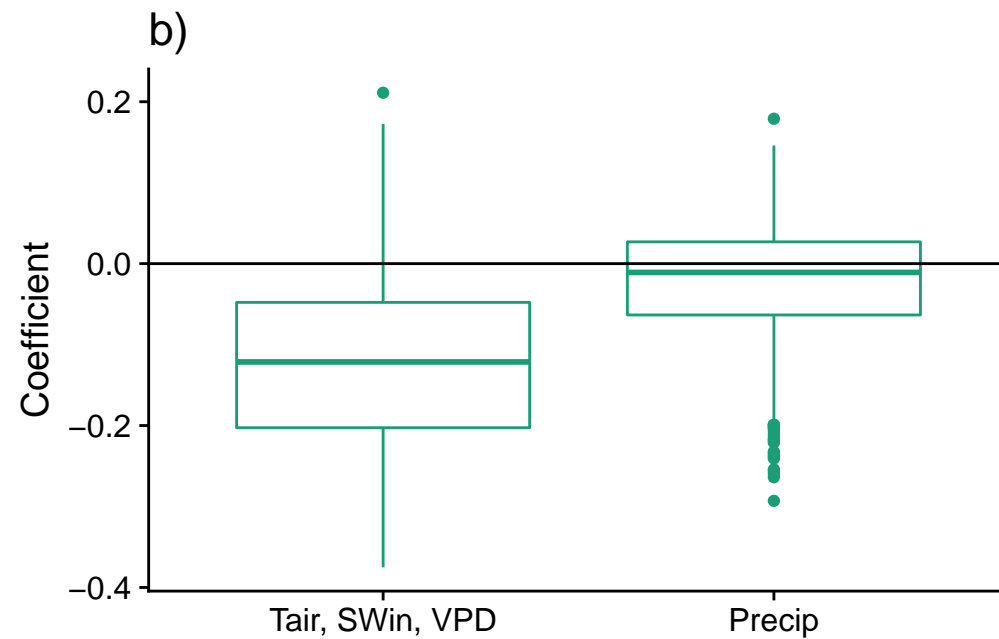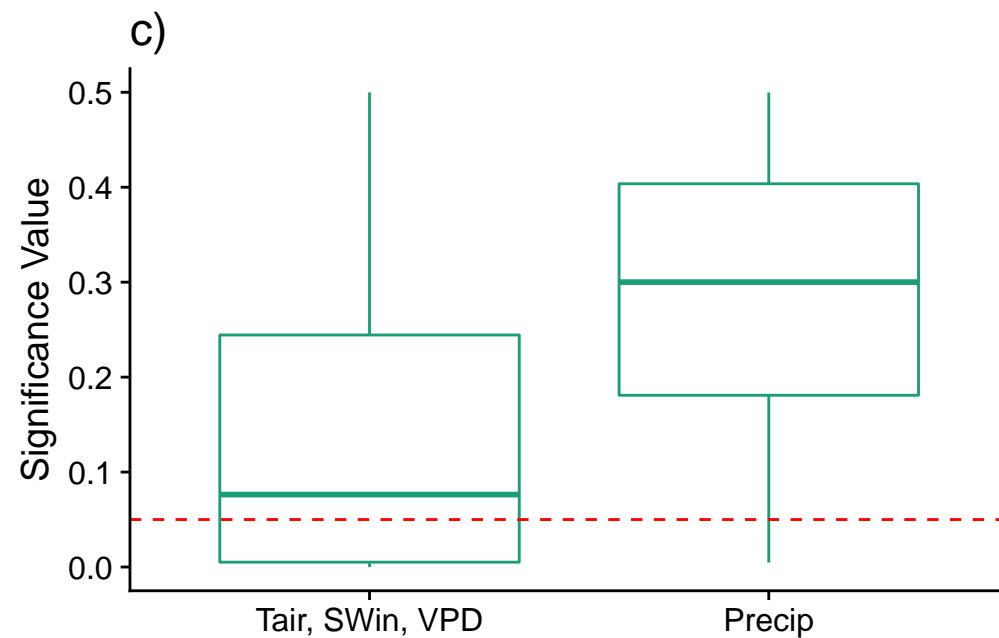

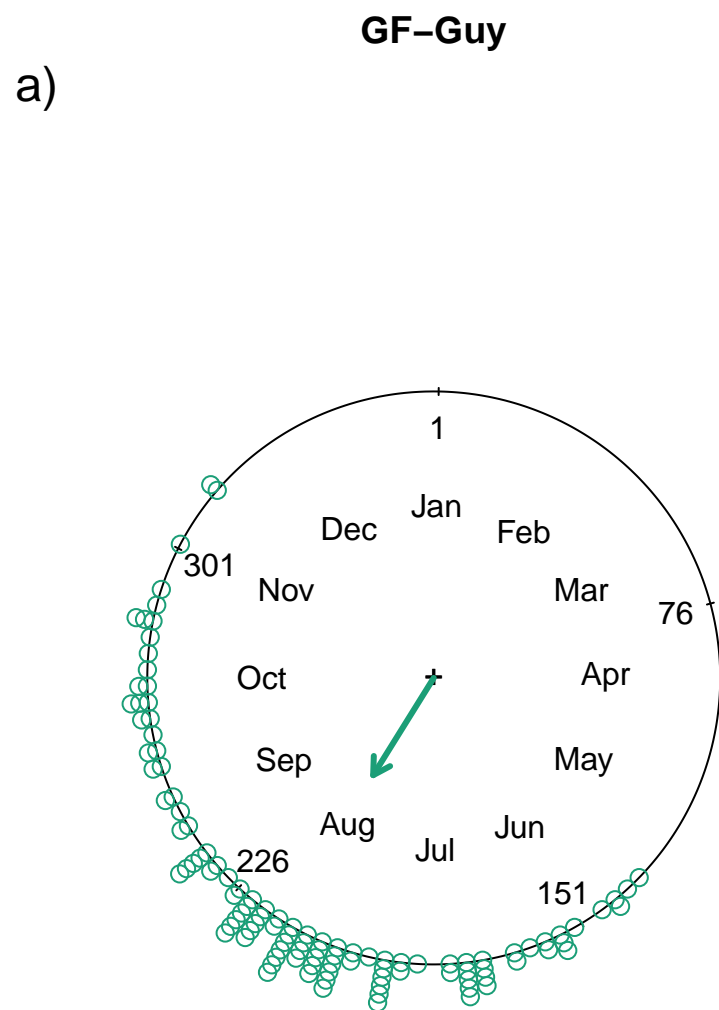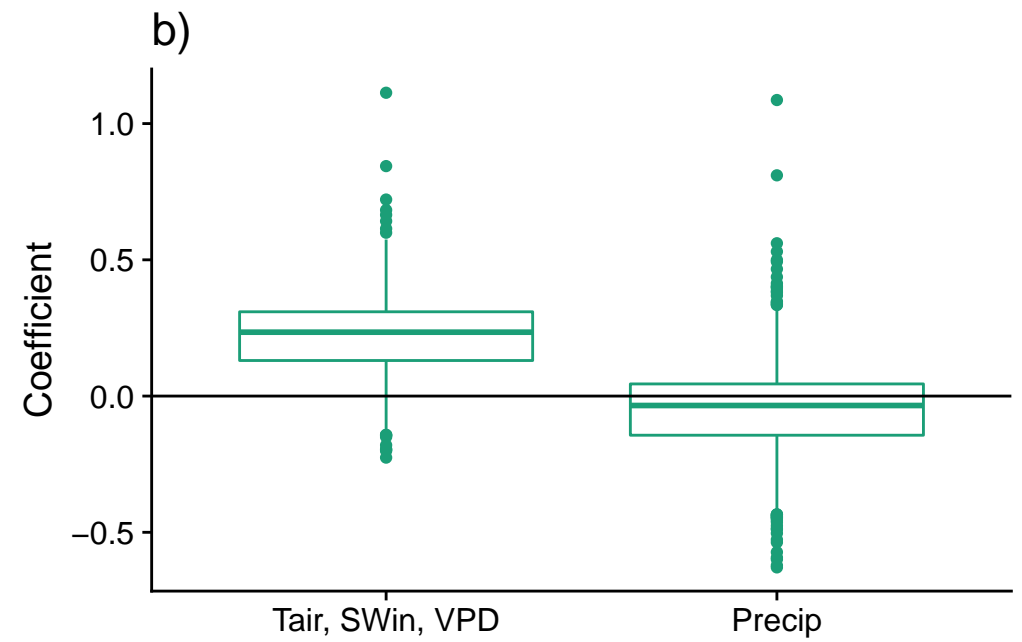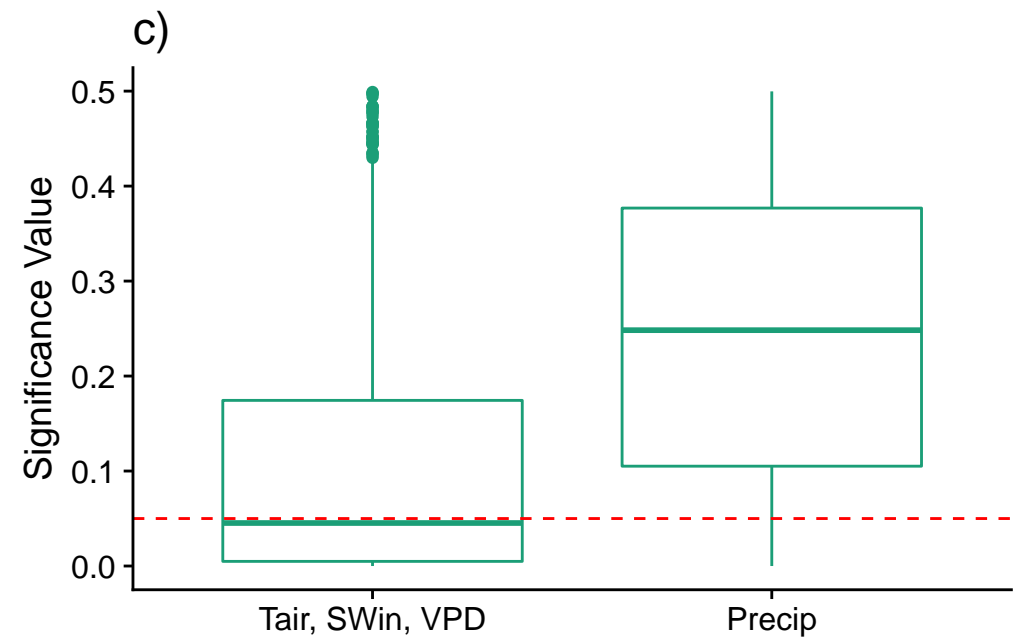

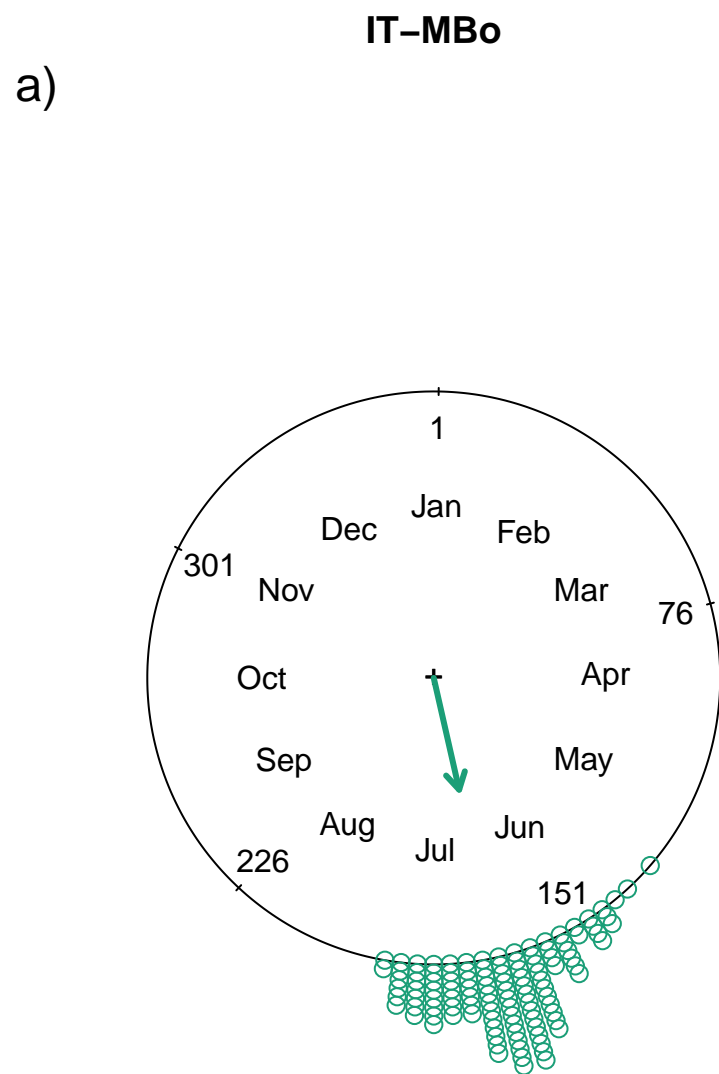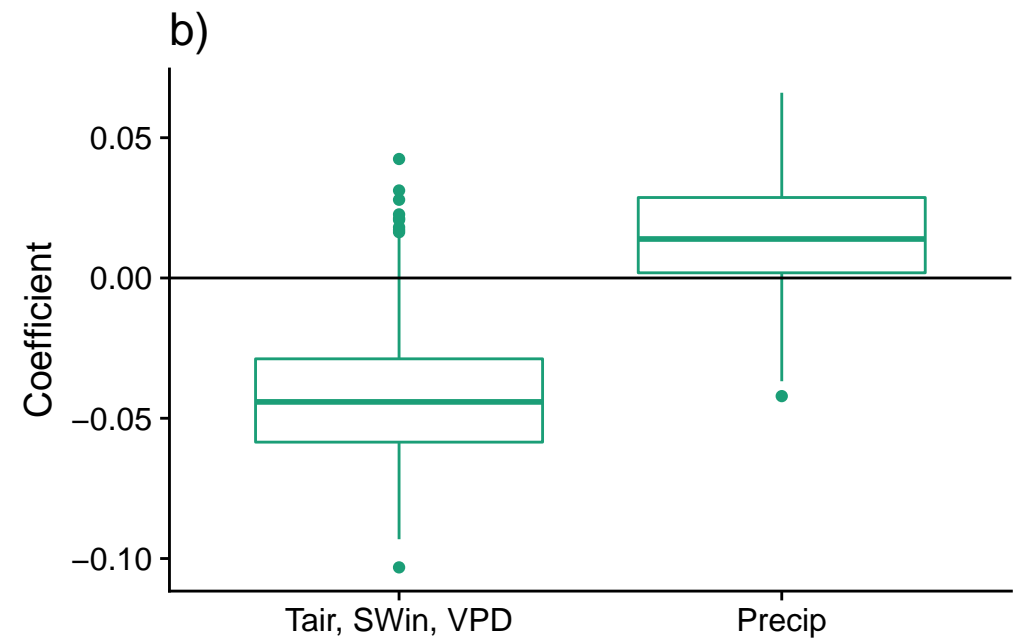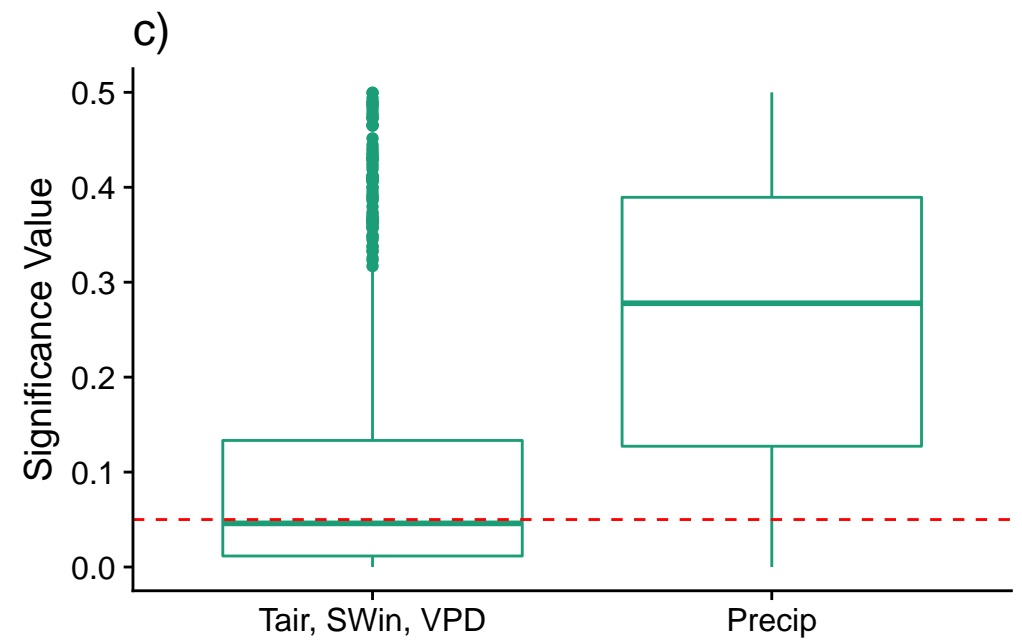



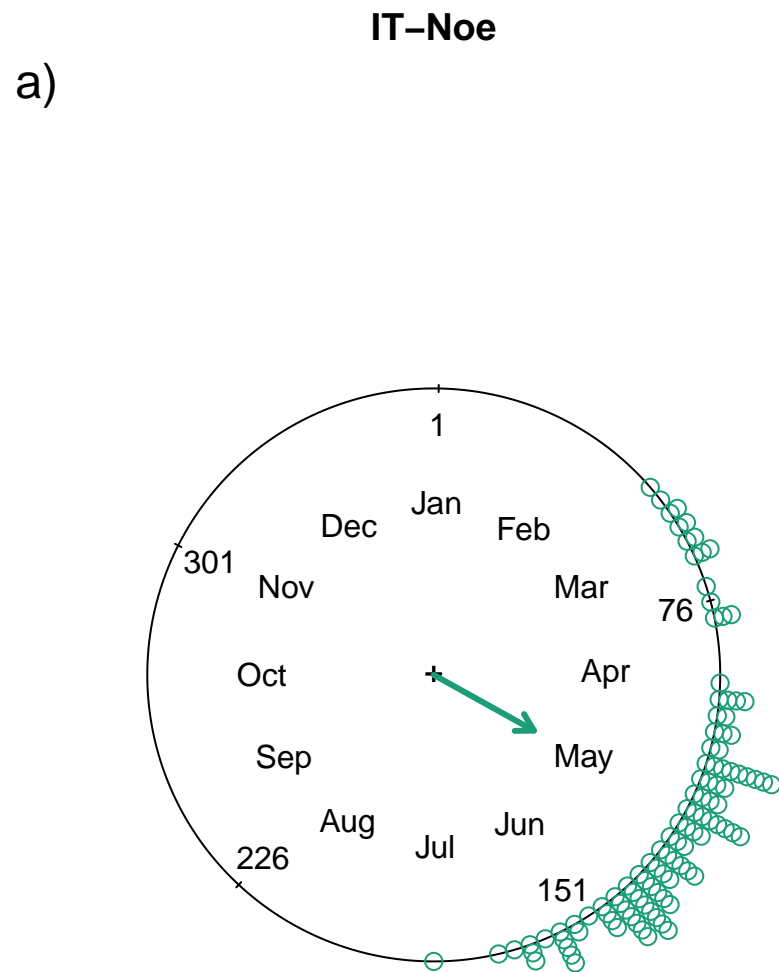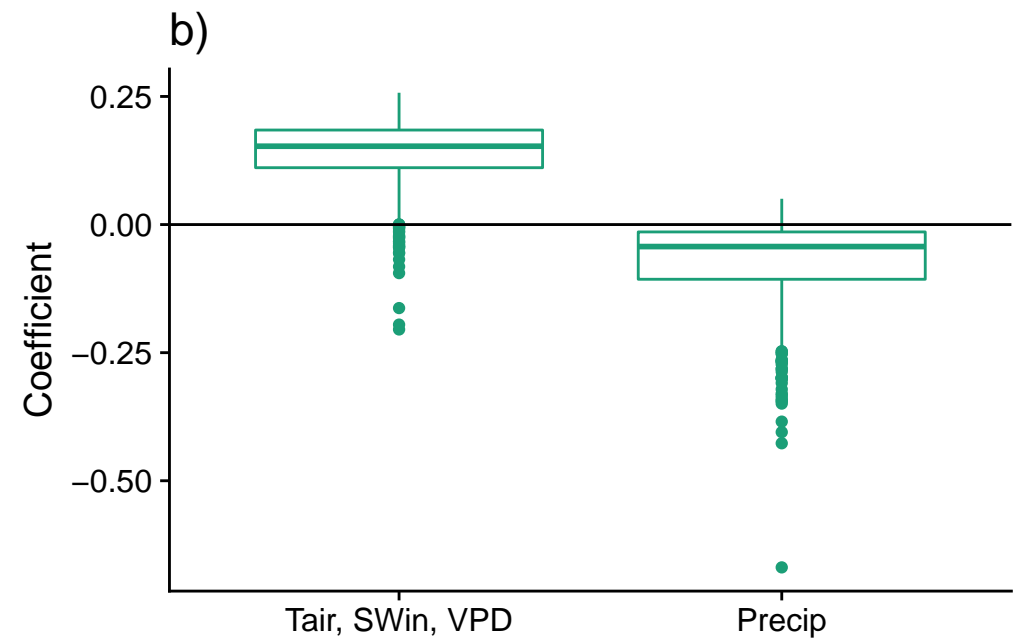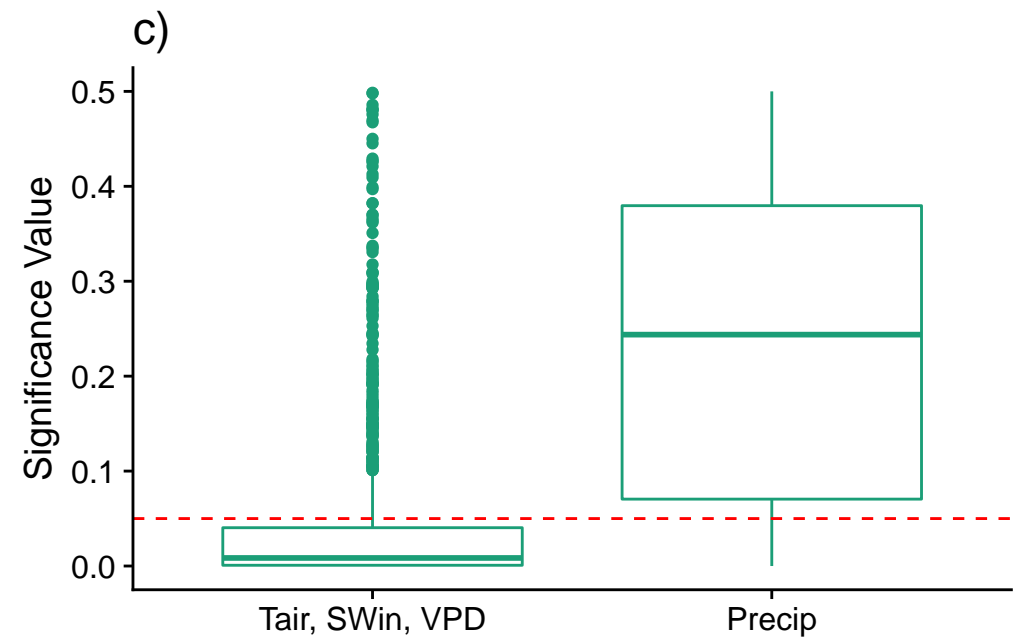

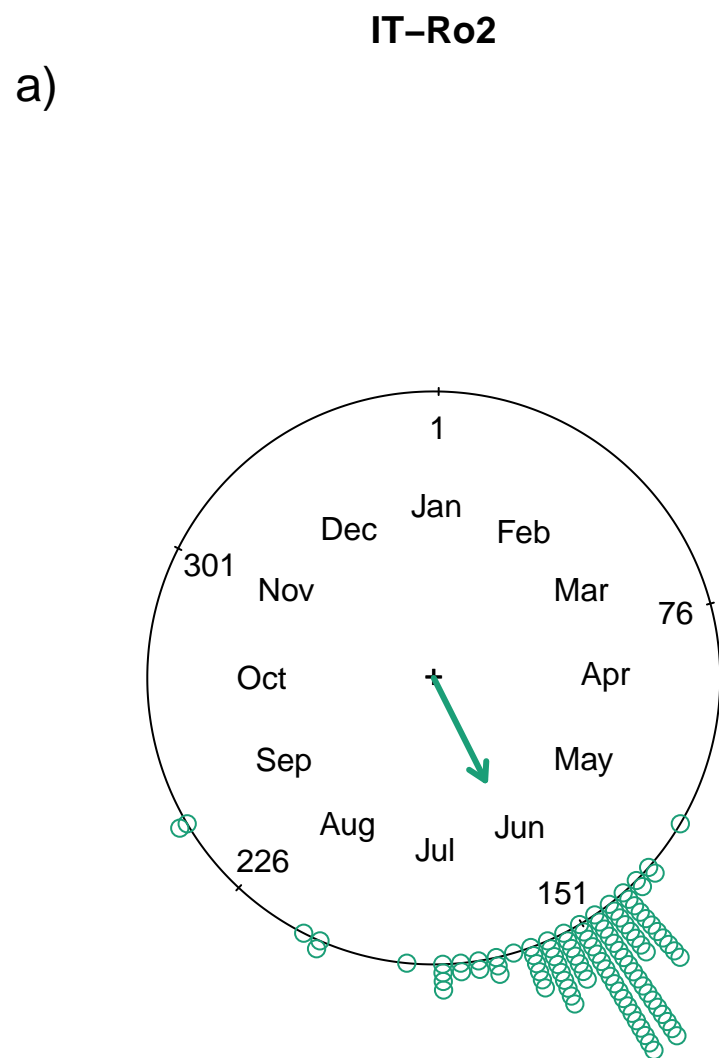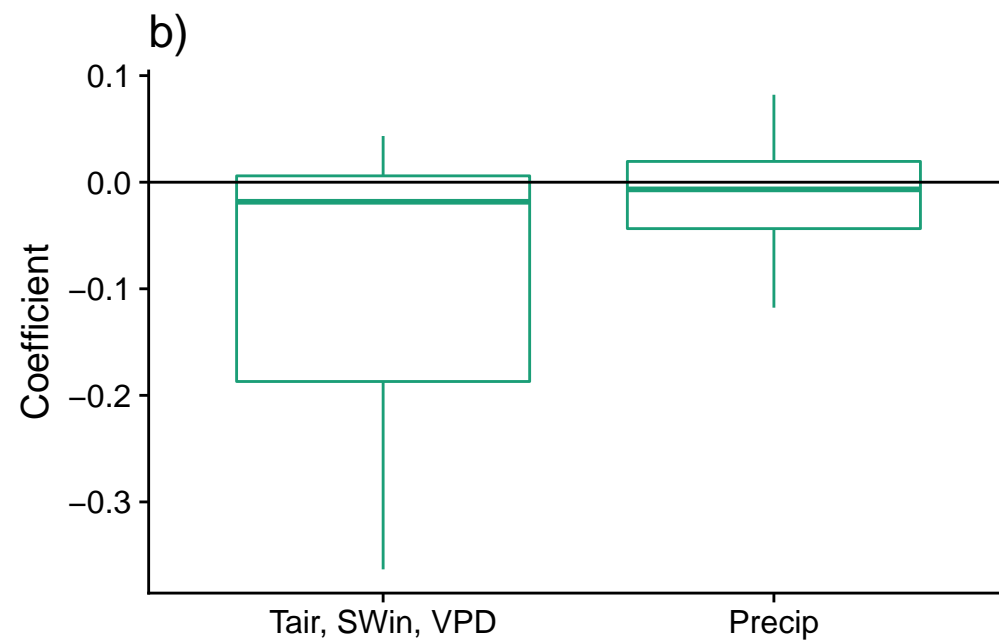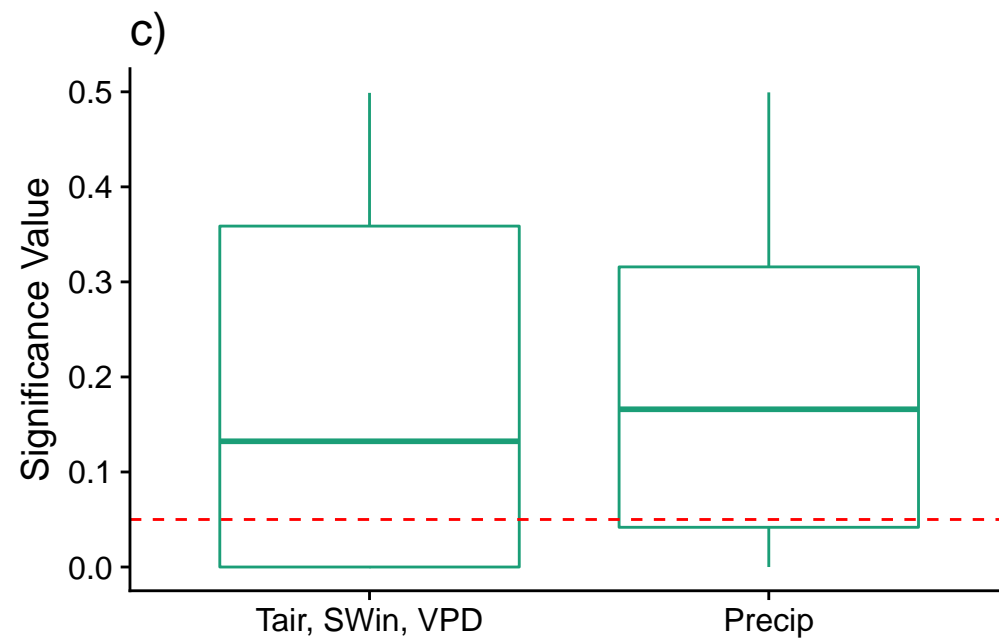

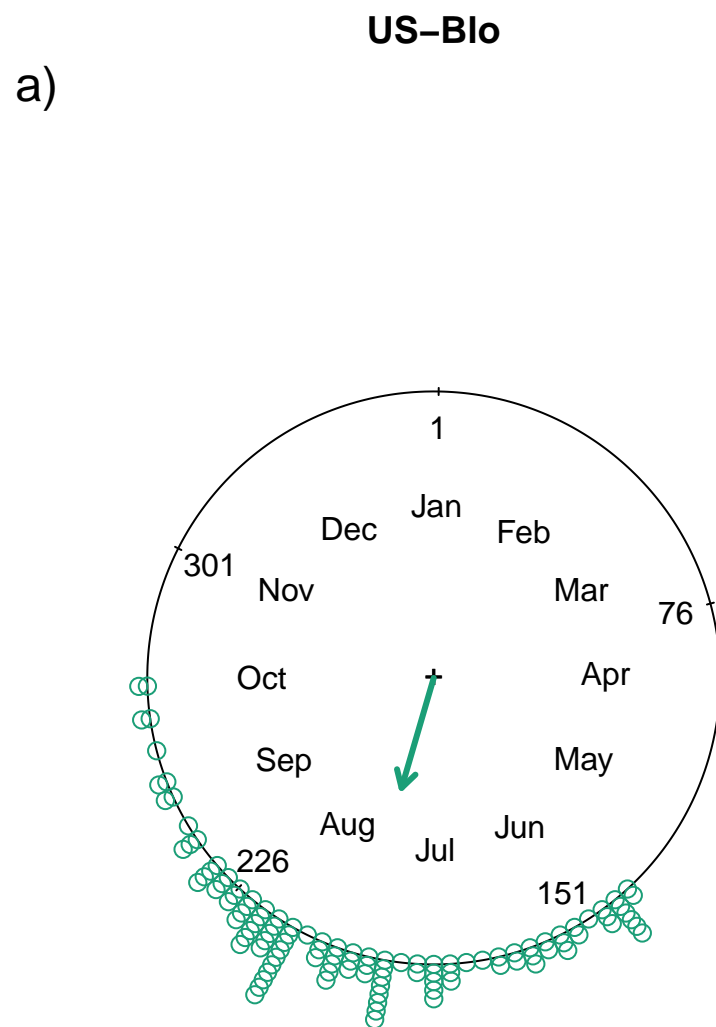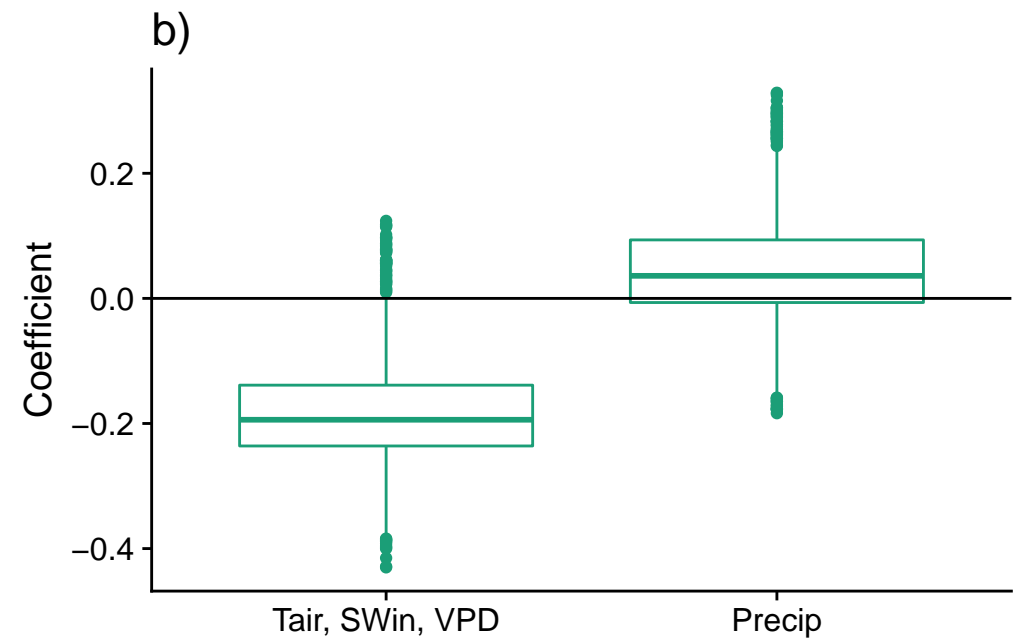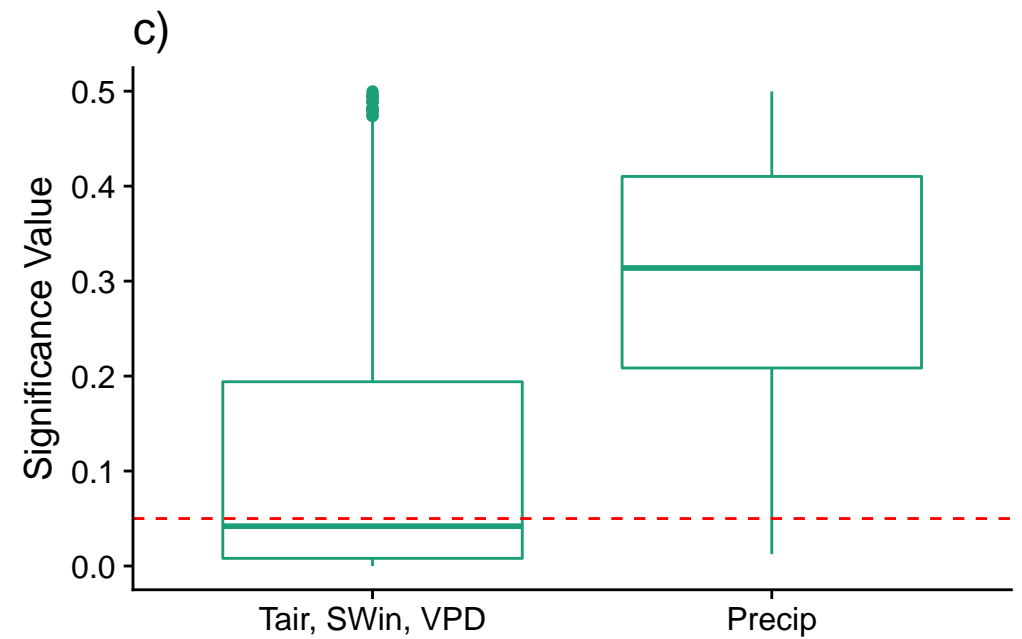

**US-GLE**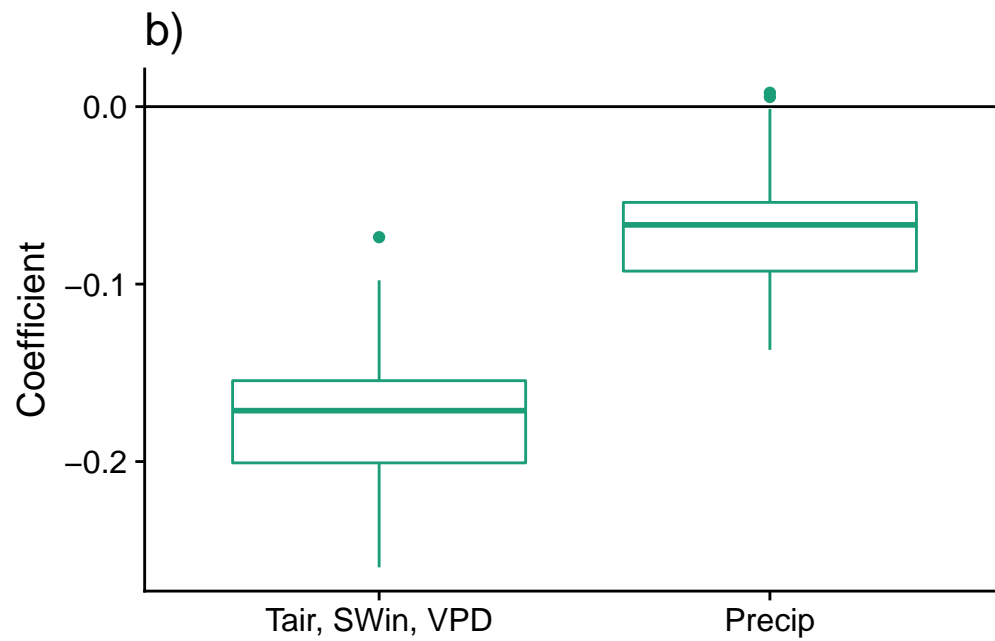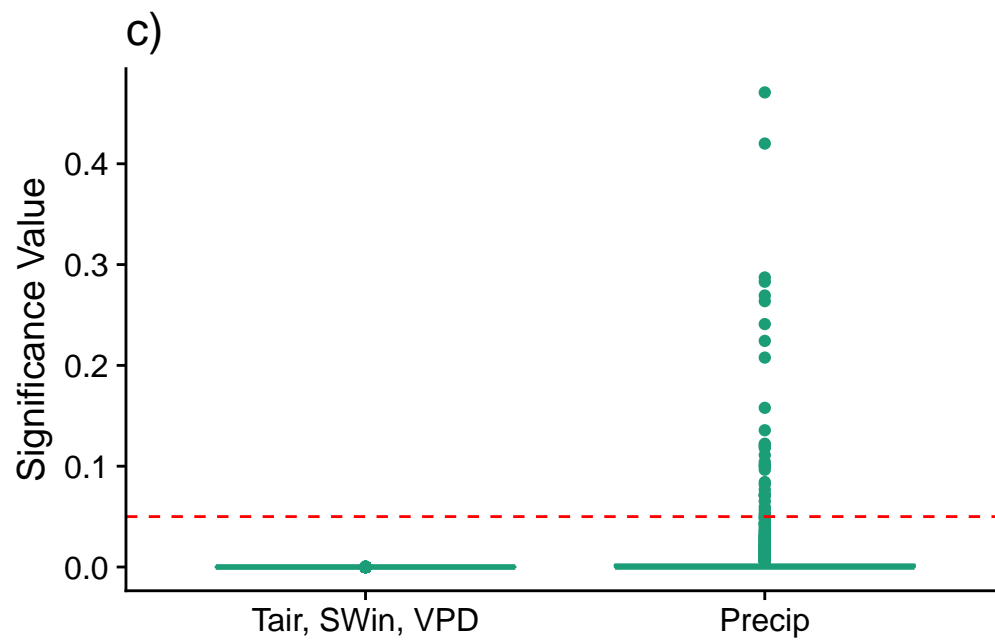

a)

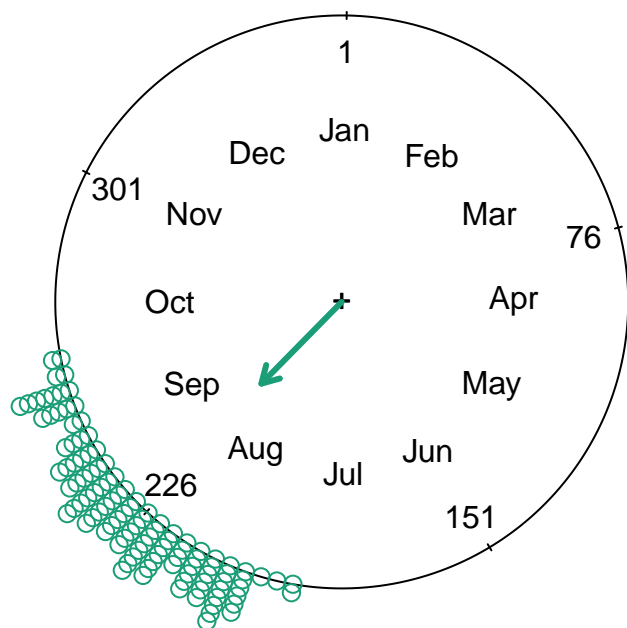

b)

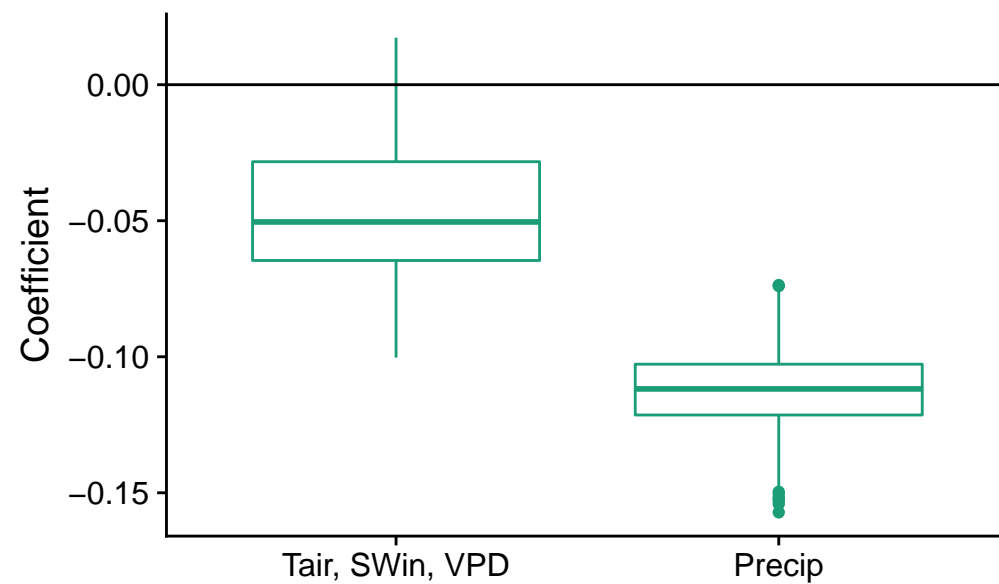

c)

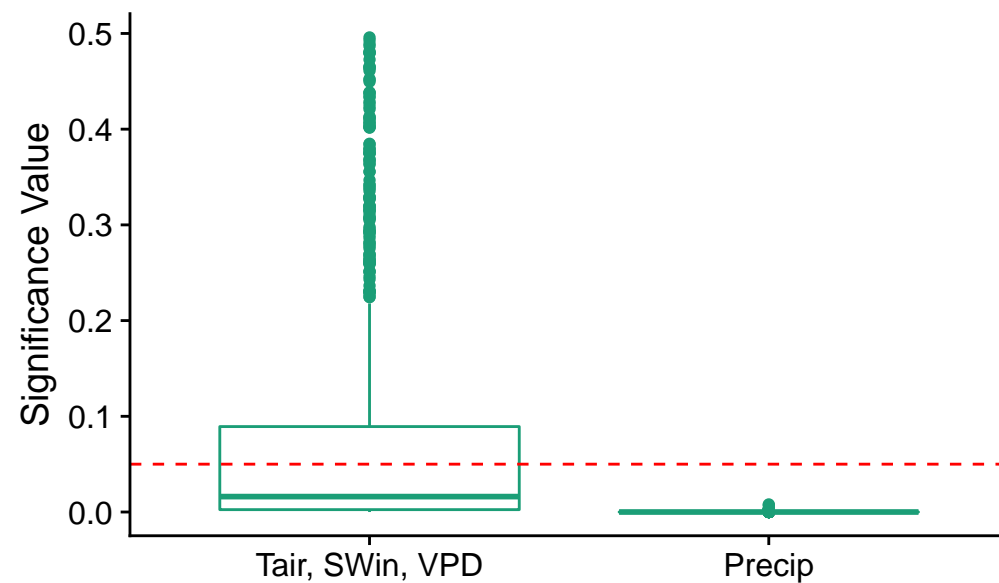

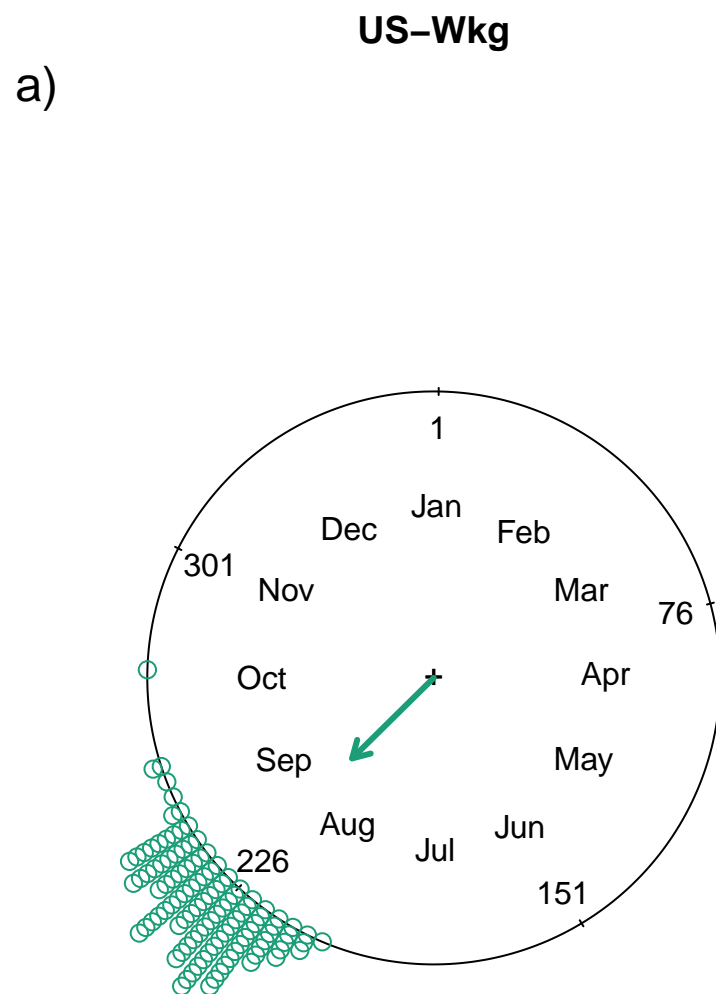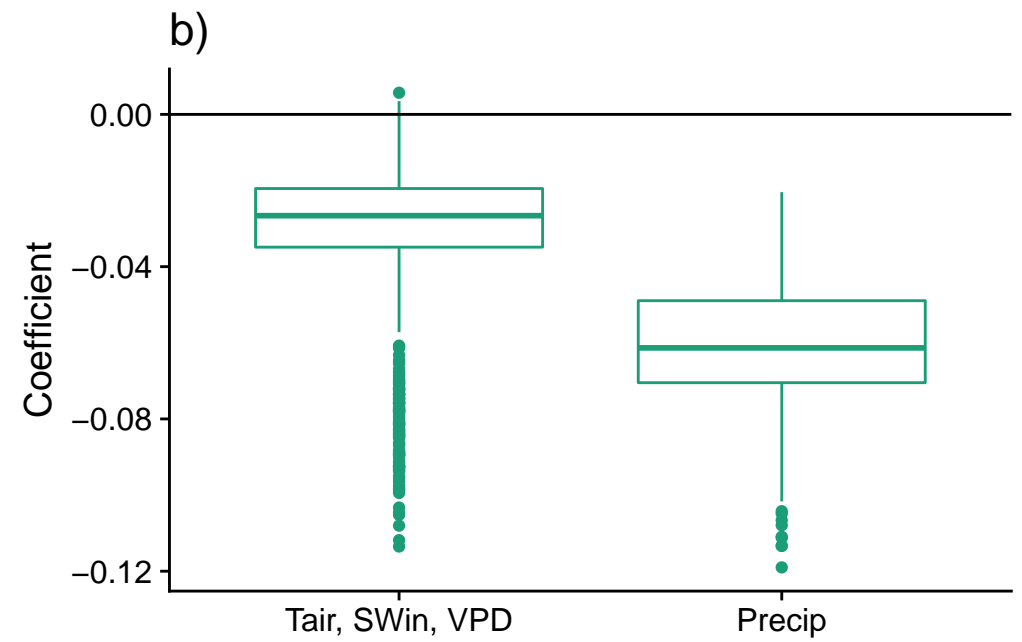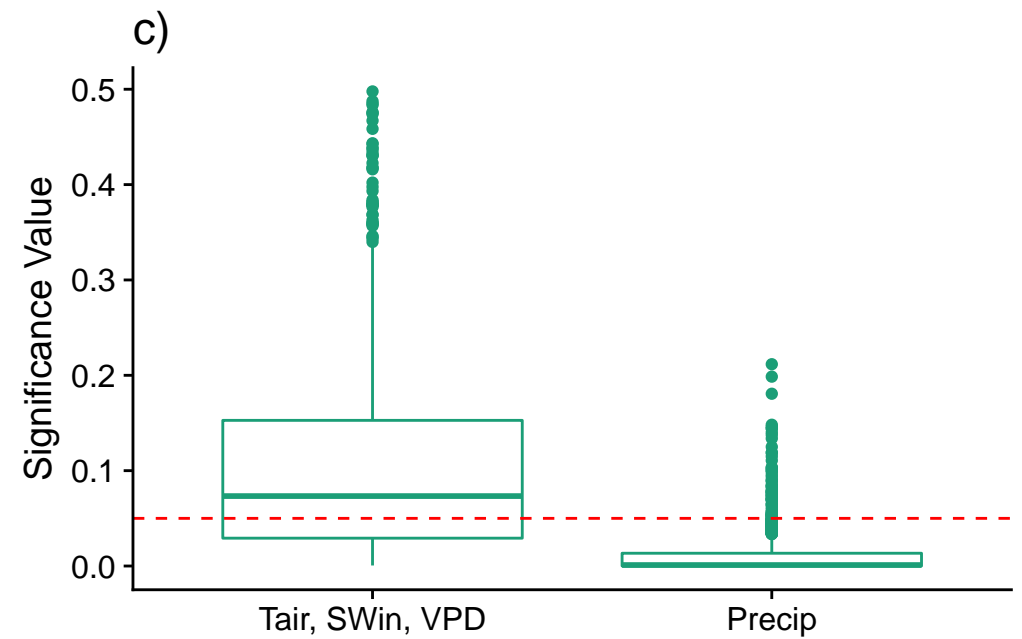

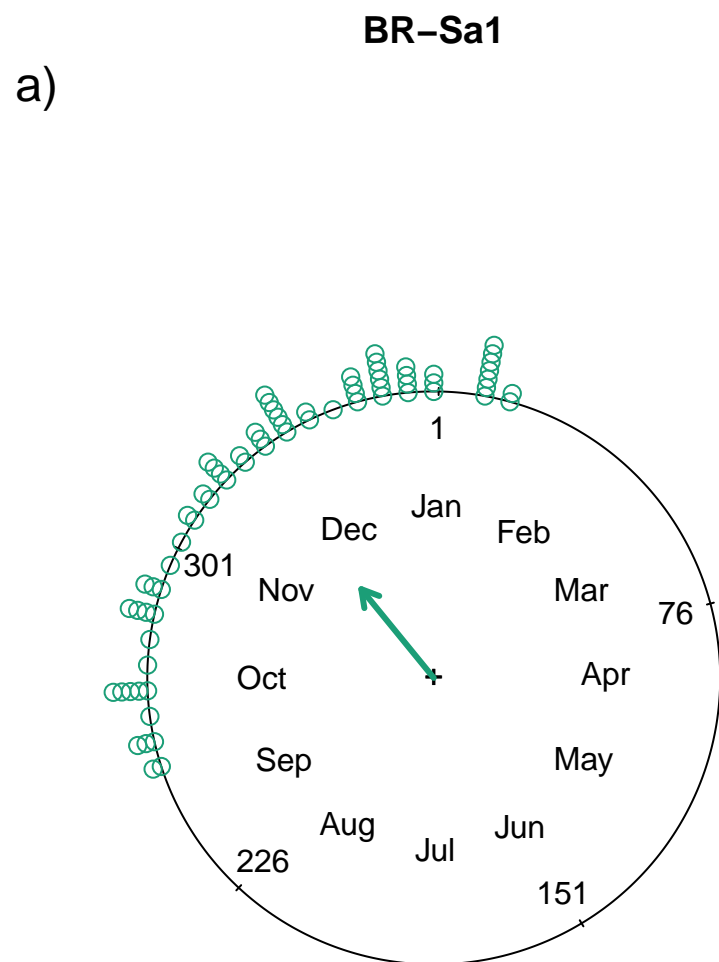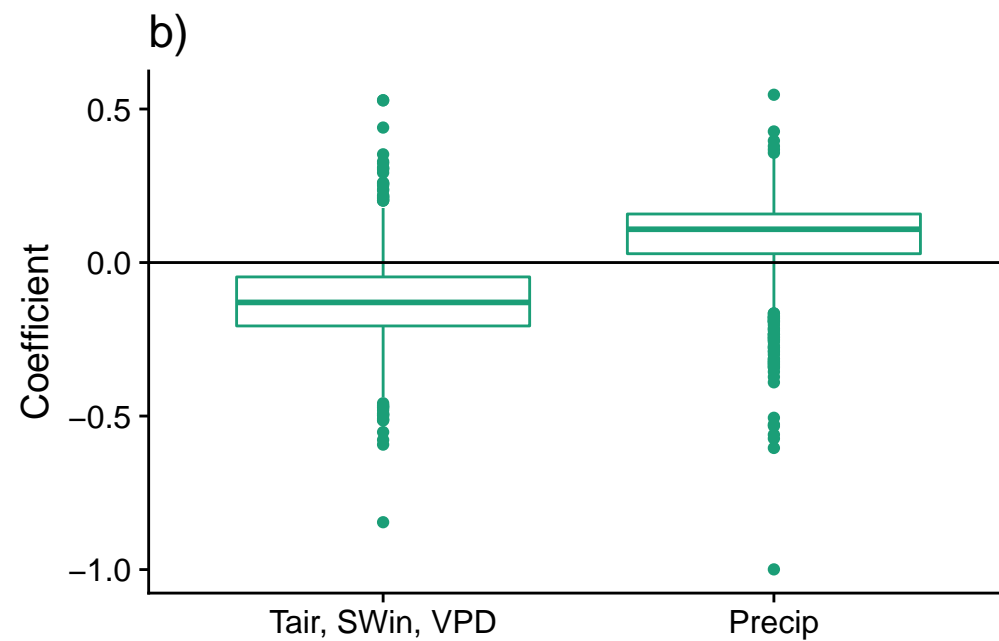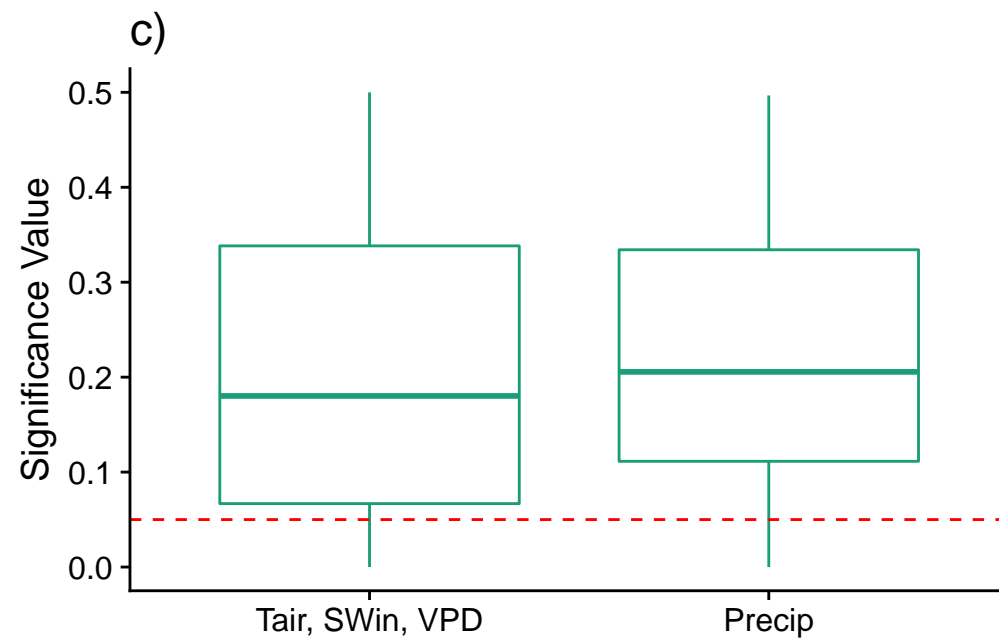

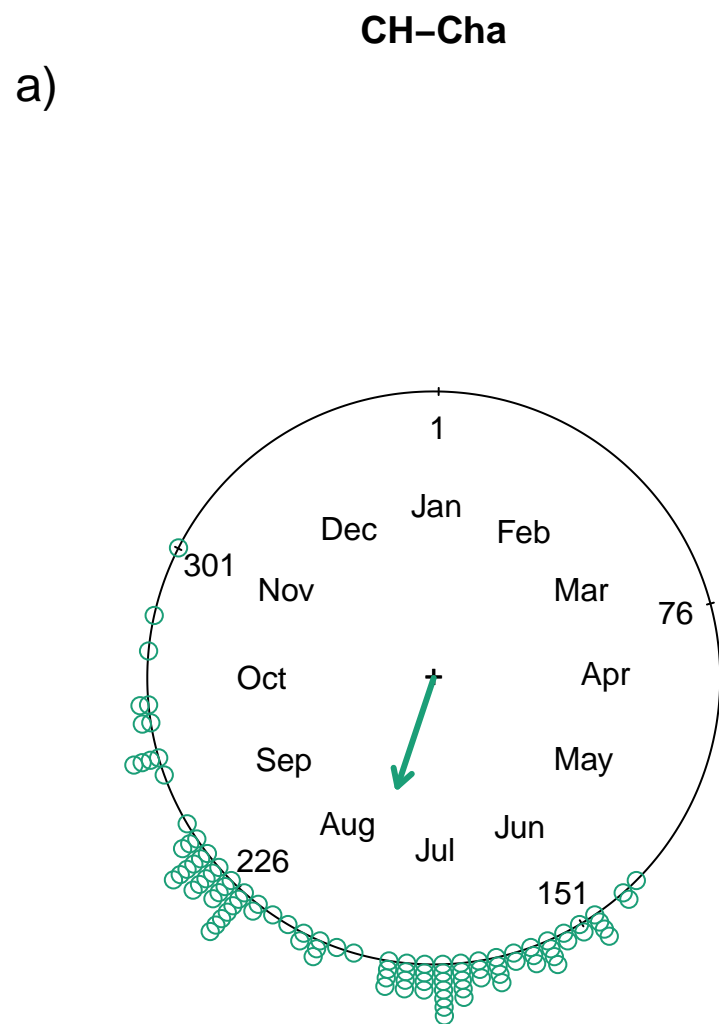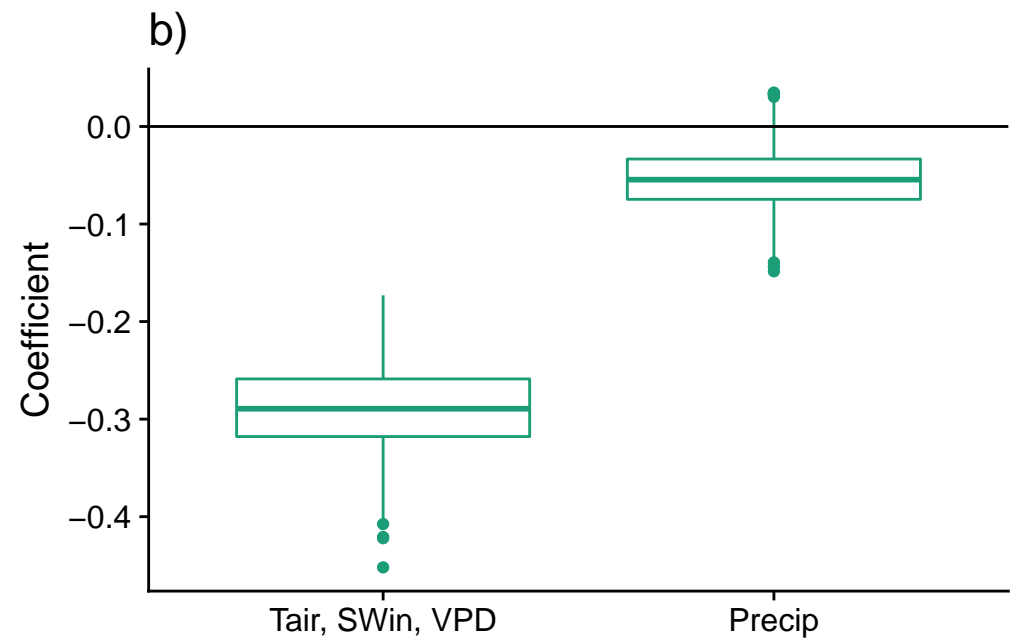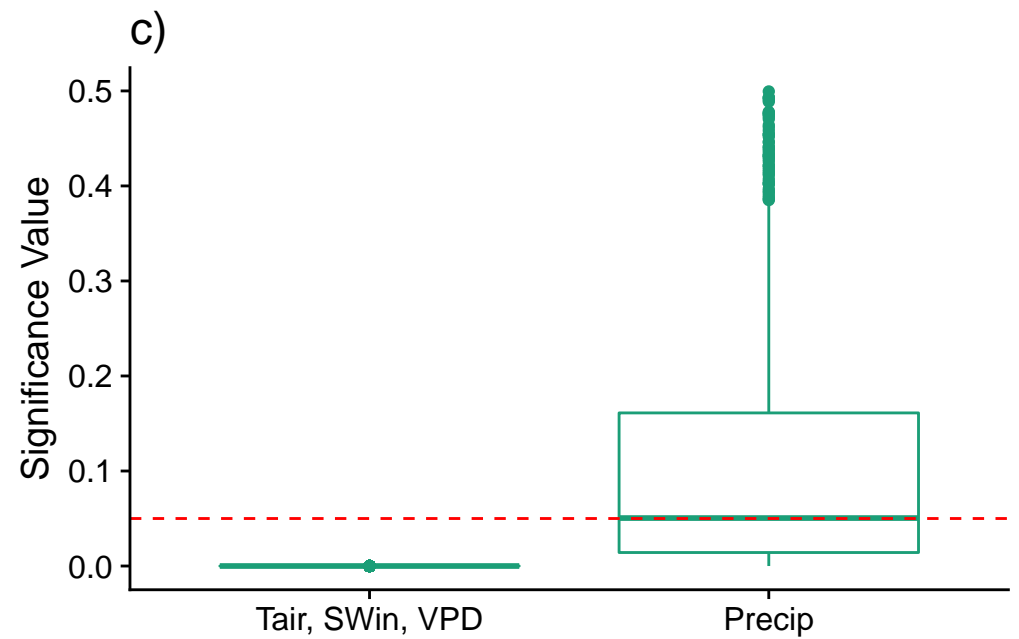



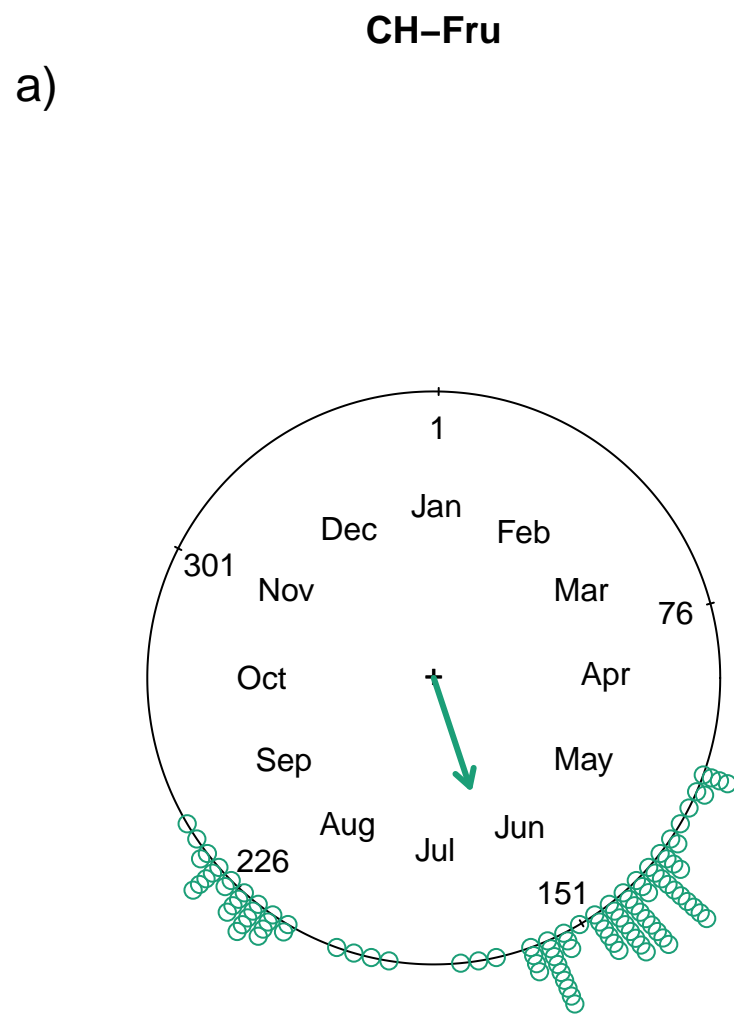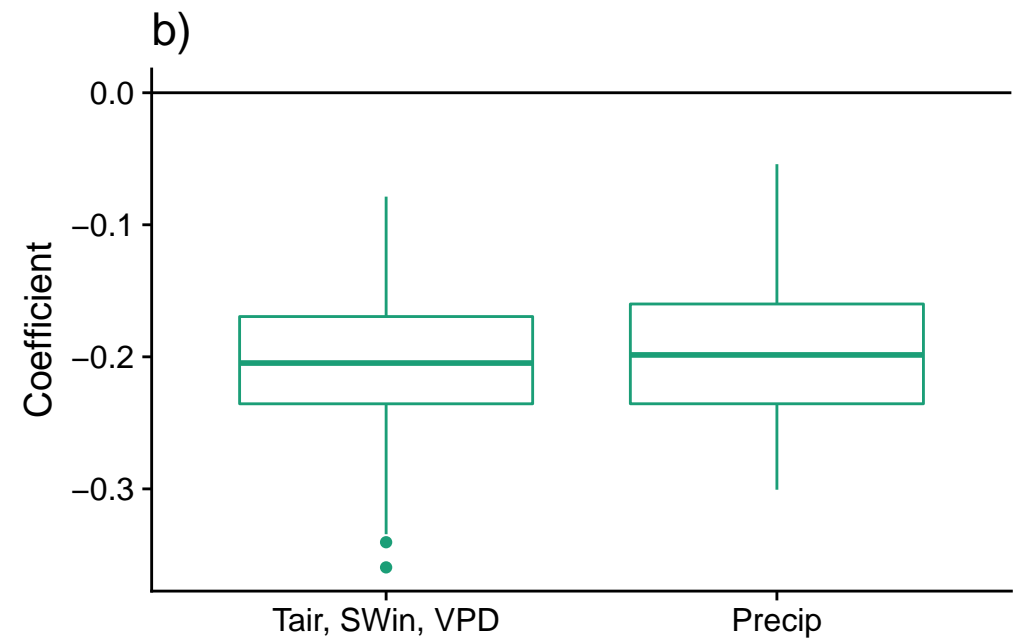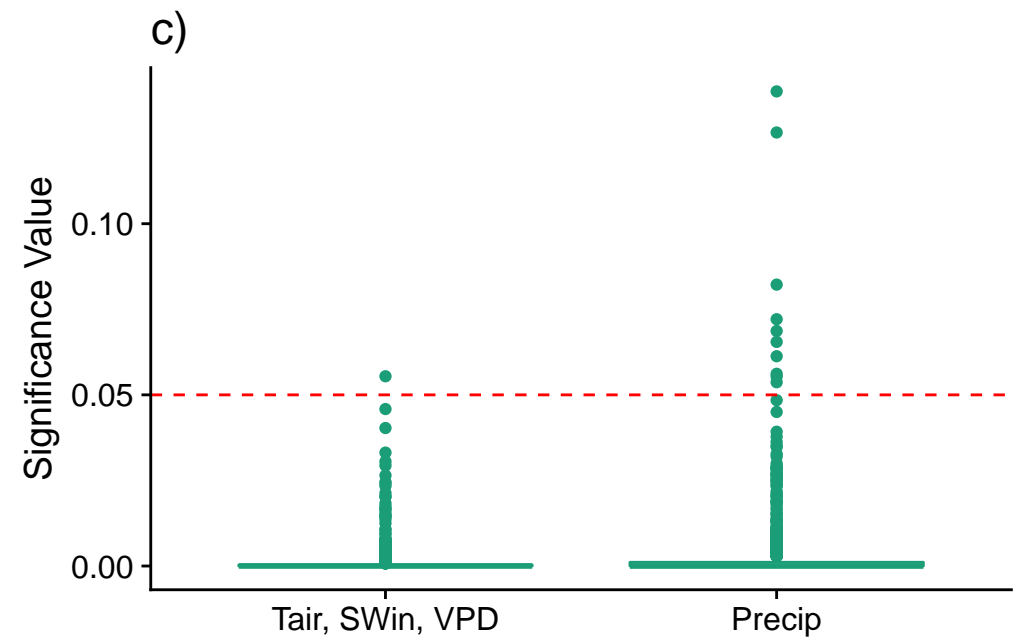

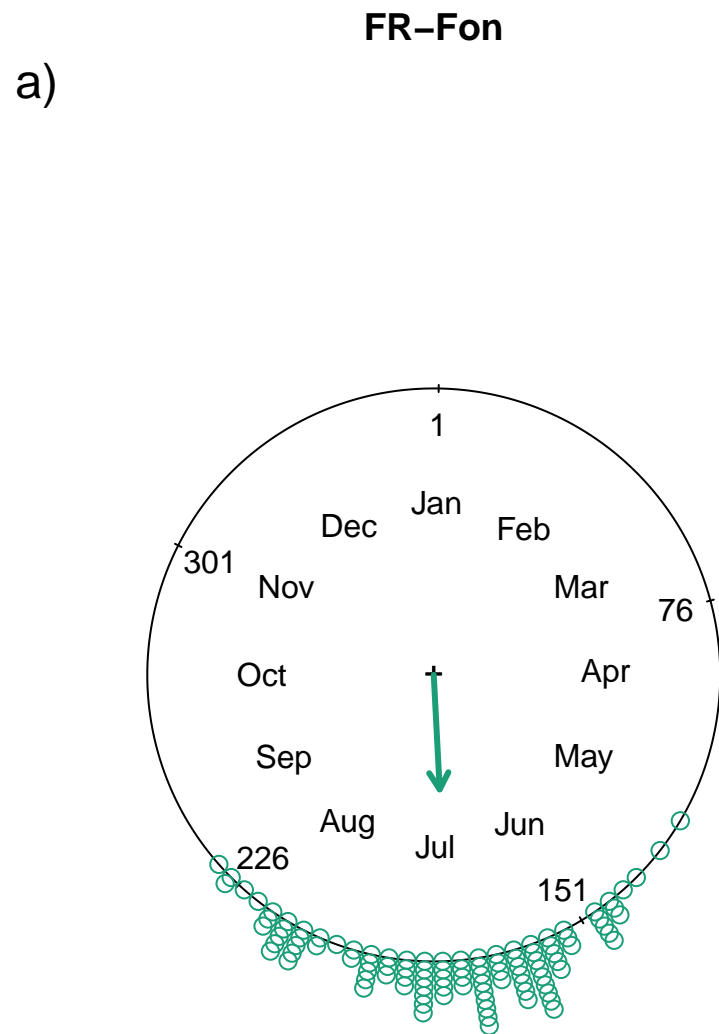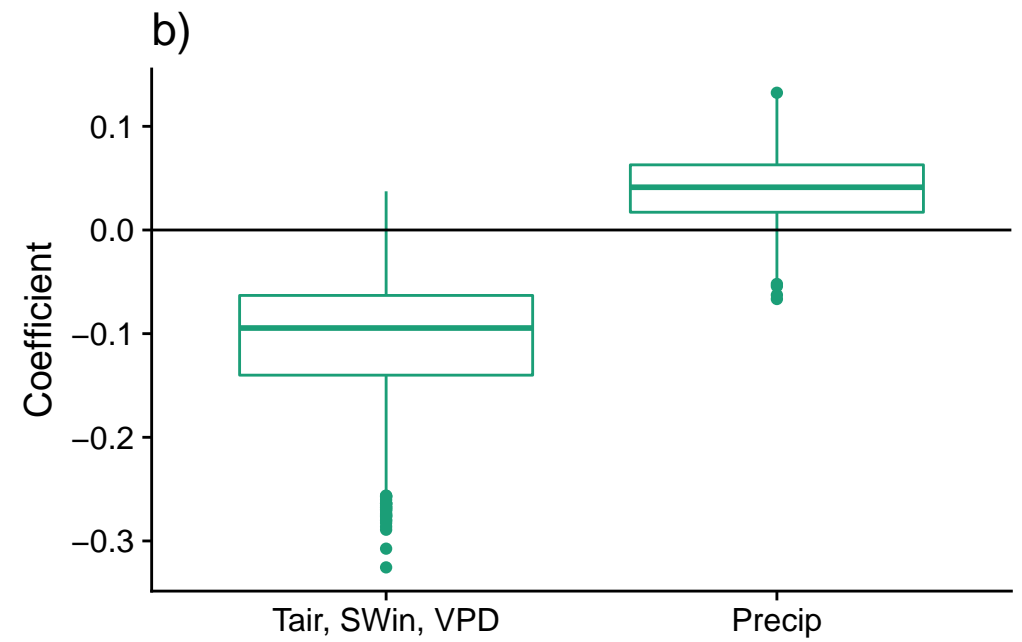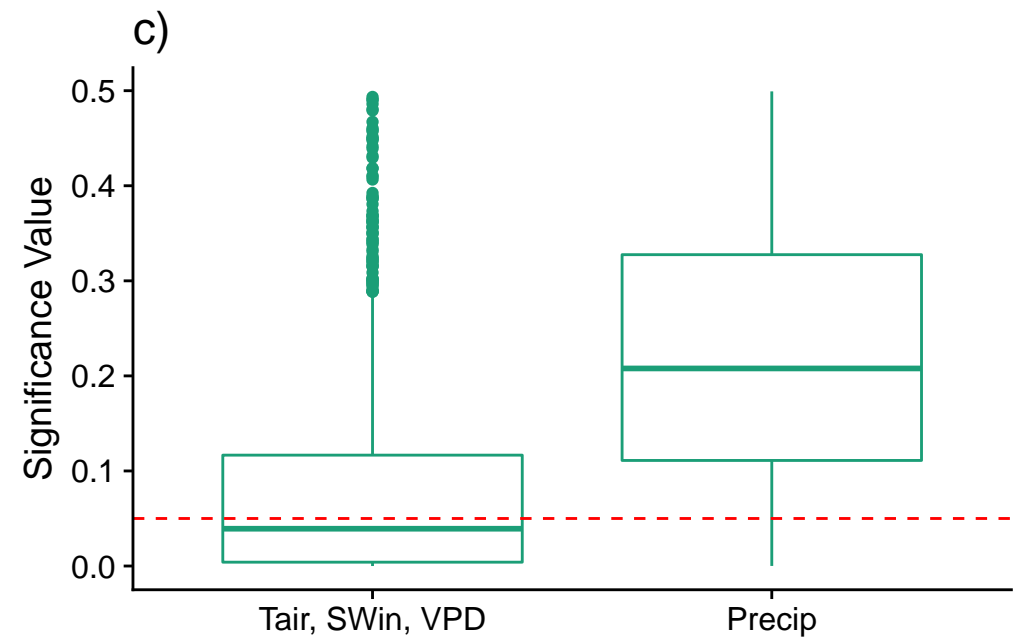

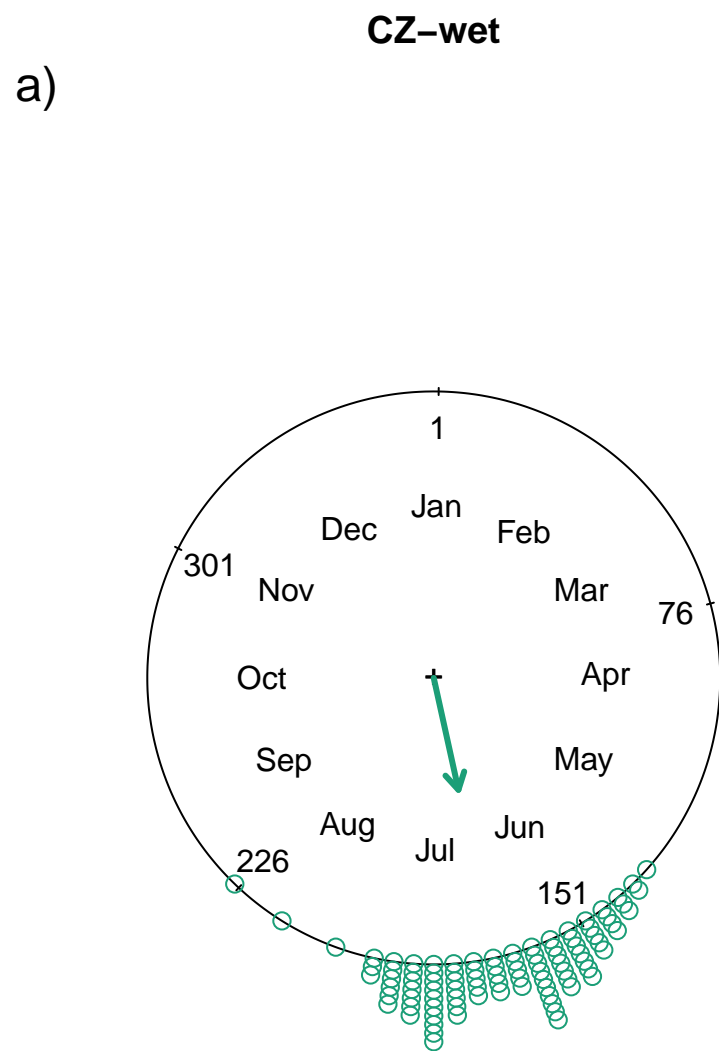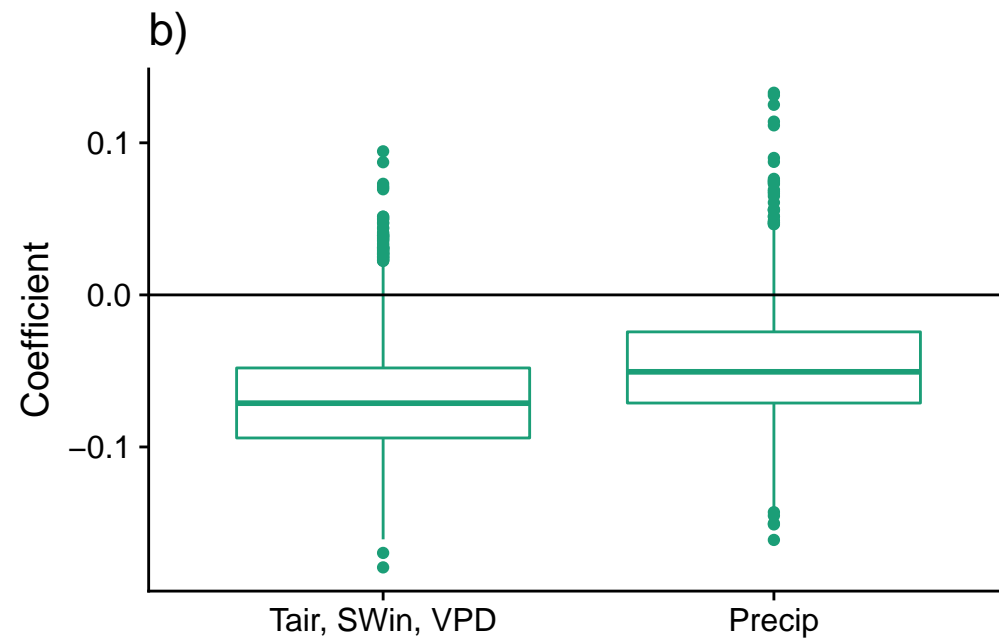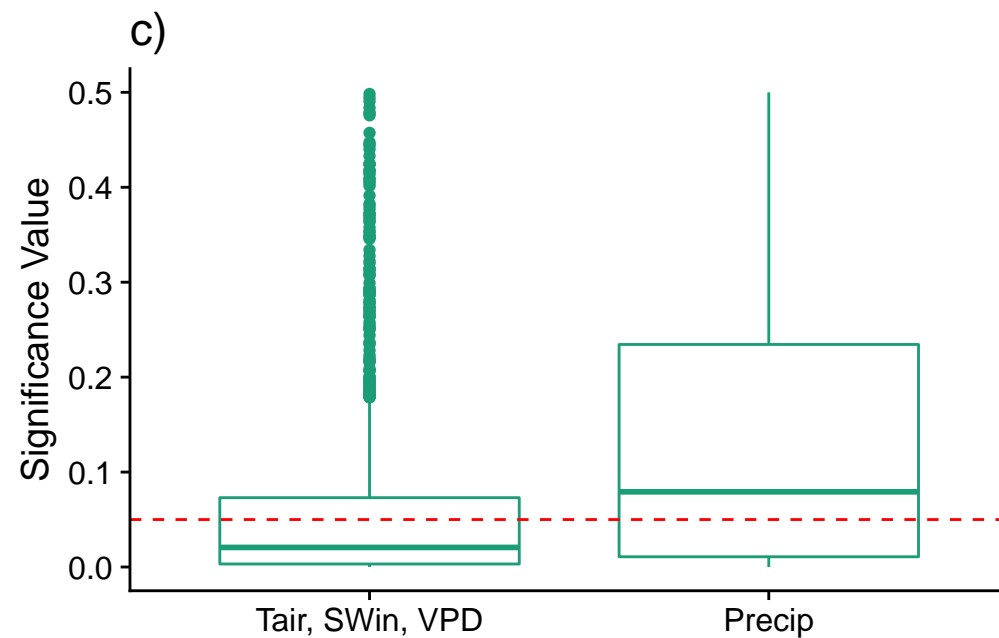

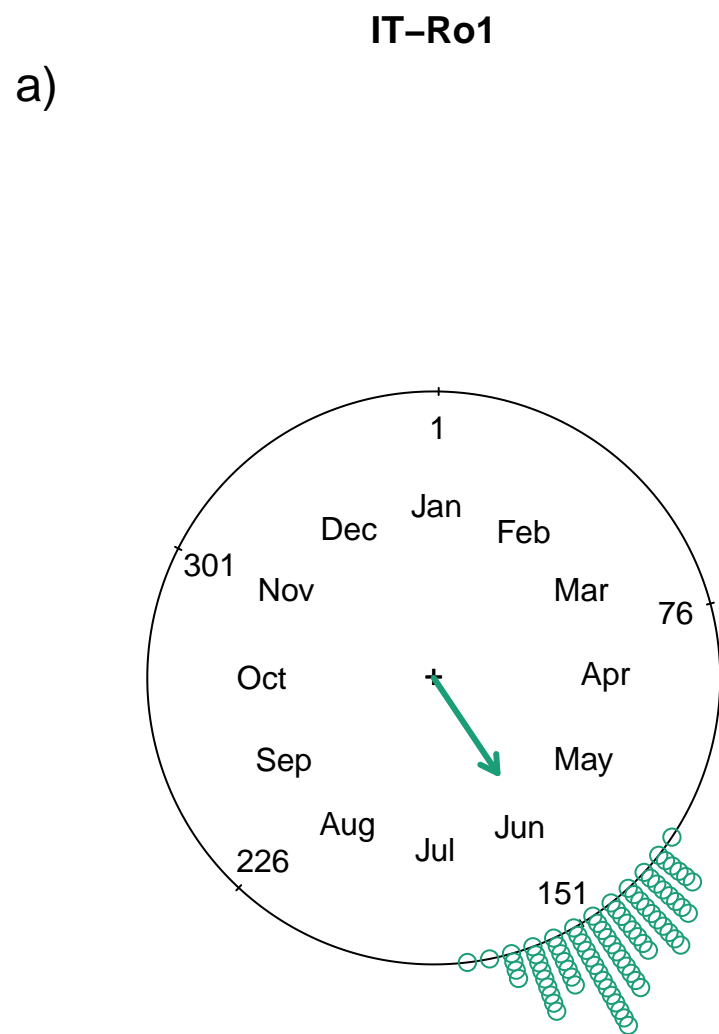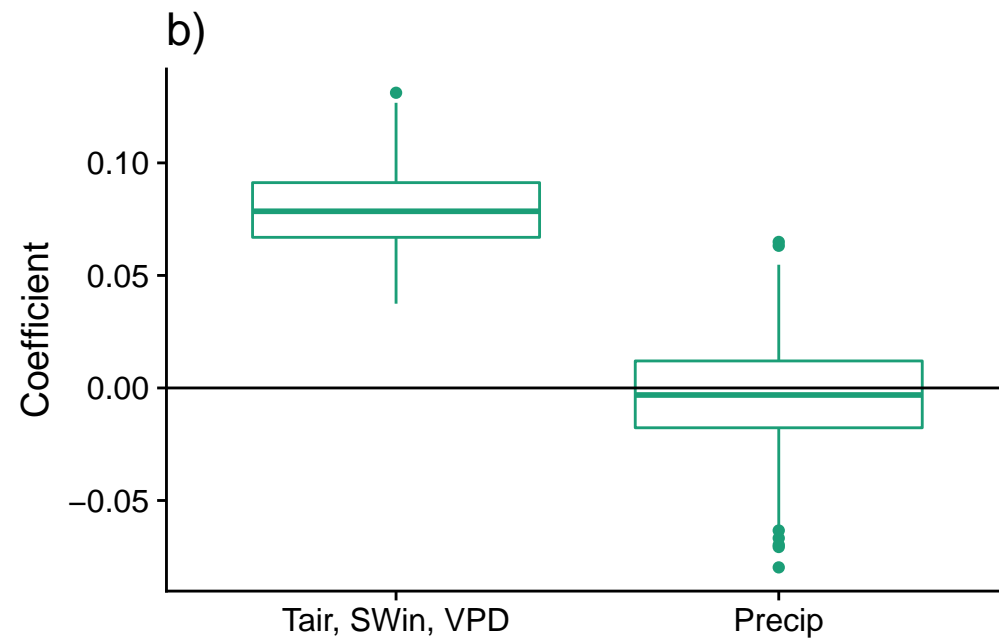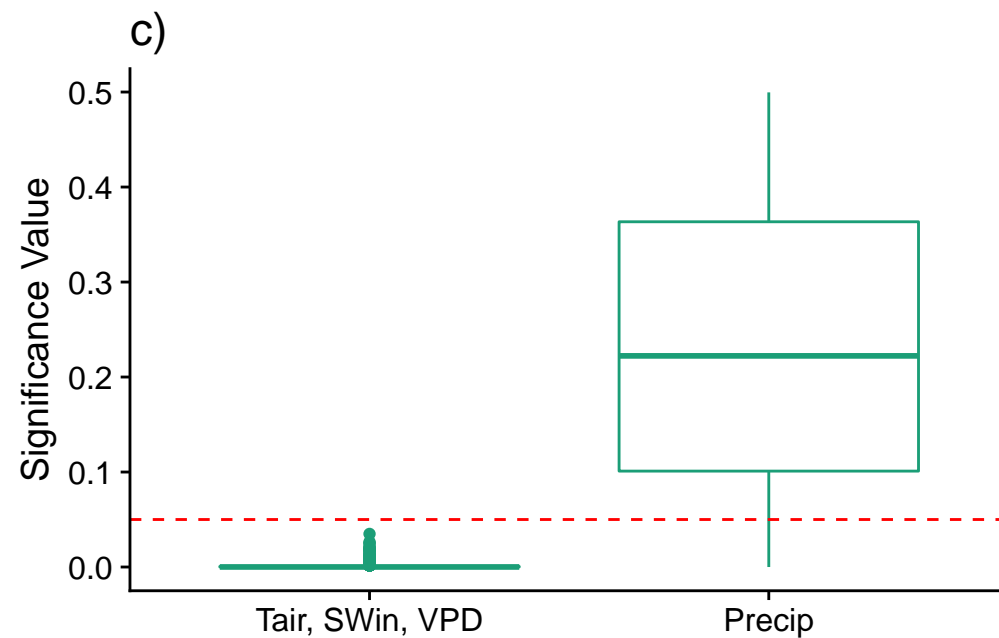

Supplement: Supplementary file 1 [file bg-17-3991-2020-supplement.zip]
