# Supplementary material for: Ecosystem physio-phenology revealed using circular statistics
Source: Copernicus journal article supplement (doi:10.5194/bg-17-3991-2020), 2020-08-06
Supplement: Supplementary file 2 [file bg-17-3991-2020-supplement.zip]

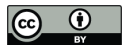

## *Supplement of*

# **Ecosystem physio-phenology revealed using circular statistics**

**Daniel E. Pabon-Moreno et al.**

*Correspondence to:* Daniel E. Pabon-Moreno ([dpabon@bgc-jena.mpg.de](mailto:dpabon@bgc-jena.mpg.de))

- [bg-17-3991-2020-supplement-title-page.pdf](#)
- [Supplement\\_1.pdf](#)
- [Supplement\\_2.pdf](#)
- [Supplement\\_3.pdf](#)

The copyright of individual parts of the supplement might differ from the CC BY 4.0 License.
